# Supplementary material
Source: publisher figshare collection journal article supplement (https://acs.figshare.com/ndownloader/files/3842629)
Supplement: Supplementary file 1 [file 3842629]

## Supporting Information

### **Tuning Ligand Effects and Probing the Inner-Workings of Bond Activation Steps: Generation of Ruthenium Complexes with Tailor-made Properties**

Fritz Weisser,<sup>†</sup> Sebastian Plebst,<sup>‡</sup> Stephan Hohloch,<sup>†</sup> Margarethe van der Meer,<sup>†</sup> Sinja Manck,<sup>†</sup> Felix Führer,<sup>†</sup> Vanessa Radtke,<sup>†</sup> Daniel Lechnitz,<sup>†</sup> and Biprajit Sarkar<sup>\*,†</sup>

<sup>†</sup> Institut für Chemie und Biochemie, Anorganische Chemie, Freie Universität Berlin, Fabeckstraße 34-36, D-14195, Berlin, Germany

<sup>‡</sup> Institut für Anorganische Chemie, Universität Stuttgart, Pfaffenwaldring 55, D-70569, Stuttgart, Germany

## **Content**

|                                |    |
|--------------------------------|----|
| Ligands and Complexes          | 1  |
| Syntheses                      | 3  |
| $^1\text{H}$ NMR Spectra       | 10 |
| Crystal Structures             | 23 |
| Cyclic Voltammetry             | 27 |
| CV Simulations                 | 32 |
| Bulk Electrolysis              | 36 |
| UV/Vis Spectroelectrochemistry | 38 |
| EPR Spectroelectrochemistry    | 46 |
| Thermo- and Photoreactivity    | 47 |
| Mechanism of the Photoreaction | 54 |
| DFT Calculations               | 61 |
| Literature                     | 69 |

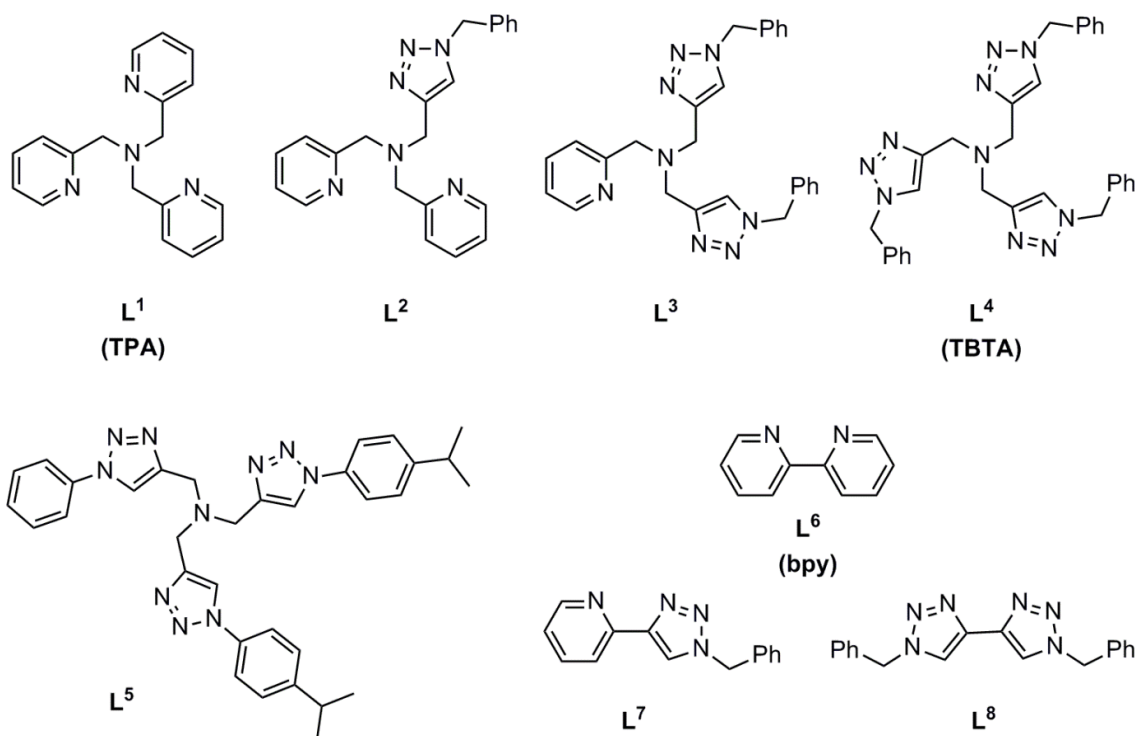

**Scheme S1.** Ligands used in this work.

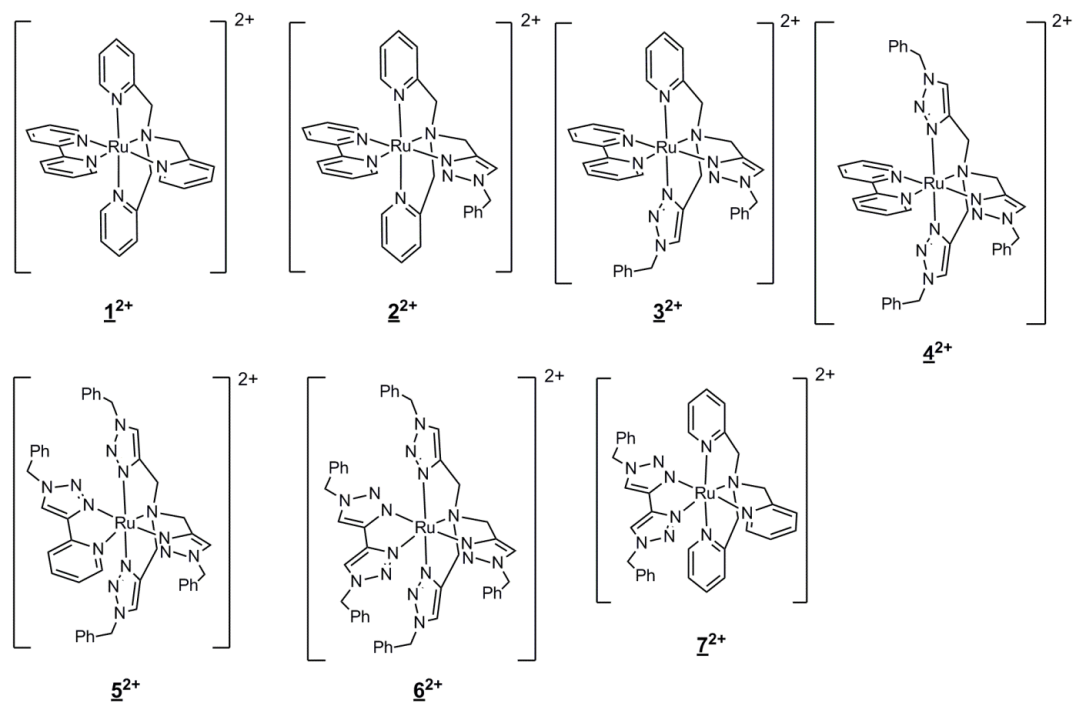

**Scheme S2.** Complexes **1<sup>2+</sup>**–**7<sup>2+</sup>** (each complexes has two PF<sub>6</sub><sup>−</sup> counterions).

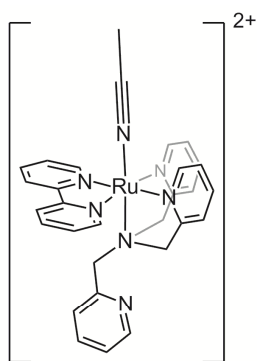

**[1(CH<sub>3</sub>CN)]<sup>2+</sup>**

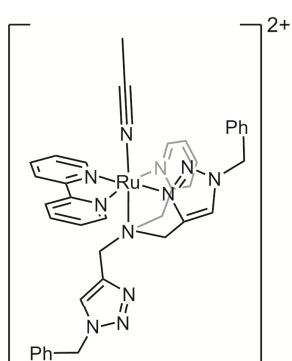

**[3(CH<sub>3</sub>CN)]<sup>2+</sup>**

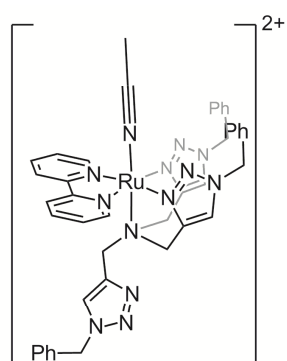

**[4(CH<sub>3</sub>CN)]<sup>2+</sup>**

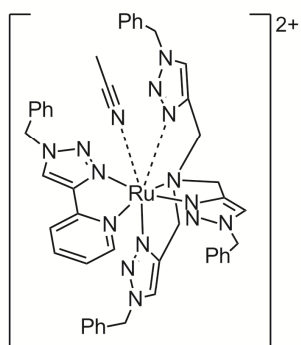

or

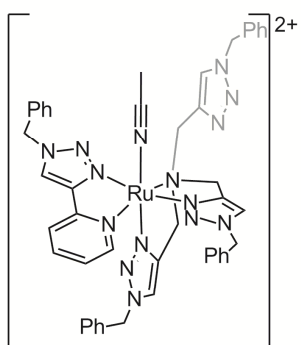

**[5(CH<sub>3</sub>CN)]<sup>2+</sup>**

or

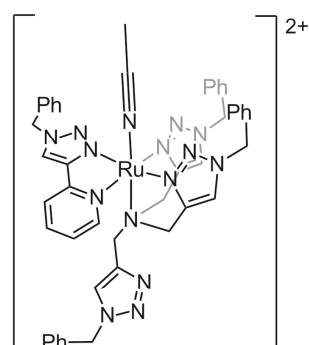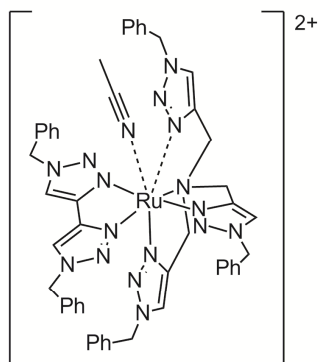

or

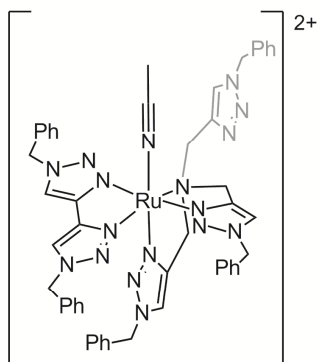

**[6a(CH<sub>3</sub>CN)]<sup>2+</sup>**

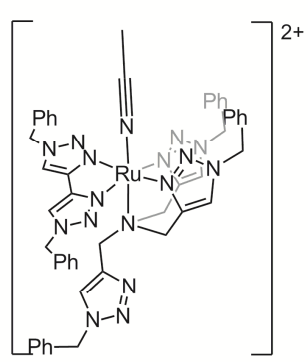

**[6b(CH<sub>3</sub>CN)]<sup>2+</sup>**

**Scheme S3.** Acetonitrile adducts of complexes **1**<sup>2+</sup> and **3**<sup>2+</sup>–**6**<sup>2+</sup>.



## Syntheses

Schemes S1–S3 show the ligands used in this work, the synthesized complexes, and the corresponding acetonitrile adducts. Schemes S4 and S5 show the synthesis of **L**<sup>5</sup> and the general synthesis of the complexes **1**<sup>2+</sup>–**8**<sup>2+</sup>, respectively.

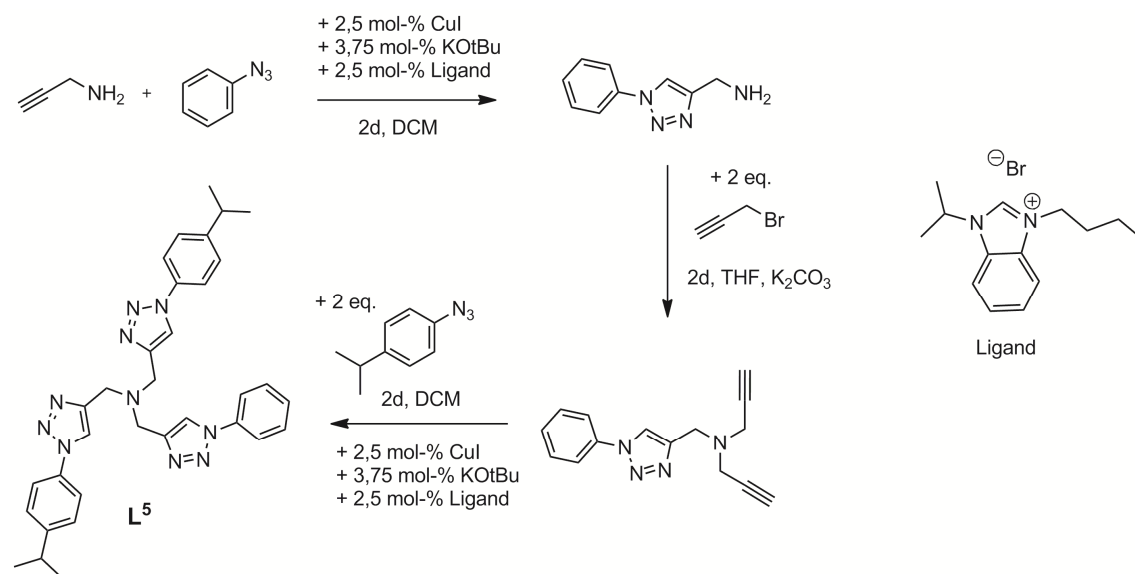

**Scheme S4.** Synthesis of ligand **L**<sup>5</sup>.

***N,N*-bis[4-isopropylphen-1-yl-1*H*-1,2,3-triazol-4-yl)methyl]-*N*-[(phen-1-yl-1*H*-1,2,3-triazol-4-yl)methyl]amine (**L**<sup>5</sup>):** Propargyl amine (280 mg, 5 mmol) and phenylazide<sup>1</sup> (740 mg, 6 mmol) were mixed in a Schlenk flask in DCM (20 mL). 1-Butyl-3-isopropyl-1*H*-benzo[d]imidazol-3-iumbromid<sup>2</sup> (37 mg, 2.5 mol-%), CuI (24 mg, 2.5 mol-%), and KO<sup>t</sup>Bu (24 mg, 3.75 mol-%) were added, and the mixture was stirred for 2 d at room temperature. A H<sub>2</sub>EDTANa<sub>2</sub> (ca. 0.5 g) solution in aqueous ammonia (ca. 5%, 15 mL) was added to stop the reaction. The aqueous phase was extracted with DCM (3× 15 mL), and the combined organic phases were washed with distilled water and dried over Na<sub>2</sub>SO<sub>4</sub>. The solvent was removed under reduced pressure, and the resulting residue was purified by column chromatography on basic aluminum oxide by slowly changing the eluent from DCM (phenylazide) to ethyl acetate and finally methanol (product). The product (1-phenyl-1*H*-1,2,3-triazol-4-yl)methanamine was obtained as a light yellow solid (748 mg, 86% yield). <sup>1</sup>H NMR (400 MHz, acetone-*d*<sub>6</sub>): δ = 8.38 (s, 1H, *Ph*-triazole), 7.90–7.85 (m, 2H, *Ph*-triazole), 7.58–7.52 (m, 2H, *Ph*-triazole), 7.46–7.41 (m, 1H, *Ph*-triazole), 4.53 (s, 2H, triazole-CH<sub>2</sub>-N<sub>amine</sub>).

(1-Phenyl-1*H*-1,2,3-triazol-4-yl)methanamine (510 mg, 2.9 mmol), propargylbromide (9.0 mmol, 80 wt-% in toluene, 1.0 mL), and K<sub>2</sub>CO<sub>3</sub> (25 mmol, 3.46 g) were mixed in dry THF (20 mL) in a Schlenk flask and stirred at room temperature for 1 d. After addition of another portion of propargylbromide (0.3 mL), the mixture was stirred for another day. The mixture was then filtered under an inert gas atmosphere, washed with dry DCM, and the filtrate was concentrated by removing the volatiles in a vacuum to obtain crude *N*-[(1-phenyl-1*H*-1,2,3-triazol-4-yl)methyl]-*N,N*-bis(prop-2-yn-1-yl)amine. The resulting brown oil was used for the subsequent Click reaction without further purification. <sup>1</sup>H NMR (400 MHz, chloroform-*d*): δ = 7.98 (s, 1H, *Ph*-triazole), 7.75–7.71 (m, 2H, *Ph*-triazole), 7.55–7.49 (m, 2H, *Ph*-triazole), 7.45–7.40 (m, 1H, *Ph*-triazole), 3.95 (s, 2H, triazole-CH<sub>2</sub>-N<sub>amine</sub>), 3.52 (d, *J* = 2.4 Hz, 4H, alkyne-CH<sub>2</sub>-N<sub>amine</sub>), 2.28 (t, *J* = 2.4 Hz, 2H, *H*-alkyne-CH<sub>2</sub>) ppm.

The crude *N*-[(1-phenyl-1*H*-1,2,3-triazol-4-yl)methyl]-*N,N*-bis(prop-2-yn-1-yl)amine was dissolved in DCM (15 mL), and 4-isopropylphenylazide (987 mg, 6.1 mmol), 1-butyl-3-isopropyl-1*H*-benzo[d]imidazol-3-iumbromid (37 mg, 2.5 mol-%), CuI (24 mg, 2.5 mol-%), and KO<sup>t</sup>Bu (24 mg, 3.75 mol-%) were added. The mixture was stirred for 2 d at room temperature. The subsequent work-up was identical to that applied in the first Click step. The crude product was purified by column chromatography on basic aluminium oxide by starting with pure DCM as the eluent to wash out the

remaining azide. The desired product  $L^5$  was obtained with a DCM/ethyl acetate mixture (1:1) as the eluent [1.21 g, 73% yield with respect to (1-phenyl-1*H*-1,2,3-triazol-4-yl)methanamine].  $^1\text{H}$  NMR (400 MHz, chloroform- $d$ ):  $\delta$  = 8.26 (s, 1H, Ph-*triazole*), 8.21 (s, 2H, *iPr*-Ph-*triazole*), 7.79–7.74 (m, 2H, Ph-*triazole*), 7.69–7.64 (m, 4H, *iPr*-Ph-*triazole*), 7.54–7.50 (m, 2H, Ph-*triazole*), 7.45–7.39 (m, 1H, Ph-*triazole*), 7.38–7.33 (m, 4H, *iPr*-Ph-*triazole*), 3.95 (s, 6H, triazole- $\text{CH}_2\text{-N}_{\text{amine}}$ ), 2.97 (hept,  $J$  = 6.9 Hz, 2H, *iPr*-Ph), 1.28 (d,  $J$  = 6.9 Hz, 12H, *iPr*-Ph) ppm.

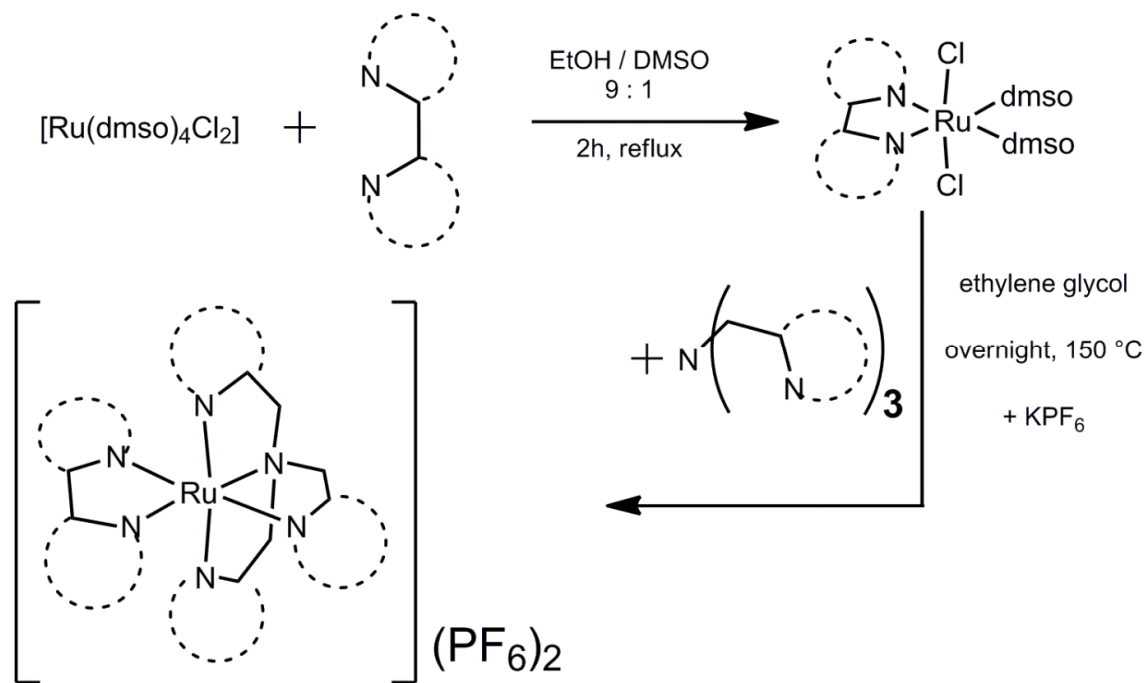

**Scheme S5.** General synthetic route for complexes  $1^{2+}$ – $8^{2+}$ .

**$[\text{Ru}(\text{L}^1)(\text{bpy})](\text{PF}_6)_2$   $\{1(\text{PF}_6)_2\}$ :**  $[\text{Ru}(\text{bpy})(\text{dmsO})_2\text{Cl}_2]$  (81 mg, 0.17 mmol), TPA ( $\text{L}^1$ ) (50 mg, 0.17 mmol), and  $\text{KPF}_6$  (80 mg, 0.43 mmol) were heated overnight at  $150^\circ\text{C}$  in ethylene glycol (10 mL), which was purged with nitrogen prior to the reaction. After the mixture had cooled down to room temperature, water (20 mL) and excess  $\text{KPF}_6$  (312 mg, 1.7 mmol) were added to induce precipitation of the product. The orange precipitate was filtered off and redissolved in acetone/DCM (1:1, 15 mL). The organic phase was washed three times with water (5 mL) and dried over  $\text{Na}_2\text{SO}_4$ . The solvents were removed under reduced pressure, and the resulting crude solid was purified by column chromatography on aluminum oxide. After starting with pure DCM, the eluent was slowly changed to DCM/methanol (98:2) to extract the product. Evaporation of the solvent under reduced pressure yielded the pure product (116 mg, 82% yield).  $^1\text{H}$  NMR (400 MHz, acetone- $d_6$ ):  $\delta$  = 9.90 (d,  $J$  = 5.7 Hz, 1H, *bpy*), 9.49 (d,  $J$  = 5.8 Hz, 1H, *py*<sub>eq</sub>), 9.37 (d,  $J$  = 5.8 Hz, 1H, *bpy*), 8.78 (d,  $J$  = 8.4 Hz, 1H, *bpy*), 8.66 (d,  $J$  = 8.4 Hz, 1H, *bpy*), 8.34 (t,  $J$  = 7.8 Hz, 1H, *py*<sub>eq</sub>), 8.08 (t,  $J$  = 7.4 Hz, 1H, *bpy*), 8.03 (t,  $J$  = 8.1 Hz, 1H, *bpy*), 7.96 (d,  $J$  = 5.6 Hz, 2H, *py*<sub>ax</sub>), 7.78 (t,  $J$  = 7.7 Hz, 1H, *bpy*), 7.72 (t,  $J$  = 7.8 Hz, 2H, *py*<sub>ax</sub>), 7.57 (t,  $J$  = 7.4 Hz, 1H, *bpy*), 7.55–7.50 (m, 3H, *py*<sub>eq</sub> + *py*<sub>ax</sub>), 7.40 (t,  $J$  = 7.4 Hz, 1H, *py*<sub>eq</sub>), 7.12 (t,  $J$  = 6.74 Hz, 2H, *py*<sub>ax</sub>), 5.87 (d,  $J$  = 17.1 Hz, 2H,  $\text{CH}_2(\text{ax})$ ), 5.42 (d,  $J$  = 17.2 Hz, 2H,  $\text{CH}_2(\text{ax})$ ), 5.01 (s, 2H,  $\text{CH}_2(\text{eq})$ ) ppm.  $^1\text{H}$  NMR (400 MHz, acetonitrile- $d_3$ )  $\delta$  = 9.53 (d,  $J$  = 5.9 Hz, 1H, *bpy*), 9.01 (d,  $J$  = 5.9 Hz, 1H, *py*<sub>eq</sub>), 8.98 (d,  $J$  = 5.6 Hz, 1H, *bpy*), 8.46 (d,  $J$  = 8.1 Hz, 1H, *bpy*), 8.35 (d,  $J$  = 8.4 Hz, 1H, *bpy*), 8.19 (t,  $J$  = 8.0 Hz, 1H, *bpy*), 7.94–7.86 (m, 2H, *bpy* + *py*<sub>eq</sub>), 7.67–7.61 (m, 3H, *py*<sub>ax</sub> + *py*<sub>eq</sub>), 7.58 (t,  $J$  = 7.8 Hz, 2H, *py*<sub>ax</sub>), 7.44 (t,  $J$  = 5.7 Hz, 1H, *bpy*), 7.32–7.27 (m, 3H, *py*<sub>ax</sub> + *bpy*), 7.25 (t,  $J$  = 7.4 Hz, 1H, *py*<sub>eq</sub>), 6.96 (t,  $J$  = 5.9 Hz, 2H, *py*<sub>ax</sub>), 5.40 (d,  $J$  = 17.2 Hz, 2H,  $\text{CH}_2(\text{ax})$ ), 5.04 (d,  $J$  = 17.1 Hz, 1H,  $\text{CH}_2(\text{ax})$ ), 4.63 (s, 2H,  $\text{CH}_2(\text{eq})$ ) ppm.  $\text{C}_{28}\text{H}_{26}\text{N}_6\text{P}_2\text{F}_{12}\text{Ru}$ : calcd. C 40.15, H 3.13, N 10.03; found C 40.28, H 4.09, N 10.07. UV/Vis (DCM):  $\lambda$  [nm] ( $\epsilon$  [ $\text{M}^{-1}\text{cm}^{-1}$ ]) = 249 (28210), 295 (31010), 370 (13880), 425 (11930), 452 (10090) sh.

**$[\text{Ru}(\text{L}^2)(\text{bpy})](\text{PF}_6)_2$   $\{2(\text{PF}_6)_2\}$ :** The complex was prepared analogously to  $1(\text{PF}_6)_2$ .  $[\text{Ru}(\text{bpy})(\text{dmsO})_2\text{Cl}_2]$  (97 mg, 0.20 mmol),  $\text{L}^2$  (74 mg, 0.20 mmol), and  $\text{KPF}_6$  (92 mg, 0.50 mmol)

yielded pure **2**(PF<sub>6</sub>)<sub>2</sub> after column chromatography (143 mg, 78% yield). <sup>1</sup>H NMR (400 MHz, acetonitrile-d<sub>3</sub>): δ = 10.65 (d, *J* = 5.8 Hz, 1H, *bpy*), 9.09 (d, *J* = 5.7 Hz, 1H, *bpy*), 8.44 (d, *J* = 8.4 Hz, 1H, *bpy*), 8.34 (d, *J* = 7.9 Hz, 1H, *bpy*), 8.13 (dd, *J* = 8.1, 7.5 Hz, 1H, *bpy*), 7.92 (dd, *J* = 8.1, 7.4 Hz, 1H, *bpy*), 7.83 (dd, *J* = 7.3, 5.8 Hz, 1H, *bpy*), 7.68 (s, 1H, *triazole*), 7.57 (td, *J* = 7.8, 1.6 Hz, 2H, *py<sub>ax</sub>*), 7.50 (dd, *J* = 7.5, 5.8 Hz, 1H, *bpy*), 7.47 (dd, *J* = 5.6, 1.6 Hz, 2H, *py<sub>ax</sub>*), 7.34–7.25 (m, 5H, *Ph*–CH<sub>2</sub>–*triazole* + *py<sub>ax</sub>*), 7.03–6.98 (m, 2H, *Ph*–CH<sub>2</sub>–*triazole*), 6.95 (dd, *J* = 7.8, 5.6 Hz, 2H, *py<sub>ax</sub>*), 5.57 (s, 2H, *Ph*–CH<sub>2</sub>–*triazole*), 5.42 (d, *J* = 16.7 Hz, 2H, CH<sub>2</sub>(ax)–N<sub>amine</sub>), 5.03 (d, *J* = 16.7 Hz, 2H, CH<sub>2</sub>(ax)–N<sub>amine</sub>), 4.38 (s, 2H, CH<sub>2</sub>(eq)–N<sub>amine</sub>) ppm. <sup>1</sup>H NMR (400 MHz, acetone-d<sub>6</sub>): δ = 10.87 (d, *J* = 5.8 Hz, 1H, *bpy*), 9.60 (d, *J* = 5.5 Hz, 1H, *bpy*), 8.75 (d, *J* = 8.1 Hz, 1H, *bpy*), 8.65 (d, *J* = 8.3 Hz, 1H, *bpy*), 8.28 (d, *J* = 8.1 Hz, 1H, *bpy*), 8.12 (s, 1H, *triazole*), 8.06 (dd, *J* = 8.8, 7.4 Hz, 1H, *bpy*), 7.97 (dd, *J* = 7.4, 5.9, 1H, *bpy*), 7.76–7.68 (m, 4H, *py<sub>ax</sub>*), 7.64 (dd, *J* = 7.4, 5.8 Hz, 1H, *bpy*), 7.54 (d, *J* = 8.0, 2H, *py<sub>ax</sub>*), 7.34–7.27 (m, 3H, *Ph*–CH<sub>2</sub>–*triazole*), 7.15–7.07 (m, 4H, *py<sub>ax</sub>* + *Ph*–CH<sub>2</sub>–*triazole*), 5.89 (d, *J* = 16.8 Hz, 2H, CH<sub>2</sub>(ax)–N<sub>amine</sub>), 5.78 (s, 2H, *Ph*–CH<sub>2</sub>–*triazole*), 5.42 (d, *J* = 16.7 Hz, 2H, CH<sub>2</sub>(ax)–N<sub>amine</sub>), 4.80 (s, 2H, CH<sub>2</sub>(eq)–N<sub>amine</sub>) ppm. C<sub>32</sub>H<sub>30</sub>N<sub>6</sub>P<sub>2</sub>F<sub>12</sub>Ru·1.5H<sub>2</sub>O: calcd. C 40.69, H 3.48, N 11.86; found C 40.70, H 3.23, N 11.81. UV/Vis (DCM): λ [nm] (ε [M<sup>-1</sup> cm<sup>-1</sup>]) = 249 (23760), 295 (33400), 337 (12050) sh, 384 (14370), 457 (8760).

**[Ru(L<sup>3</sup>)(bpy)](PF<sub>6</sub>)<sub>2</sub> {**3**(PF<sub>6</sub>)<sub>2</sub>}**: The complex was prepared analogously to **1**(PF<sub>6</sub>)<sub>2</sub>. However, after addition of water and excess KPF<sub>6</sub>, precipitation was not complete, and the precipitate was too fine to be filtered off completely. The ethylene glycol/water phase was therefore extracted with acetone/DCM (1:1, 15 mL) three times. The combined organic phases were washed with water (15 mL) once and dried over Na<sub>2</sub>SO<sub>4</sub>. After evaporation of the solvents under reduced pressure, the resulting orange crude product was purified by column chromatography analogously to **1**(PF<sub>6</sub>)<sub>2</sub>. [Ru(bpy)(dmsO)<sub>2</sub>Cl<sub>2</sub>] (97 mg, 0.15 mmol), L<sup>3</sup> (68 mg, 0.15 mmol), and KPF<sub>6</sub> (80 mg, 0.43 mmol) yielded pure **3**(PF<sub>6</sub>)<sub>2</sub> (127 mg, 85% yield). <sup>1</sup>H NMR (400 MHz, acetone-d<sub>6</sub>): δ = 10.83 (d, *J* = 5.6 Hz, 1H, *bpy*), 9.50 (d, *J* = 5.6 Hz, 1H, *bpy*), 8.66 (d, *J* = 8.2 Hz, 1H, *bpy*), 8.59 (d, *J* = 8.2 Hz, 1H, *bpy*), 8.21 (dd, *J* = 8.9, 7.7 Hz, 1H, *bpy*), 8.12 (s, 1H, *triazole<sub>eq</sub>*), 8.08 (s, 1H, *triazole<sub>ax</sub>*), 8.04 (dd, *J* = 8.5, 7.7 Hz, 1H, *bpy*), 7.89 (dd, *J* = 7.3, 5.7 Hz, 1H, *bpy*), 7.73 (d, *J* = 5.6 Hz, 1H, *py<sub>ax</sub>*), 7.68 (dd, *J* = 8.0, 7.7 Hz, 1H, *py<sub>ax</sub>*), 7.60 (dd, *J* = 8.0, 6.0 Hz, 1H, *bpy*), 7.47 (d, *J* = 8.0 Hz, 1H, *py<sub>ax</sub>*), 7.38–7.19 (m, 8H, *Ph*–CH<sub>2</sub>–*triazole<sub>eq/ax</sub>*), 7.10–7.03 (m, 3H, *py<sub>ax</sub>* + *Ph*–CH<sub>2</sub>–*triazole<sub>eq</sub>*), 5.83 (d, *J* = 16.9 Hz, 1H, *py*–CH<sub>2</sub>(ax)–N<sub>amine</sub>), 5.80 (d, *J* = 14.8 Hz, 1H, *Ph*–CH<sub>2</sub>–*triazole<sub>eq</sub>*), 5.72 (d, *J* = 14.9 Hz, 1H, *Ph*–CH<sub>2</sub>–*triazole<sub>eq</sub>*), 5.49 (d, *J* = 15.8 Hz, 1H, *triazole<sub>ax</sub>*–CH<sub>2</sub>(ax)–N<sub>amine</sub>), 5.42 (s, 2H, *Ph*–CH<sub>2</sub>–*triazole<sub>ax</sub>*), 5.36 (d, *J* = 16.9 Hz, 1H, *py*–CH<sub>2</sub>(ax)–N<sub>amine</sub>), 5.21 (d, *J* = 16.0 Hz, 1H, *triazole<sub>ax</sub>*–CH<sub>2</sub>(ax)–N<sub>amine</sub>), 4.79 (d, *J* = 17.1 Hz, 1H, *triazole<sub>eq</sub>*–CH<sub>2</sub>(eq)–N<sub>amine</sub>), 4.60 (d, *J* = 17.0 Hz, 1H, *triazole<sub>eq</sub>*–CH<sub>2</sub>(eq)–N<sub>amine</sub>) ppm. <sup>1</sup>H NMR (400 MHz, acetonitrile-d<sub>3</sub>): δ = 10.62 (d, *J* = 5.9 Hz, 1H, *bpy*), 9.03 (d, *J* = 5.6 Hz, 1H, *bpy*), 8.41 (d, *J* = 8.2 Hz, 1H, *bpy*), 8.33 (d, *J* = 8.2 Hz, 1H, *bpy*), 8.11 (dd, *J* = 8.2, 7.5 Hz, 1H, *bpy*), 7.93 (dd, *J* = 8.4, 7.6 Hz, 1H, *bpy*), 7.77 (dd, *J* = 7.3, 5.7 Hz, 1H, *bpy*), 7.73 (s, 1H, *triazole<sub>ax</sub>*), 7.70 (s, 1H, *triazole<sub>eq</sub>*), 7.55 (dd, *J* = 8.0, 7.8 Hz, 1H, *py<sub>ax</sub>*), 7.51–7.47 (m, 2H, *bpy*, *py<sub>ax</sub>*), 7.33–7.22 (m, 7H, *py<sub>ax</sub>* + *Ph*–CH<sub>2</sub>–*triazole<sub>eq/ax</sub>*), 7.13–7.09 (m, 2H, *Ph*–CH<sub>2</sub>–*triazole<sub>ax</sub>*), 6.98–6.94 (m, 2H, *Ph*–CH<sub>2</sub>–*triazole<sub>eq</sub>*), 6.92 (dd, *J* = 7.8, 5.8 Hz, 1H, *py<sub>ax</sub>*), 5.63 (d, *J* = 15.0 Hz, 1H, *Ph*–CH<sub>2</sub>–*triazole<sub>eq</sub>*), 5.51 (d, *J* = 15.0 Hz, 1H, *Ph*–CH<sub>2</sub>–*triazole<sub>eq</sub>*), 5.40 (d, *J* = 16.7 Hz, 1H, *py*–CH<sub>2</sub>(ax)–N<sub>amine</sub>), 5.24 (s, 2H, *Ph*–CH<sub>2</sub>–*triazole<sub>ax</sub>*), 5.06 (d, *J* = 15.8 Hz, 1H, *triazole<sub>ax</sub>*–CH<sub>2</sub>(ax)–N<sub>amine</sub>), 5.01 (d, *J* = 16.8, 1H, *py*–CH<sub>2</sub>(ax)–N<sub>amine</sub>), 4.87 (d, *J* = 16.0 Hz, 1H, *triazole<sub>ax</sub>*–CH<sub>2</sub>(ax)–N<sub>amine</sub>), 4.42 (d, *J* = 16.9 Hz, 1H, *triazole<sub>eq</sub>*–CH<sub>2</sub>(eq)–N<sub>amine</sub>), 4.24 (d, *J* = 16.9 Hz, 1H, *triazole<sub>eq</sub>*–CH<sub>2</sub>(eq)–N<sub>amine</sub>) ppm. C<sub>36</sub>H<sub>34</sub>N<sub>10</sub>P<sub>2</sub>F<sub>12</sub>Ru·1.1H<sub>2</sub>O: calcd. C 42.49, H 3.59, N 13.77; found C 42.54, H 3.48, N 13.71. UV/Vis (DCM): λ [nm] (ε [M<sup>-1</sup> cm<sup>-1</sup>]) = 250 (16140), 293 (33030), 334 (11690), 367 (10530) sh, 450 (6810).

**[Ru(L<sup>4</sup>)(bpy)](PF<sub>6</sub>)<sub>2</sub> {**4**(PF<sub>6</sub>)<sub>2</sub>}**: The complex was prepared analogously to **3**(PF<sub>6</sub>)<sub>2</sub>. [Ru(bpy)(dmsO)<sub>2</sub>Cl<sub>2</sub>] (97 mg, 0.20 mmol), L<sup>4</sup> (106 mg, 0.20 mmol), and KPF<sub>6</sub> (92 mg, 0.50 mmol) yielded **4**(PF<sub>6</sub>)<sub>2</sub>. Because evaporation of the solvent from the eluted product fraction only yielded the product as an oily solid, **4**(PF<sub>6</sub>)<sub>2</sub> was precipitated by adding a concentrated solution of the complex in acetone to an excess volume of Et<sub>2</sub>O, which afforded an orange powder (166 mg, 77% yield). <sup>1</sup>H NMR (400 MHz, acetone-d<sub>6</sub>): δ = 10.84 (d, *J* = 5.7 Hz, 1H, *bpy*), 9.43 (d, *J* = 5.7 Hz, 1H, *bpy*), 8.64 (d, *J* = 8.2 Hz, 1H, *bpy*), 8.59 (d, *J* = 8.1 Hz, 1H, *bpy*), 8.21 (dd, *J* = 8.0, 7.8 Hz, 1H, *bpy*), 8.09 (s, 1H, *triazole<sub>eq</sub>*), 8.08 (s, 2H, *triazole<sub>ax</sub>*), 8.07 (dd, 1H, *bpy*), 7.84 (dd, *J* = 7.4, 5.8 Hz, 1H, *bpy*), 7.59 (dd, *J* = 7.3, 5.7 Hz, 1H, *bpy*), 7.43–7.38 (m, 5H, *Ph*–CH<sub>2</sub>–*triazole*), 7.29–7.21 (m, 6H, *Ph*–CH<sub>2</sub>–*triazole*), 7.04–6.98 (m, 4H, *Ph*–CH<sub>2</sub>–*triazole*), 5.75 (s, 2H, *Ph*–CH<sub>2</sub>–*triazole<sub>eq</sub>*), 5.48 (d, *J* = 16.1 Hz, 2H, *triazole<sub>ax</sub>*–CH<sub>2</sub>–N<sub>amine</sub>), 5.40 (s, 4H, *Ph*–CH<sub>2</sub>–*triazole<sub>ax</sub>*), 5.19 (d, *J* = 16.2 Hz, 2H, *triazole<sub>ax</sub>*–CH<sub>2</sub>–N<sub>amine</sub>), 4.63 (s, 2H, *triazole<sub>eq</sub>*–CH<sub>2</sub>–N<sub>amine</sub>) ppm. <sup>1</sup>H NMR (400 MHz, acetonitrile-d<sub>3</sub>): δ = 10.61 (d, *J* = 5.8 Hz, 1H, *bpy*), 8.96 (d, *J* = 5.3 Hz, 1H, *bpy*), 8.37 (d, *J* = 8.1 Hz, 1H, *bpy*), 8.30 (d, *J* = 9.2 Hz, 1H, *bpy*), 8.08 (d, *J* = 8.2 Hz, 1H, *bpy*), 7.93 (dd, *J* = 8.3, 7.6 Hz, 1H, *bpy*), 7.72 (dd, 1H, *bpy*), 7.72 (s, 1H, *triazole<sub>eq</sub>*), 7.69

(s, 2H, *triazole<sub>ax</sub>*), 7.48 (dd,  $J = 7.4, 5.7$  Hz, 1H, *bpy*), 7.42–7.35 (m, 3H, *Ph-CH<sub>2</sub>-triazole*), 7.34–7.20 (m, 8H, *Ph-CH<sub>2</sub>-triazole*), 6.97–6.88 (m, 4H, *Ph-CH<sub>2</sub>-triazole*), 5.57 (s, 2H, *Ph-CH<sub>2</sub>-triazole<sub>eq</sub>*), 5.22 (s, 4H, *Ph-CH<sub>2</sub>-triazole<sub>ax</sub>*), 5.05 (d,  $J = 16.0$  Hz, 2H, *triazole<sub>ax</sub>-CH<sub>2</sub>-N<sub>amine</sub>*), 4.84 (d,  $J = 16.1$  Hz, 2H, *triazole<sub>ax</sub>-CH<sub>2</sub>-N<sub>amine</sub>*), 4.28 (s, 2H, *triazole<sub>eq</sub>-CH<sub>2</sub>-N<sub>amine</sub>*) ppm.  $C_{40}H_{38}N_{12}P_2F_{12}Ru \cdot Et_2O$ : calcd. C 45.88, H 4.20, N 14.59; found C 46.34, H 4.65, N 15.27. UV/Vis (DCM):  $\lambda$  [nm] ( $\epsilon$  [ $M^{-1} cm^{-1}$ ]) = 245 (10830), 255 (10040) sh, 292 (29980), 326 (11800) sh, 446 (4920).

**[Ru(L<sup>4</sup>)(L<sup>7</sup>)](PF<sub>6</sub>)<sub>2</sub> {5(PF<sub>6</sub>)<sub>2</sub>}**: [Ru(dmsO)<sub>4</sub>Cl<sub>2</sub>] (0.5 mmol, 242 mg) and L<sup>7</sup> (0.5 mmol, 118 mg) were heated at reflux for 2 h in an ethanol/DMSO mixture (9:1, 10 mL). The mixture was allowed to cool down, and crude [Ru(L<sup>7</sup>)(dmsO)<sub>2</sub>Cl<sub>2</sub>] was filtered off as a yellow precipitate and washed with cold ethanol. The crude product was used without further purification (152 mg, 54% yield). <sup>1</sup>H NMR (400 MHz, DMSO-d<sub>6</sub>):  $\delta$  = 9.51 (d,  $J = 5.9$  Hz, 1H, *py-triazole*), 8.47 (s, 1H, *py-triazole*), 7.39 (d,  $J = 7.3$  Hz, 1H, *py-triazole*), 7.27 (t,  $J = 7.3$  Hz, 1H, *py-triazole*), 6.76 (t,  $J = 7.3$  Hz, 1H, *py-triazole*), 6.67–6.56 (m, 5H, *Ph-CH<sub>2</sub>-triazole*), 5.08 (s, 2H, *Ph-CH<sub>2</sub>-triazole*), 2.59 (s, 12H, *Ru-dmsO*) ppm. MS (+ESI):  $m/z$  = 588.9678 [M + Na]<sup>+</sup>.

The target complex was prepared analogously to 3(PF<sub>6</sub>)<sub>2</sub>. [Ru(L<sup>7</sup>)(dmsO)<sub>2</sub>Cl<sub>2</sub>] (56 mg, 0.10 mmol), L<sup>4</sup> (53 mg, 0.10 mmol), and KPF<sub>6</sub> (46 mg, 0.25 mmol) afforded pure 5(PF<sub>6</sub>)<sub>2</sub> (85 mg, 73% yield) as a yellow solid after column chromatography. <sup>1</sup>H NMR (400 MHz, acetone-d<sub>6</sub>):  $\delta$  = 10.59 (d,  $J = 5.9$  Hz, 1H, *py-triazole*), 9.07 (s, 1H, *py-triazole*), 8.28 (d,  $J = 8.0$  Hz, 1H, *py-triazole*), 8.17 (td,  $J = 7.8, 1.5$  Hz, 1H, *py-triazole*), 8.13 (s, 2H, *triazole<sub>ax</sub>*), 8.07 (s, 1H, *triazole<sub>eq</sub>*), 7.79 (dd,  $J = 7.4, 5.7$  Hz, 1H, *py-triazole*), 7.47–7.25 (m, 16H, *Ph-CH<sub>2</sub>-triazole*), 7.10–7.03 (m, 4H, *Ph-CH<sub>2</sub>-triazole*), 5.86 (s, 2H, *Ph-CH<sub>2</sub>-triazole*), 5.78 (s, 2H, *Ph-CH<sub>2</sub>-triazole*), 5.49 (d,  $J = 14.9$  Hz, 2H, *triazole<sub>ax</sub>-CH<sub>2</sub>-N<sub>amine</sub>*), 5.45 (s, 4H, *Ph-CH<sub>2</sub>-triazole<sub>ax</sub>*), 5.22 (d,  $J = 14.8$  Hz, 2H, *triazole<sub>ax</sub>-CH<sub>2</sub>-N<sub>amine</sub>*), 4.61 (s, 2H, *triazole<sub>eq</sub>-CH<sub>2</sub>-N<sub>amine</sub>*) ppm. <sup>1</sup>H NMR (400 MHz, acetonitrile-d<sub>3</sub>)  $\delta$  = 10.33 (d,  $J = 5.7$  Hz, 1H, *py-triazole*), 8.50 (s, 1H, *py-triazole*), 8.04–7.94 (m, 2H, *py-triazole*), 7.71 (s, 2H, *triazole<sub>ax</sub>*), 7.67 (s, 1H, *triazole<sub>eq</sub>*), 7.63 (dd,  $J = 7.0, 5.7$  Hz, 1H, *py-triazole*), 7.42–7.21 (m, 16H, *Ph-CH<sub>2</sub>-triazole*), 6.97–6.91 (m, 4H, *Ph-CH<sub>2</sub>-triazole*), 5.60 (s, 2H, *Ph-CH<sub>2</sub>-triazole*), 5.55 (s, 2H, *Ph-CH<sub>2</sub>-triazole*), 5.24 (s, 4H, *Ph-CH<sub>2</sub>-triazole<sub>ax</sub>*), 5.18 (d,  $J = 14.7$  Hz, 2H, *triazole<sub>ax</sub>-CH<sub>2</sub>-N<sub>amine</sub>*), 4.85 (d,  $J = 14.8$  Hz, 2H, *triazole<sub>ax</sub>-CH<sub>2</sub>-N<sub>amine</sub>*), 4.23 (s, 2H, *triazole<sub>eq</sub>-CH<sub>2</sub>-N<sub>amine</sub>*) ppm.  $C_{44}H_{42}N_{14}P_2F_{12}Ru \cdot 0.7H_2O$ : calcd. C 45.15, H 3.74, N 16.75; found C 45.30, H 3.89, N 16.60. UV/Vis (DCM):  $\lambda$  [nm] ( $\epsilon$  [ $M^{-1} cm^{-1}$ ]) = 236 (13570), 274 (25460), 320 (15410), 386 (7630).

**[Ru(L<sup>4</sup>)(L<sup>8</sup>)](PF<sub>6</sub>)<sub>2</sub> {6(PF<sub>6</sub>)<sub>2</sub>}**: [Ru(dmsO)<sub>4</sub>Cl<sub>2</sub>] (0.5 mmol, 242 mg) and L<sup>8</sup> (0.5 mmol, 158 mg) were heated at reflux for 2 h in an ethanol/DMSO mixture (9:1, 10 mL). The mixture was allowed to cool down, and crude [Ru(L<sup>8</sup>)(dmsO)<sub>2</sub>Cl<sub>2</sub>] was filtered off as a light yellow precipitate and washed with cold ethanol. The crude product was used without further purification (202 mg, 63% yield). <sup>1</sup>H NMR (400 MHz, DMSO-d<sub>6</sub>):  $\delta$  = 7.97 (s, 2H, *Ph-CH<sub>2</sub>-triazole*), 6.64–6.53 (m, 10H, *Ph-CH<sub>2</sub>-triazole*), 5.02 (s, 4H, *Ph-CH<sub>2</sub>-triazole*) ppm. MS (+ESI):  $m/z$  = 667.0032 [M + Na]<sup>+</sup>.

The target complex was prepared analogously to 3(PF<sub>6</sub>)<sub>2</sub>. [Ru(L<sup>8</sup>)(dmsO)<sub>2</sub>Cl<sub>2</sub>] (64 mg, 0.10 mmol), L<sup>4</sup> (53 mg, 0.10 mmol), and KPF<sub>6</sub> (46 mg, 0.25 mmol) afforded 6(PF<sub>6</sub>)<sub>2</sub>. Because evaporation of the solvent from the eluted product fraction only yielded the product as an oily solid, 6(PF<sub>6</sub>)<sub>2</sub> was precipitated by adding a concentrated solution of the complex in acetone to an excess volume of Et<sub>2</sub>O, which afforded an almost colorless powder (83 mg, 67% yield). <sup>1</sup>H NMR (400 MHz, acetone-d<sub>6</sub>):  $\delta$  = 8.73 (s, 1H, *triazole-triazole*), 8.63 (s, 1H, *triazole-triazole*), 8.09 (s, 2H, *triazole<sub>ax</sub>*), 7.92 (s, 1H, *triazole<sub>eq</sub>*), 7.55–7.51 (m, 2H, *Ph-CH<sub>2</sub>-triazole*), 7.49–7.23 (m, 19H, *Ph-CH<sub>2</sub>-triazole*), 7.09–7.04 (m, 4H, *Ph-CH<sub>2</sub>-triazole*), 6.04 (s, 2H, *Ph-CH<sub>2</sub>-triazole*), 5.78 (s, 2H, *Ph-CH<sub>2</sub>-triazole*), 5.67 (s, 2H, *Ph-CH<sub>2</sub>-triazole*), 5.43 (d,  $J = 15.0$  Hz, 2H, *triazole<sub>ax</sub>-CH<sub>2</sub>-N<sub>amine</sub>*), 5.43 (s, 4H, *Ph-CH<sub>2</sub>-triazole<sub>ax</sub>*), 5.18 (d,  $J = 14.8$  Hz, 2H, *triazole<sub>ax</sub>-CH<sub>2</sub>-N<sub>amine</sub>*), 4.59 (s, 2H, *triazole<sub>eq</sub>-CH<sub>2</sub>-N<sub>amine</sub>*) ppm. <sup>1</sup>H NMR (400 MHz, acetonitrile-d<sub>3</sub>):  $\delta$  = 8.38 (s, 1H, *triazole-triazole*), 8.20 (s, 1H, *triazole-triazole*), 7.71 (s, 2H, *triazole<sub>ax</sub>*), 7.59 (s, 1H, *triazole<sub>eq</sub>*), 7.45–7.22 (m, 19H, *Ph-CH<sub>2</sub>-triazole*), 7.22–7.16 (m, 2H, *Ph-CH<sub>2</sub>-triazole*), 6.99–6.95 (m, 4H, *Ph-CH<sub>2</sub>-triazole*), 5.83 (s, 2H, *Ph-CH<sub>2</sub>-triazole*), 5.57 (s, 2H, *Ph-CH<sub>2</sub>-triazole*), 5.47 (s, 2H, *Ph-CH<sub>2</sub>-triazole*), 5.26 (s, 4H, *Ph-CH<sub>2</sub>-triazole<sub>ax</sub>*), 5.16 (d,  $J = 14.3$  Hz, 2H, *triazole<sub>ax</sub>-CH<sub>2</sub>-N<sub>amine</sub>*), 4.84 (d,  $J = 14.7$  Hz, 2H, *triazole<sub>ax</sub>-CH<sub>2</sub>-N<sub>amine</sub>*), 4.26 (s, 2H, *triazole<sub>eq</sub>-CH<sub>2</sub>-N<sub>amine</sub>*) ppm.  $C_{48}H_{46}N_{16}P_2F_{12}Ru \cdot Et_2O$ : calcd. C 47.60, H 4.30, N 17.08; found C 48.10, H 4.35, N 17.58. UV/Vis (DCM):  $\lambda$  [nm] ( $\epsilon$  [ $M^{-1} cm^{-1}$ ]) = 233 (30630), 325 (25180).

**[Ru(L<sup>1</sup>)(L<sup>8</sup>)](PF<sub>6</sub>)<sub>2</sub> {7(PF<sub>6</sub>)<sub>2</sub>}**: The target complex was prepared analogously to 6(PF<sub>6</sub>)<sub>2</sub>. [Ru(L<sup>8</sup>)(dmsO)<sub>2</sub>Cl<sub>2</sub>] (64 mg, 0.10 mmol), L<sup>1</sup> (29 mg, 0.10 mmol), and KPF<sub>6</sub> (46 mg, 0.25 mmol) afforded 7(PF<sub>6</sub>)<sub>2</sub>. Because evaporation of the solvent from the eluted product fraction only yielded the product

as an oily solid, **6**(PF<sub>6</sub>)<sub>2</sub> was precipitated by adding a concentrated solution of the complex in acetone to an excess volume of Et<sub>2</sub>O, which afforded a yellow powder (90 mg, 90% yield). <sup>1</sup>H NMR (400 MHz, acetone-d<sub>6</sub>): δ = 10.29 (d, *J* = 5.7 Hz, 1H, *py*<sub>eq</sub>), 8.89 (s, 1H, *triazole*–*triazole*), 8.70 (s, 1H, *triazole*–*triazole*), 7.93 (d, *J* = 5.5 Hz, 2H, *py*<sub>ax</sub>), 7.81–7.73 (m, 3H, *py*<sub>ax</sub> + *py*<sub>eq</sub>), 7.69–7.65 (m, 2H, *Ph*–CH<sub>2</sub>–*triazole*), 7.60 (d, *J* = 7.8 Hz, 2H, *py*<sub>ax</sub>), 7.56–7.45 (m, 4H, *Ph*–CH<sub>2</sub>–*triazole* + *py*<sub>eq</sub>), 7.39–7.29 (m, 6H, *Ph*–CH<sub>2</sub>–*triazole*), 7.12 (dd, *J* = 8.0, 5.3 Hz, 2H, *py*<sub>ax</sub>), 6.14 (s, 2H, *Ph*–CH<sub>2</sub>–*triazole*), 5.83 (d, *J* = 15.4 Hz, 2H, *py*<sub>ax</sub>–CH<sub>2</sub>–N<sub>amine</sub>), 5.83 (s, 2H, *Ph*–CH<sub>2</sub>–*triazole*), 5.41 (d, *J* = 15.3 Hz, 2H, *py*<sub>ax</sub>–CH<sub>2</sub>–N<sub>amine</sub>), 5.13 (s, 2H, *py*<sub>eq</sub>–CH<sub>2</sub>–N<sub>amine</sub>) ppm. <sup>1</sup>H NMR (400 MHz, acetonitrile-d<sub>3</sub>): δ = 10.04 (d, *J* = 5.7 Hz, 1H, *py*<sub>eq</sub>), 8.40 (s, 1H, *triazole*–*triazole*), 8.18 (s, 1H, *triazole*–*triazole*), 7.67 (d, *J* = 5.5 Hz, 2H, *py*<sub>ax</sub>), 7.64–7.54 (m, 5H, *py*<sub>ax</sub> + *py*<sub>eq</sub> + *Ph*–CH<sub>2</sub>–*triazole*), 7.52–7.44 (m, 3H, *py*<sub>eq</sub> + *Ph*–CH<sub>2</sub>–*triazole*), 7.37 (d, *J* = 8.0 Hz, 2H, *py*<sub>ax</sub>), 7.34–7.26 (m, 4H, *Ph*–CH<sub>2</sub>–*triazole*), 7.24–7.20 (m, 2H, *Ph*–CH<sub>2</sub>–*triazole*), 7.13 (d, *J* = 7.8 Hz, 1H, *py*<sub>eq</sub>), 6.97 (dd, *J* = 7.7, 5.6 Hz, 2H, *py*<sub>ax</sub>), 5.91 (s, 2H, *Ph*–CH<sub>2</sub>–*triazole*), 5.57 (s, 2H, *Ph*–CH<sub>2</sub>–*triazole*), 5.52 (d, *J* = 15.5 Hz, 2H, *py*<sub>ax</sub>–CH<sub>2</sub>–N<sub>amine</sub>), 5.03 (d, *J* = 15.4 Hz, 2H, *py*<sub>ax</sub>–CH<sub>2</sub>–N<sub>amine</sub>), 4.71 (s, 2H, *py*<sub>eq</sub>–CH<sub>2</sub>–N<sub>amine</sub>) ppm. C<sub>36</sub>H<sub>34</sub>N<sub>10</sub>P<sub>2</sub>F<sub>12</sub>Ru·Et<sub>2</sub>O·H<sub>2</sub>O: C 44.08, H 4.25, N 12.85; found C 43.80, H 4.47, N 12.68. UV/Vis (DCM): λ [nm] (ε [M<sup>-1</sup> cm<sup>-1</sup>]) = 240 (18480), 286 (4670) sh, 378 (11400), 417 (5630) sh.

[Ru(L<sup>5</sup>)(bpy)](PF<sub>6</sub>)<sub>2</sub> {**8**(PF<sub>6</sub>)<sub>2</sub>}: The complex was prepared analogously to **3**(PF<sub>6</sub>)<sub>2</sub>. [Ru(bpy)(dmsO)<sub>2</sub>Cl<sub>2</sub>] (97 mg, 0.20 mmol), L<sup>5</sup> (114 mg, 0.20 mmol), and KPF<sub>6</sub> (92 mg, 0.50 mmol) yielded pure **8**(PF<sub>6</sub>)<sub>2</sub> (186 mg, 83% yield). The ratio of the two isomers **8a**<sup>2+</sup>/**8b**<sup>2+</sup> after the first column chromatography was 70:30, which is close to the expected statistical distribution of 2:1 or 67:33. Attempts to separate the isomers by slow careful column chromatography, that is, collecting the eluted product in several test tubes and recording <sup>1</sup>H NMR spectra of the fraction in each test tube, only afforded a **8a**<sup>2+</sup>/**8b**<sup>2+</sup> mixture of 60:40. However, when the compound was recrystallized from a concentrated solution in acetone by adding Et<sub>2</sub>O and keeping the solution in the freezer (–20 °C), the first fraction of crystalline material showed a **8a**<sup>2+</sup>/**8b**<sup>2+</sup> ratio of 28:72.

<sup>1</sup>H NMR (700 MHz, chloroform-d, **8a**<sup>2+</sup>/**8b**<sup>2+</sup> = 28:72): δ = 10.85 (d, *J* = 5.2 Hz, 1H, **a/b**, bpy), 9.46 (d, *J* = 5.8 Hz, 1H, **a/b**, bpy), 8.40 (s, 0.28H, **a**, *Ph*–*triazole*, axial), 8.36 (d, *J* = 8.4 Hz, 1H, **a/b**, bpy), 8.34 (s, 1.72H, **a/b**, *iPr*–*Ph*–*triazole*, axial), 8.28 (d, *J* = 8.1 Hz, 1H, **a/b**, bpy), 8.21 (s, 0.72H, **b**, *Ph*–*triazole*, equatorial), 8.16 (s, 0.28H, **a**, *iPr*–*Ph*–*triazole*, equatorial), 8.11 (td, *J* = 7.8, 1.4 Hz, 1H, **a/b**, bpy), 7.89 (t, *J* = 7.7 Hz, 1H, **a/b**, bpy), 7.76 (d, *J* = 8.8 Hz, 1.44H, **b**, *Ph*–*triazole*, equatorial), 7.75–7.72 (m, 2H, **a/b**, bpy), 7.66 (d, *J* = 8.5 Hz, 0.56H, **a**, *iPr*–*Ph*–*triazole*, equatorial), 7.57 (dd, *J* = 8.6, 7.2 Hz, 1.44H, **b**, *Ph*–*triazole*, equatorial), 7.52 (d, *J* = 7.8 Hz, 0.56H, **a**, *Ph*–*triazole*, axial), 7.51 (t, *J* = 7.3 Hz, 0.72H, **b**, *Ph*–*triazole*, equatorial), 7.41 (d, *J* = 8.8 Hz, 3.44H, **a/b**, *iPr*–*Ph*–*triazole*, axial), 7.40 (d, *J* = 8.3 Hz, 0.56H, **a**, *iPr*–*Ph*–*triazole*, equatorial), 7.39 (t, *J* = 7.6 Hz, 0.56H, **a**, *Ph*–*triazole*, axial), 7.35 (t, *J* = 7.6 Hz, 0.28H, **a**, *Ph*–*triazole*, axial), 7.23 (d, *J* = 7.3 Hz, 3.44H, **a/b**, *iPr*–*Ph*–*triazole*, axial), 5.71 (d, *J* = 15.8 Hz, 2H, **a/b**, *triazole*–CH<sub>2</sub>, axial), 5.40 (d, *J* = 15.8 Hz, 2H, **a/b**, *triazole*–CH<sub>2</sub>, axial), 4.93 (s, 2H, **a/b**, *triazole*–CH<sub>2</sub>, equatorial), 2.99 (hept, *J* = 7.1 Hz, 0.28H, **a**, *iPr*–*Ph*, equatorial), 2.88 (hept, *J* = 7.1 Hz, 1.72H, **a/b**, *iPr*–*Ph*, axial), 1.29 (d, *J* = 6.9 Hz, 1.68H, **a**, *iPr*–*Ph*, equatorial), 1.19 (d, *J* = 6.9 Hz, 1.68H, **a**, *iPr*–*Ph*, axial), 1.18 (d, *J* = 7.0 Hz, 8.64H, **b**, *iPr*–*Ph*, axial) ppm.

<sup>1</sup>H NMR (700 MHz, chloroform-d, **8a**<sup>2+</sup>/**8b**<sup>2+</sup> = 60:40): δ = 10.84 (t, *J* = 3.7 Hz, 1H, **a/b**, bpy), 9.37 (d, *J* = 5.5 Hz, 1H, **a/b**, bpy), 8.37 (d, *J* = 8.1 Hz, 1H, **a/b**, bpy), 8.36 (s, 0.60H, **a**, *Ph*–*triazole*, axial), 8.31 (s, 1.60H, **a/b**, *iPr*–*Ph*–*triazole*, axial), 8.28 (d, *J* = 7.8 Hz, 1H, **a/b**, bpy), 8.16 (s, 0.40H, **b**, *Ph*–*triazole*, equatorial), 8.12 (s, 0.60H, **a**, *iPr*–*Ph*–*triazole*, equatorial), 8.12 (tdd, *J* = 7.8, 3.7, 1.4 Hz, 1H, **a/b**, bpy), 7.87 (t, *J* = 7.6 Hz, 1H, **a/b**, bpy), 7.75 (d, *J* = 7.1 Hz, 0.80H, **b**, *Ph*–*triazole*, equatorial), 7.75–7.72 (m, 1H, **a/b**, bpy), 7.69–7.66 (m, 1H, **a/b**, bpy), 7.65 (d, *J* = 8.6 Hz, 1.2H, **a**, *iPr*–*Ph*–*triazole*, equatorial), 7.56 (t, *J* = 8.6 Hz, 0.80H, **b**, *Ph*–*triazole*, equatorial), 7.50 (d, *J* = 8.6 Hz, 1.20H, **a**, *Ph*–*triazole*, axial), 7.49 (t, *J* = 7.9 Hz, 0.40H, **b**, *Ph*–*triazole*, equatorial), 7.40 (d, *J* = 8.6 Hz, 2.80H, **a/b**, *iPr*–*Ph*–*triazole*, axial), 7.39 (d, *J* = 8.6 Hz, 1.20H, **a**, *iPr*–*Ph*–*triazole*, equatorial), 7.38 (t, *J* = 8.6 Hz, 1.20H, **a**, *Ph*–*triazole*, axial), 7.33 (t, *J* = 7.2 Hz, 0.60H, **a**, *Ph*–*triazole*, axial), 7.22 (d, *J* = 8.9 Hz, 2.80H, **a/b**, *iPr*–*Ph*–*triazole*, axial), 5.63 (d, *J* = 15.8 Hz, 2H, **a/b**, *triazole*–CH<sub>2</sub>, axial), 5.36 (d, *J* = 15.8 Hz, 2H, **a/b**, *triazole*–CH<sub>2</sub>, axial), 4.88 (s, 2H, **a/b**, *triazole*–CH<sub>2</sub>, equatorial), 2.99 (hept, *J* = 6.8 Hz, 0.60H, **a**, *iPr*–*Ph*, equatorial), 2.88 (hept, *J* = 7.1 Hz, 0.60H, **a**, *iPr*–*Ph*, axial), 2.87 (hept, *J* = 7.1 Hz, 0.80H, **b**, *iPr*–*Ph*, axial), 1.28 (d, *J* = 6.9 Hz, 3.60H, **a**, *iPr*–*Ph*, equatorial), 1.18 (d, *J* = 6.9 Hz, 3.60H, **a**, *iPr*–*Ph*, axial), 1.17 (d, *J* = 6.9 Hz, 4.80H, **b**, *iPr*–*Ph*, axial) ppm.

<sup>1</sup>H NMR (400 MHz, acetonitrile-d<sub>3</sub>, **8a**<sup>2+</sup>/**8b**<sup>2+</sup> = 60:40): δ = 10.76 (d, *J* = 5.6 Hz, 1H, **a/b**, bpy), 9.14 (d, *J* = 5.7 Hz, 1H, **a/b**, bpy), 8.42 (d, *J* = 8.3 Hz, 1H, **a/b**, bpy), 8.36 (d, *J* = 8.0 Hz, 1H, **a/b**, bpy), 8.26–8.17 (m, 3H, **a/b**, *triazole*), 8.13 (t, *J* = 7.9 Hz, 1H, **a/b**, bpy), 7.97 (t, *J* = 7.8 Hz, 1H, **a/b**, bpy), 7.85–7.80 (m), 7.75–7.70 (m), 7.63–7.50 (m), 7.47–7.39 (m), 7.36–7.27 (m), 5.28 (d, *J* = 16.1 Hz, 2H, **a/b**, *triazole*–CH<sub>2</sub>, axial), 5.06 (d, *J* = 16.0 Hz, 2H, **a/b**, *triazole*–CH<sub>2</sub>, axial), 4.52 (s, 2H, **a/b**, *triazole*–CH<sub>2</sub>,

equatorial), 2.99 (hept,  $J = 6.8$  Hz, 0.28H, **a**, *iPr*-Ph, equatorial), 2.89 (hept,  $J = 6.9$  Hz, 1.72H, **a/b**, *iPr*-Ph, axial), 1.23 (d,  $J = 6.9$  Hz, 1.68H, **a**, *iPr*-Ph, equatorial), 1.15 (d,  $J = 6.9$  Hz, 10.32H, **a/b**, *iPr*-Ph, axial) ppm.

$^1\text{H}$  NMR (400 MHz, acetone- $d_6$ ,  $8\text{a}^{2+}/8\text{b}^{2+} = 60:40$ ):  $\delta = 10.97$  (d,  $J = 5.5$  Hz, 1H, **a/b**, bpy), 9.62 (d,  $J = 5.5$  Hz, 1H, **a/b**, bpy), 8.75 (s, 0.60H, **a**, Ph-triazole, axial), 8.71 (d,  $J = 5.5$  Hz, 1H, **a/b**, bpy), 8.70 (s, 1.40H, **a/b**, *iPr*-Ph-triazole, axial), 8.68 (s, 0.40H, **b**, Ph-triazole, equatorial), 8.65 (d,  $J = 8.5$  Hz, 1H, **a/b**, bpy), 8.63 (s, 0.60H, **a**, *iPr*-Ph-triazole, equatorial), 8.28 (t,  $J = 8.0$  Hz, 1H, **a/b**, bpy), 8.11 (t,  $J = 7.7$  Hz, 1H, **a/b**, bpy), 7.97 (t,  $J = 6.4$  Hz, 1H, **a/b**, bpy), 7.95 (d,  $J = 8.0$  Hz, 0.80H, **b**, Ph-triazole, equatorial), 7.84 (d,  $J = 8.8$  Hz, 1.2H, **a**, *iPr*-Ph-triazole, equatorial), 7.69 (t,  $J = 6.7$  Hz, 1H, **a/b**, bpy), 7.62 (t,  $J = 7.4$  Hz, 0.80H, **b**, Ph-triazole, equatorial), 7.58–7.53 (m, 1.2H, **a**, Ph-triazole, axial, 0.4H, **b**, Ph-triazole, axial), 7.49 (1.2H, **a**, *iPr*-Ph-triazole, equatorial), 7.47–7.40 (m, 1.2H, **a**, Ph-triazole, axial, 0.6H, **a**, Ph-triazole, axial), 7.46 (d,  $J = 8.7$  Hz, 2.80H, **a/b**, *iPr*-Ph-triazole, axial), 7.33 (d,  $J = 8.7$  Hz, 2.80H, **a/b**, *iPr*-Ph-triazole, axial), 5.72 (d,  $J = 16.4$  Hz, 2H, **a/b**, triazole- $\text{CH}_2$ , axial), 5.44 (d,  $J = 16.4$  Hz, 2H, **a/b**, triazole- $\text{CH}_2$ , axial), 4.91 (s, 2H, **a/b**, triazole- $\text{CH}_2$ , equatorial), 3.00 (hept,  $J = 6.8$  Hz, 0.60H, **a**, *iPr*-Ph, equatorial), 2.89 (hept,  $J = 6.9$  Hz, 1.40H, **a/b**, *iPr*-Ph, axial), 1.24 (d,  $J = 6.9$  Hz, 3.60H, **a**, *iPr*-Ph, equatorial), 1.15 (d,  $J = 6.9$  Hz, 8.4H, **a**, *iPr*-Ph, axial) ppm.

$\text{C}_{43}\text{H}_{44}\text{N}_{12}\text{P}_2\text{F}_{12}\text{Ru}\cdot 0.2\text{Et}_2\text{O}$ : C 46.36, H 4.09, N 14.81; found C 46.55, H 4.19, 14.98. UV/Vis (DCM):  $\lambda$  [nm] ( $\epsilon$  [ $\text{M}^{-1}\text{cm}^{-1}$ ]) = 245 (36164), 291 (35556), 347 (23196), 441 (7010).

**[Ru(L<sup>1</sup>)(bpy)(CD<sub>3</sub>CN)](PF<sub>6</sub>)<sub>2</sub> {[1(CD<sub>3</sub>CN)](PF<sub>6</sub>)<sub>2</sub>}**: A solution of **1**(PF<sub>6</sub>)<sub>2</sub> in CD<sub>3</sub>CN (0.7 mL, 5 mmol/L) was put in an NMR tube and heated in an oil bath at 80 °C for 2 days. After the solution had cooled down an  $^1\text{H}$  NMR spectrum was recorded, which was identical to that of pure [1(CD<sub>3</sub>CN)]<sup>2+</sup> known from the literature.  $^1\text{H}$  NMR (400 MHz, acetonitrile- $d_3$ ):  $\delta = 8.89$  (d,  $J = 5.6$  Hz, 2H, *py*<sub>coord</sub>), 8.52–8.45 (m, 3H, *py*<sub>free</sub> + *bpy*), 8.32 (d,  $J = 5.6$  Hz, 2H, *bpy*), 8.10 (t,  $J = 7.9$  Hz, 2H, *bpy*), 7.77 (t,  $J = 7.8$  Hz, 2H, *py*<sub>coord</sub>), 7.68 (t,  $J = 7.7$  Hz, 1H, *py*<sub>free</sub>), 7.53 (dd,  $J = 7.7$ , 5.5 Hz, 2H, *bpy*), 7.36–7.27 (m, 5H, *py*<sub>free</sub> + *py*<sub>coord</sub>), 7.07 (d,  $J = 7.8$  Hz, 1H, *py*<sub>free</sub>), 4.62 (d,  $J = 16.8$  Hz, 2H, *CH*<sub>2</sub>(coord.)), 4.12 (d,  $J = 16.8$  Hz, 2H, *CH*<sub>2</sub>(coord.)), 3.19 (s, 2H, *CH*<sub>2</sub>(free)) ppm. UV/Vis (CH<sub>3</sub>CN):  $\lambda$  [nm] ( $\epsilon$  [ $\text{M}^{-1}\text{cm}^{-1}$ ]) = 247 (25259), 286 (33304), 347 (11938), 427 (6951).

**[Ru(L<sup>3</sup>)(bpy)(CD<sub>3</sub>CN)](PF<sub>6</sub>)<sub>2</sub> {[3(CD<sub>3</sub>CN)](PF<sub>6</sub>)<sub>2</sub>}**: A solution of **3**(PF<sub>6</sub>)<sub>2</sub> in CD<sub>3</sub>CN (0.7 mL, 5 mmol/L) was put in an NMR tube and irradiated at 369 nm. The reaction was monitored by  $^1\text{H}$  NMR, and after 16 h a maximum amount of 87% of the original complex had reacted to a new species, the  $^1\text{H}$  NMR resonances of which could be attributed to [3(CD<sub>3</sub>CN)]<sup>2+</sup> (see Discussion of the NMR results).  $^1\text{H}$  NMR (400 MHz, acetonitrile- $d_3$ ):  $\delta = 8.85$  (d,  $J = 5.6$  Hz, 1H, *py*<sub>coord</sub>), 8.48 (d,  $J = 5.5$  Hz, 1H, *bpy*), 8.46 (d,  $J = 5.3$  Hz, 1H, *bpy*), 8.29 (dd,  $J = 5.7$ , 4.8 Hz, 2H, *bpy*), 8.12–8.06 (m, 2H, *bpy*), 7.79 (td,  $J = 7.8$ , 1.5 Hz, 1H, *py*<sub>coord</sub>), 7.71 (s, 1H, triazole<sub>coord</sub>), 7.64 (s, 1H, triazole<sub>free</sub>), 7.54–7.49 (m, 2H, *bpy*), 7.36–7.29 (m, 8H, *py*<sub>coord</sub> + Ph-*CH*<sub>2</sub>-triazole), 7.22–7.18 (m, 2H, Ph-*CH*<sub>2</sub>-triazole), 7.02–6.98 (m, 2H, Ph-*CH*<sub>2</sub>-triazole), 5.61 (d,  $J = 15.3$  Hz, 1H, Ph-*CH*<sub>2</sub>-triazole<sub>coord</sub>), 5.50 (d,  $J = 15.2$  Hz, 1H, Ph-*CH*<sub>2</sub>-triazole<sub>coord</sub>), 5.47 (s, 2H, Ph-*CH*<sub>2</sub>-triazole<sub>free</sub>), 4.31 (d,  $J = 16.4$  Hz, 1H, *py*-*CH*<sub>2</sub>-N<sub>amine</sub>), 4.23 (d,  $J = 16.5$  Hz, 1H, triazole<sub>coord</sub>-*CH*<sub>2</sub>-N<sub>amine</sub>), 3.98 (d,  $J = 16.5$  Hz, 1H, *py*-*CH*<sub>2</sub>-N<sub>amine</sub>), 3.67 (d,  $J = 16.4$  Hz, 1H, triazole<sub>coord</sub>-*CH*<sub>2</sub>-N<sub>amine</sub>), 3.21 (d,  $J = 14.3$  Hz, 1H, triazole<sub>free</sub>-*CH*<sub>2</sub>-N<sub>amine</sub>), 3.13 (d,  $J = 14.2$  Hz, 1H, triazole<sub>free</sub>-*CH*<sub>2</sub>-N<sub>amine</sub>) ppm. UV/Vis (CH<sub>3</sub>CN):  $\lambda$  [nm] ( $\epsilon$  [ $\text{M}^{-1}\text{cm}^{-1}$ ]) = 246 (15859), 252 (15588), 286 (32932), 326 (10633) sh, 424 (5960).

**[Ru(L<sup>4</sup>)(bpy)(CD<sub>3</sub>CN)](PF<sub>6</sub>)<sub>2</sub> {[4(CD<sub>3</sub>CN)](PF<sub>6</sub>)<sub>2</sub>}**: A solution of **4**(PF<sub>6</sub>)<sub>2</sub> in CD<sub>3</sub>CN (0.7 mL, 5 mmol/L) was put in an NMR tube and irradiated at 369 nm. The reaction was monitored by  $^1\text{H}$  NMR, and after 4 h all of the original complex had reacted to a new species, the  $^1\text{H}$  NMR resonances of which could be attributed to [4(CD<sub>3</sub>CN)]<sup>2+</sup> (see Discussion of the NMR results). The complex was precipitated from the solution by adding Et<sub>2</sub>O, and mass spectra were measured from a solution of [4(CD<sub>3</sub>CN)]<sup>2+</sup> in DCM.  $^1\text{H}$  NMR (400 MHz, acetonitrile- $d_3$ ):  $\delta = 8.45$  (d,  $J = 8.1$  Hz, 2H, *bpy*), 8.10–8.02 (m, 4H, *bpy*), 7.82 (s, 2H, triazole<sub>coord</sub>), 7.58 (s, 1H, triazole<sub>free</sub>), 7.50 (dd,  $J = 7.6$ , 5.7 Hz, 2H, *bpy*), 7.44–7.38 (m, 6H, Ph-*CH*<sub>2</sub>-triazole), 7.32–7.27 (m, 7H, Ph-*CH*<sub>2</sub>-triazole), 7.20–7.15 (m, 2H, Ph-*CH*<sub>2</sub>-triazole), 5.58 (s, 4H, Ph-*CH*<sub>2</sub>-triazole<sub>coord</sub>), 5.44 (s, 2H, Ph-*CH*<sub>2</sub>-triazole<sub>free</sub>), 4.12 (d,  $J = 16.9$  Hz, 2H, triazole<sub>coord</sub>-*CH*<sub>2</sub>-N<sub>amine</sub>), 3.66 (d,  $J = 16.1$  Hz, 2H, triazole<sub>coord</sub>-*CH*<sub>2</sub>-N<sub>amine</sub>), 3.15 (s, 2H, triazole<sub>free</sub>-*CH*<sub>2</sub>-N<sub>amine</sub>) ppm.  $^1\text{H}$  NMR (400 MHz, acetone- $d_6$ ):  $\delta = 8.77$  (dt,  $J = 8.3$ , 1.0 Hz, 2H, *bpy*), 8.36 (dd,  $J = 5.6$ , 1.5 Hz, 2H, *bpy*), 8.24 (s, 2H, triazole<sub>coord</sub>), 8.22 (dd,  $J = 8.5$ , 7.9 Hz, 2H, *bpy*), 7.80 (s, 1H, triazole<sub>free</sub>), 7.64 (dd,  $J = 7.6$ , 5.6 Hz, 2H, *bpy*), 7.46–7.40 (m, 6H, Ph-*CH*<sub>2</sub>-triazole), 7.37 – 7.33 (m, 4H, Ph-*CH*<sub>2</sub>-triazole), 7.30–7.26 (m, 3H, Ph-*CH*<sub>2</sub>-triazole), 7.21–7.17 (m, 2H, Ph-*CH*<sub>2</sub>-triazole), 5.78 (s, 4H, Ph-*CH*<sub>2</sub>-triazole<sub>coord</sub>), 5.50 (s, 2H, Ph-*CH*<sub>2</sub>-triazole<sub>free</sub>), 4.47 (d,  $J = 16.3$  Hz, 2H, triazole<sub>coord</sub>-*CH*<sub>2</sub>-N<sub>amine</sub>), 3.98 (d,  $J = 16.1$  Hz, 2H, triazole<sub>coord</sub>-*CH*<sub>2</sub>-N<sub>amine</sub>), 3.46 (s, 2H, triazole<sub>free</sub>-*CH*<sub>2</sub>-N<sub>amine</sub>). MS (+ESI): *m/z*

= 977.2484 [Ru + L<sup>4</sup> + bpy + CD<sub>3</sub>CN + PF<sub>6</sub>]<sup>+</sup>. UV/Vis (CH<sub>3</sub>CN): λ [nm] (ε [M<sup>-1</sup> cm<sup>-1</sup>]) = 243 (10702), 252 (9868), 286 (30088), 316 (11513), 427 (4653).

**[Ru(L<sup>4</sup>)(L<sup>7</sup>)(CD<sub>3</sub>CN)](PF<sub>6</sub>)<sub>2</sub> {[5(CD<sub>3</sub>CN)](PF<sub>6</sub>)<sub>2</sub>}: A solution of **5**(PF<sub>6</sub>)<sub>2</sub> in CD<sub>3</sub>CN (0.7 mL, 5 mmol/L) was put in an NMR tube and irradiated at 369 nm. The reaction was monitored by <sup>1</sup>H NMR, and after 13 h a maximum amount of 68% of the original complex had reacted to a new species, the <sup>1</sup>H NMR resonances of which could be attributed to [5(CD<sub>3</sub>CN)]<sup>2+</sup> (see Discussion of the NMR results). <sup>1</sup>H NMR (400 MHz, acetonitrile-d<sub>3</sub>): δ = 9.97 (d, *J* = 5.7 Hz, 1H, *py*-triazole), 8.57 (s, 1H, *py*-triazole), 8.03 (dd, *J* = 8.1, 7.7 Hz, 1H, *py*-triazole), 8.02 (s, 1H, *triazole*), 7.98 (d, *J* = 8.1 Hz, 1H, *py*-triazole), 7.84 (s, 1H, *triazole*), 7.59 (dd, *J* = 7.4, 5.8 Hz, *py*-triazole), 7.57 (s, 1H, *triazole*), 7.44–7.20 (m, 18H, *Ph*-CH<sub>2</sub>-triazole), 6.91–6.85 (m, 2H, *Ph*-CH<sub>2</sub>-triazole), 5.67 (d, *J* = 15.0 Hz, 1H, *Ph*-CH<sub>2</sub>-triazole), 5.66 (s, 2H, *Ph*-CH<sub>2</sub>-triazole), 5.63 (s, 2H, *Ph*-CH<sub>2</sub>-triazole), 5.61 (d, *J* = 15.0 Hz, 1H, *triazole*-CH<sub>2</sub>-N<sub>amine</sub>), 5.31 (d, *J* = 14.8 Hz, 1H, *triazole*-CH<sub>2</sub>-N<sub>amine</sub>), 5.16 (s, 2H, *Ph*-CH<sub>2</sub>-triazole), 4.79 (d, *J* = 14.8 Hz, 1H, *triazole*-CH<sub>2</sub>-N<sub>amine</sub>), 4.66 (d, *J* = 15.6 Hz, 1H, *triazole*-CH<sub>2</sub>-N<sub>amine</sub>), 4.56 (d, *J* = 15.8 Hz, 1H, *triazole*-CH<sub>2</sub>-N<sub>amine</sub>), 3.80 (d, *J* = 16.0 Hz, 1H, *triazole*-CH<sub>2</sub>-N<sub>amine</sub>), 3.76 (d, *J* = 16.4 Hz, 1H, *triazole*-CH<sub>2</sub>-N<sub>amine</sub>) ppm.**

**[Ru(L<sup>4</sup>)(L<sup>8</sup>)(CD<sub>3</sub>CN)](PF<sub>6</sub>)<sub>2</sub> {[6(CD<sub>3</sub>CN)](PF<sub>6</sub>)<sub>2</sub>}: A solution of **6**(PF<sub>6</sub>)<sub>2</sub> in CD<sub>3</sub>CN (0.7 mL, 5 mmol/L) was put in an NMR tube and irradiated at 369 nm. The reaction was monitored by <sup>1</sup>H NMR, and after 10 h a maximum amount of 92% of the original complex had reacted to two new species, the <sup>1</sup>H NMR resonances of which could be attributed to [6a(CD<sub>3</sub>CN)]<sup>2+</sup> and [6b(CD<sub>3</sub>CN)]<sup>2+</sup> (see Discussion of the NMR results). Complex [6a(CD<sub>3</sub>CN)]<sup>2+</sup>: <sup>1</sup>H NMR (400 MHz, acetonitrile-d<sub>3</sub>) δ = 8.37 (s, 1H, *triazole*), 8.28 (s, 1H, *triazole*), 8.01 (s, 1H, *triazole*), 7.80 (s, 1H, *triazole*), 7.58 (s, 1H, *triazole*), 7.45–7.19 (m, 23H, *Ph*-CH<sub>2</sub>-triazole), 6.93–6.86 (m, 2H, *Ph*-CH<sub>2</sub>-triazole), 5.81 (d, *J* = 15.2 Hz, 1H, *Ph*-CH<sub>2</sub>-triazole), 5.76 (d, *J* = 15.2 Hz, 1H, *Ph*-CH<sub>2</sub>-triazole), 5.64 (s, 2H, *Ph*-CH<sub>2</sub>-triazole), 5.62 (s, 2H, *Ph*-CH<sub>2</sub>-triazole), 5.57 (s, 2H, *Ph*-CH<sub>2</sub>-triazole), 5.28 (d, *J* = 15.0 Hz, 1H, *triazole*-CH<sub>2</sub>-N<sub>amine</sub>), 5.20 (d, *J* = 15.0 Hz, 1H, *Ph*-CH<sub>2</sub>-triazole), 5.15 (d, *J* = 15.0 Hz, 1H, *Ph*-CH<sub>2</sub>-triazole), 4.78 (d, *J* = 14.7 Hz, 1H, *triazole*-CH<sub>2</sub>-N<sub>amine</sub>), 4.66 (d, *J* = 15.8 Hz, 1H, *triazole*-CH<sub>2</sub>-N<sub>amine</sub>), 4.59 (d, *J* = 16.1 Hz, 1H, *triazole*-CH<sub>2</sub>-N<sub>amine</sub>), 3.80 (d, *J* = 16.2 Hz, 1H, *triazole*-CH<sub>2</sub>-N<sub>amine</sub>), 3.75 (d, *J* = 16.2 Hz, 1H, *triazole*-CH<sub>2</sub>-N<sub>amine</sub>) ppm.**

Complex [6b(CD<sub>3</sub>CN)]<sup>2+</sup>: <sup>1</sup>H NMR (400 MHz, acetonitrile-d<sub>3</sub>) δ = 8.33 (s, 2H, *triazole*-triazole), 7.86 (s, 2H, *triazole*<sub>coord</sub>-CH<sub>2</sub>-N<sub>amine</sub>), 7.57 (s, 1H, *triazole*<sub>free</sub>-CH<sub>2</sub>-N<sub>amine</sub>), 7.46–7.18 (m, 25H, *Ph*-CH<sub>2</sub>-triazole), 5.66–5.55 (m, 4H, *Ph*-CH<sub>2</sub>-tri-tri-CH<sub>2</sub>-Ph), 5.59 (s, 4H, *Ph*-CH<sub>2</sub>-triazole<sub>coord</sub>), 5.49 (s, 2H, *Ph*-CH<sub>2</sub>-triazole<sub>free</sub>), 4.04 (d, *J* = 15.7 Hz, 2H, *triazole*<sub>coord</sub>-CH<sub>2</sub>-N<sub>amine</sub>), 3.61 (d, *J* = 15.8 Hz, 2H, *triazole*<sub>coord</sub>-CH<sub>2</sub>-N<sub>amine</sub>), 3.10 (s, 2H, *triazole*<sub>free</sub>-CH<sub>2</sub>-N<sub>amine</sub>) ppm.

**[Ru(L<sup>5</sup>)(bpy)(CD<sub>3</sub>CN)](PF<sub>6</sub>)<sub>2</sub> {[8(CD<sub>3</sub>CN)](PF<sub>6</sub>)<sub>2</sub>}: A solution of **8a**(PF<sub>6</sub>)<sub>2</sub>/**8b**(PF<sub>6</sub>)<sub>2</sub> (28:72) in CD<sub>3</sub>CN (0.7 mL, 5 mmol/L) was put in an NMR tube and irradiated at 369 nm. The reaction was monitored by <sup>1</sup>H NMR, and after 2 h all of the original complex molecules had reacted to two new species, the <sup>1</sup>H NMR resonances of which could be attributed to [8a(CD<sub>3</sub>CN)]<sup>2+</sup>/[8b(CD<sub>3</sub>CN)]<sup>2+</sup> (80:20) (see Discussion of the NMR results). <sup>1</sup>H NMR (700 MHz, acetonitrile-d<sub>3</sub>) δ = 8.59 (d, *J* = 8.2 Hz, 2H, **a/b**, bpy), 8.41 (s, 0.80H, **a**, *Ph*-triazole, coordinated), 8.38 (s, 1.20H, **a/b**, *iPr*-*Ph*-triazole, coordinated), 8.38–8.36 (m, 2H, **a/b**, bpy), 8.26 (s, 0.20H, **b**, *Ph*-triazole, de-coordinated), 8.22 (s, 0.80H, **a**, *iPr*-*Ph*-triazole, de-coordinated), 8.20–8.17 (m, 2H, **a/b**, bpy), 7.90–7.87, 7.81–7.77, 7.70–7.58, 7.54–7.51, 7.50–7.47 (5 multiplets, 15H, **a/b**, bpy, *Ph*-triazole, *iPr*-*Ph*-triazole), 4.43 (d, *J* = 16.3 Hz, 1.20H, **a/b**, *iPr*-*Ph*-triazole-CH<sub>2</sub>, coordinated), 4.42 (d, *J* = 16.3 Hz, 0.80H, **a**, *Ph*-triazole-CH<sub>2</sub>, coordinated), 3.99 (d, *J* = 16.3 Hz, 1.20H, **a/b**, *iPr*-*Ph*-triazole-CH<sub>2</sub>, coordinated), 3.98 (d, *J* = 16.3 Hz, 0.80H, **a**, *Ph*-triazole-CH<sub>2</sub>, coordinated), 3.44 (s, 0.40H, **b**, *Ph*-triazole-CH<sub>2</sub>, de-coordinated), 3.43 (s, 1.60H, **a**, *iPr*-*Ph*-triazole-CH<sub>2</sub>, de-coordinated), 3.05 (hept, *J* = 6.8 Hz, 2H, **a/b**, *iPr*-*Ph*), 1.31–1.29 (d, *J* = 6.8 Hz, 2.40H, **b**, *iPr*-*Ph*, coordinated; d, *J* = 6.8 Hz, 4.80H, **a**, *iPr*-*Ph*, coordinated; d, *J* = 6.8 Hz, 4.80H, **a**, *iPr*-*Ph*, de-coordinated) ppm.**

$^1\text{H}$  NMR spectra

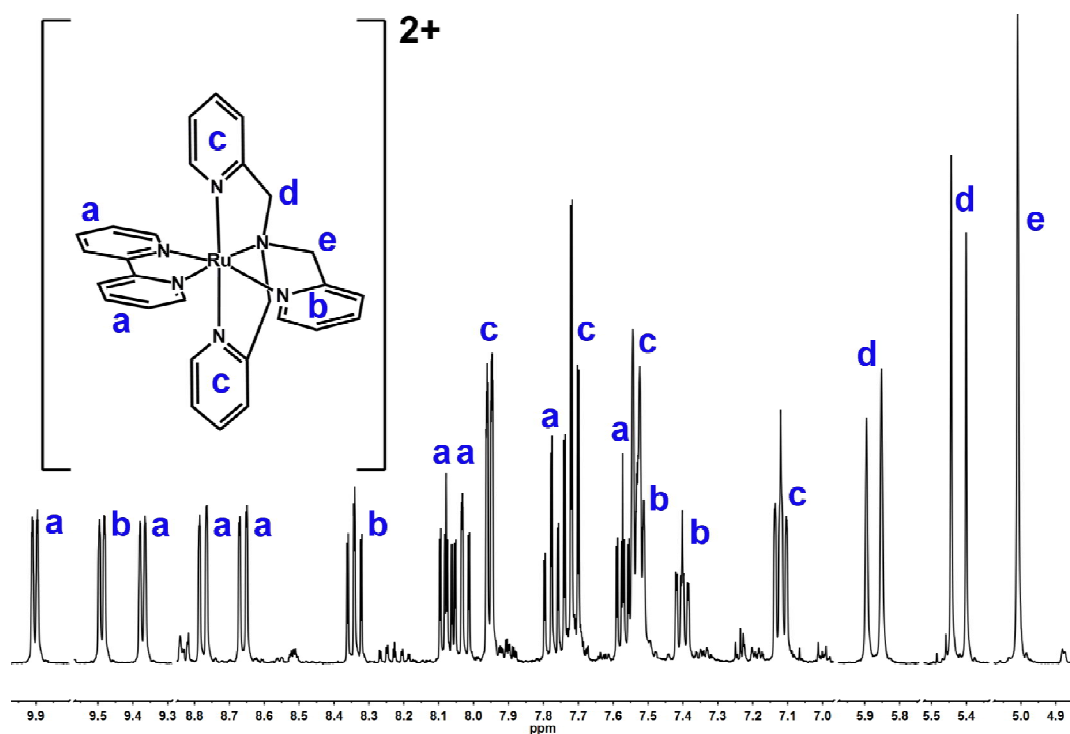

**Figure S1.**  $^1\text{H}$  NMR spectrum of  $1^{2+}$  recorded in acetone- $\text{d}_6$ . Parts of the spectrum are cut for better visibility of the signals.

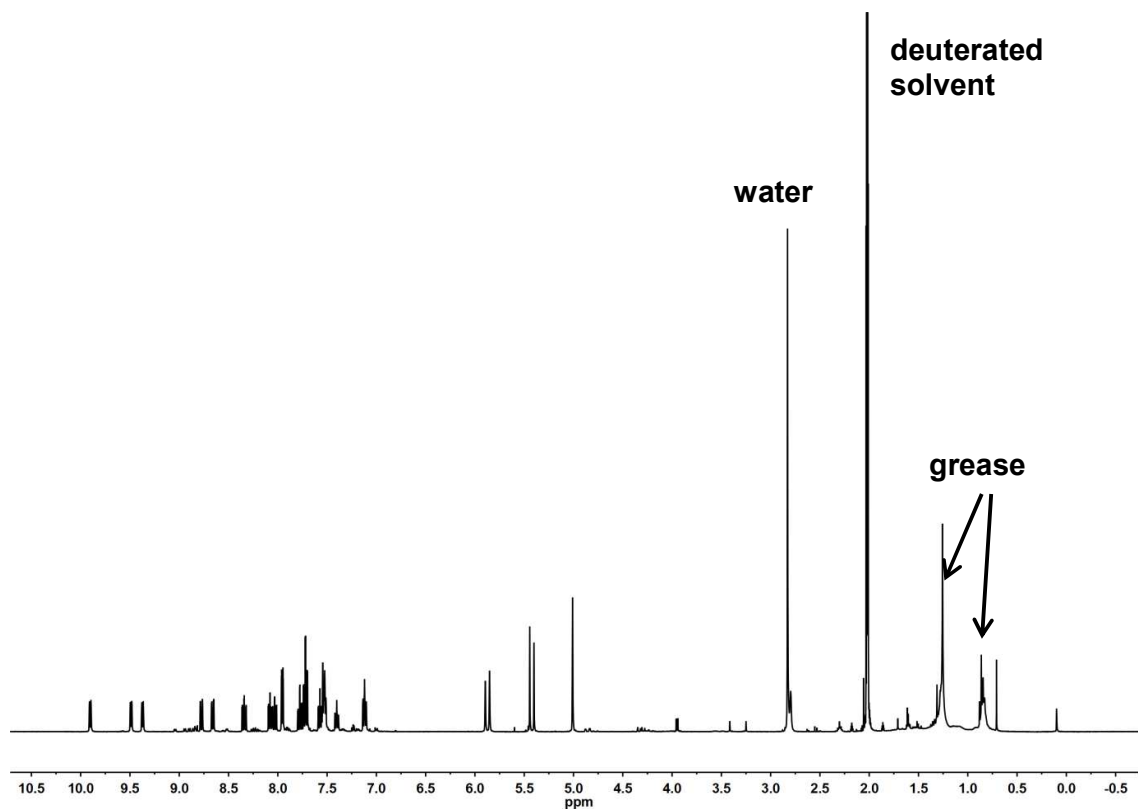

**Figure S2.** Full  $^1\text{H}$  NMR spectrum of  $1^{2+}$  recorded in acetone- $\text{d}_6$ . Solvent impurities are indicated.



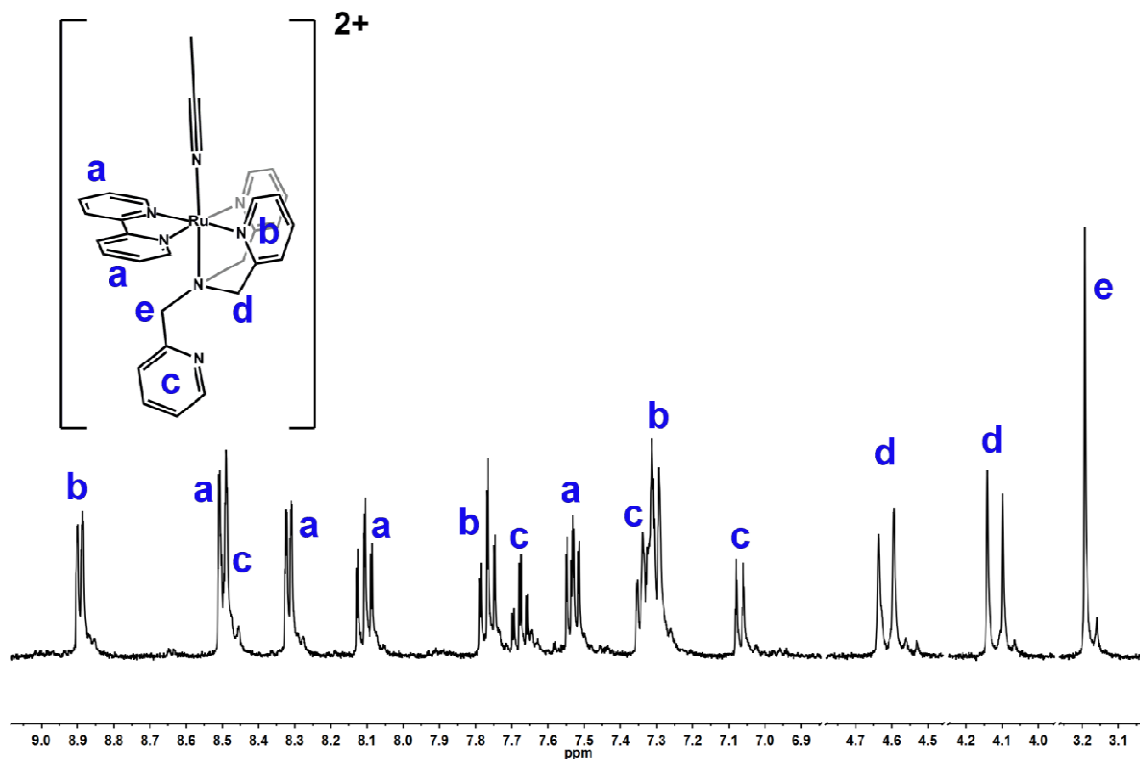

**Figure S3.**  $^1\text{H}$  NMR spectrum of  $[1(\text{CD}_3\text{CN})]^{2+}$  recorded in acetonitrile- $\text{d}_3$ . Parts of the spectrum are cut for better visibility of the signals.

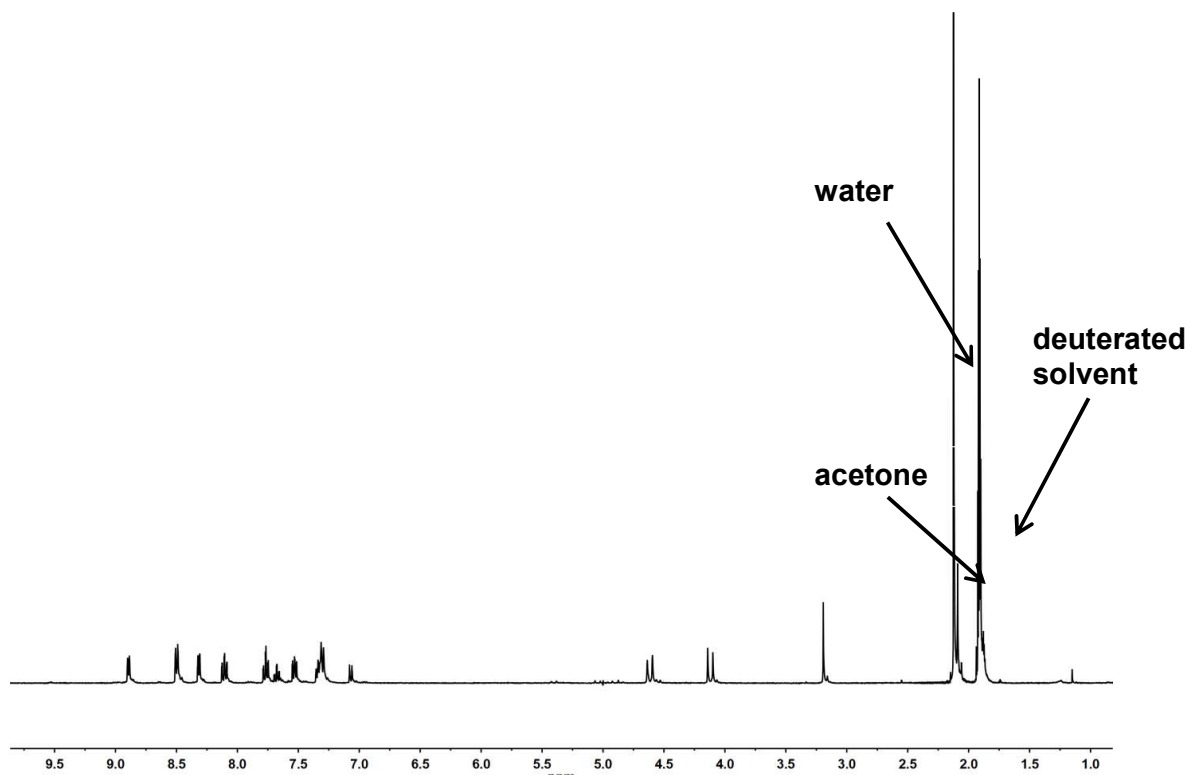

**Figure S4.** Full  $^1\text{H}$  NMR spectrum of  $[1(\text{CD}_3\text{CN})]^{2+}$  recorded in acetonitrile- $\text{d}_3$ . Solvent impurities are indicated.

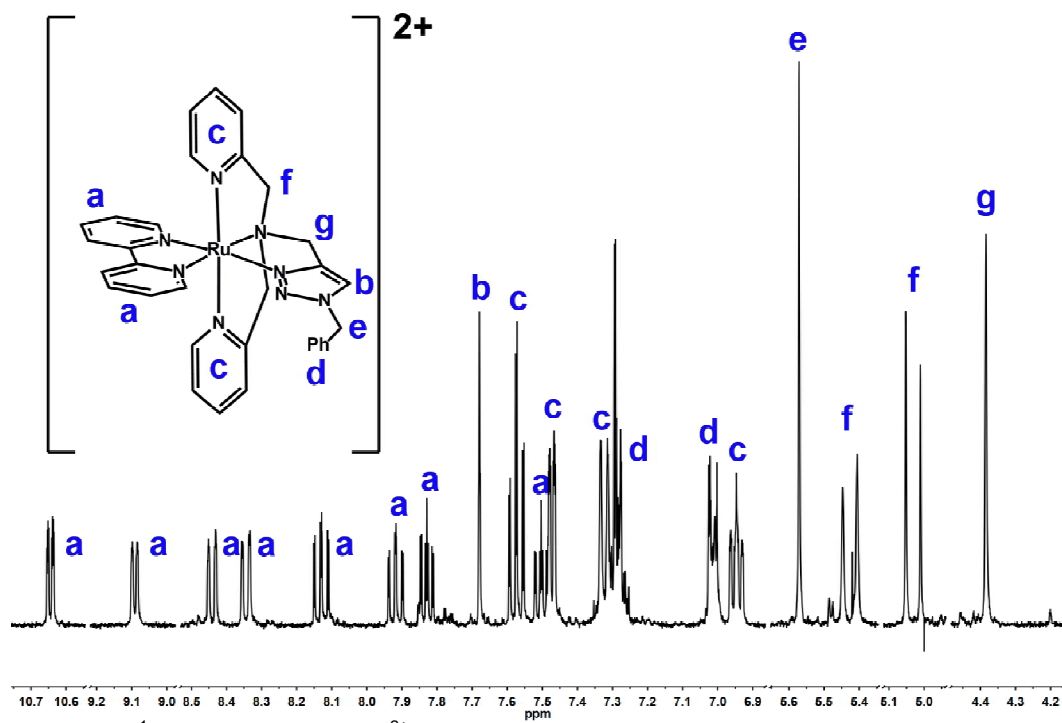

**Figure S5.**  $^1\text{H}$  NMR spectrum of  $2^{2+}$  recorded in acetonitrile- $\text{d}_3$ . Parts of the spectrum are cut for better visibility of the signals.

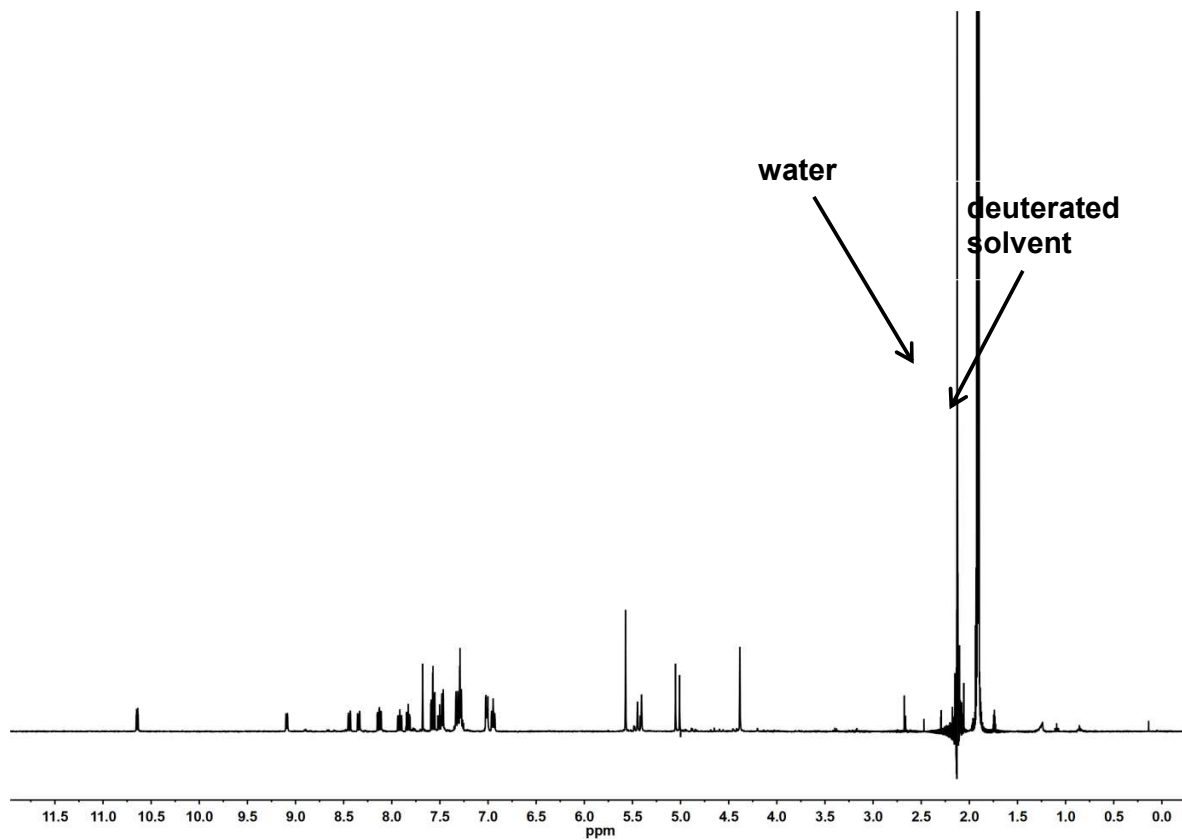

**Figure S6.** Full  $^1\text{H}$  NMR spectrum of  $2^{2+}$  recorded in acetonitrile- $\text{d}_3$ . Solvent impurities are indicated.

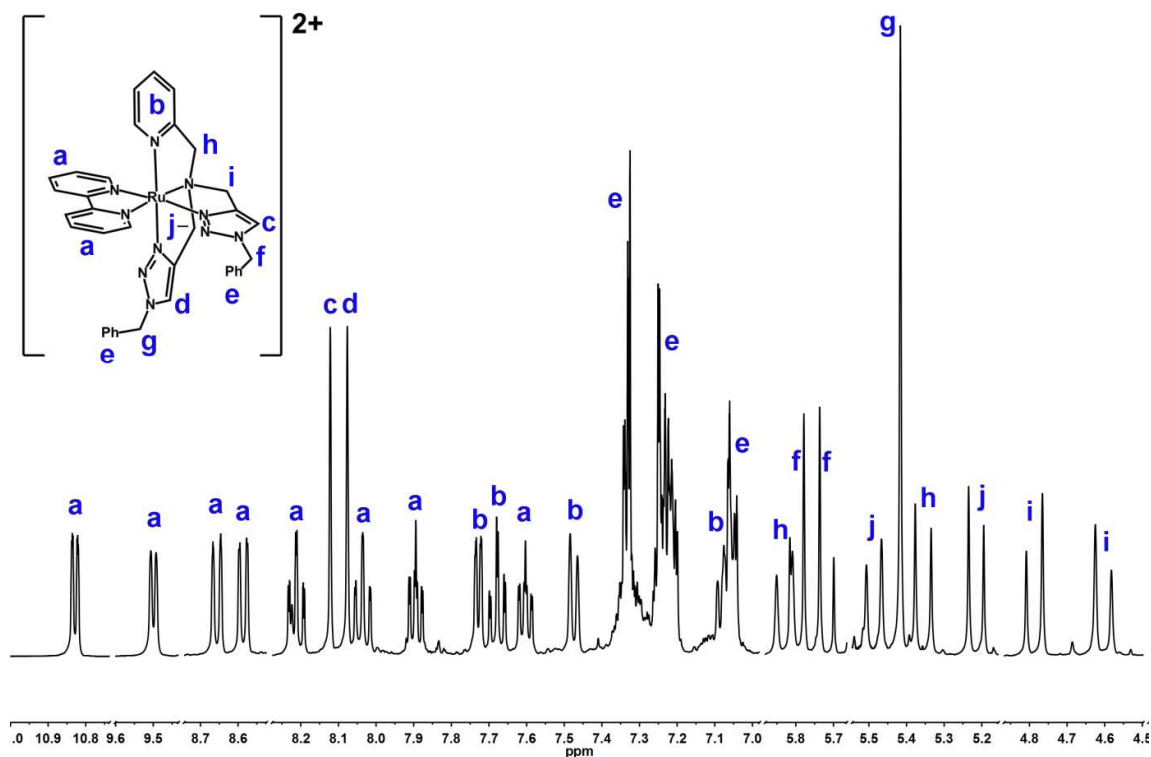

**Figure S7.**  $^1\text{H}$  NMR spectrum of  $3^{2+}$  recorded in acetone- $\text{d}_6$ . Parts of the spectrum are cut for better visibility of the signals.

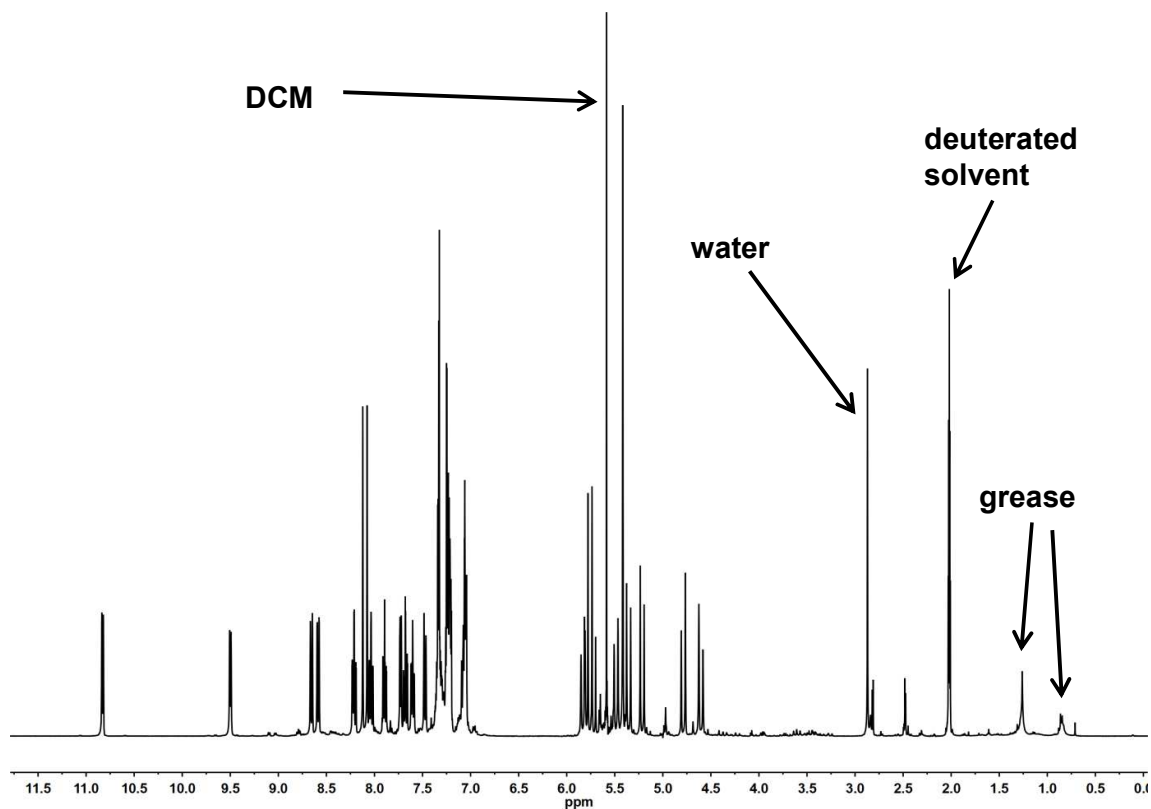

**Figure S8.** Full  $^1\text{H}$  NMR spectrum of  $3^{2+}$  recorded in acetone- $\text{d}_6$ . Solvent impurities are indicated.

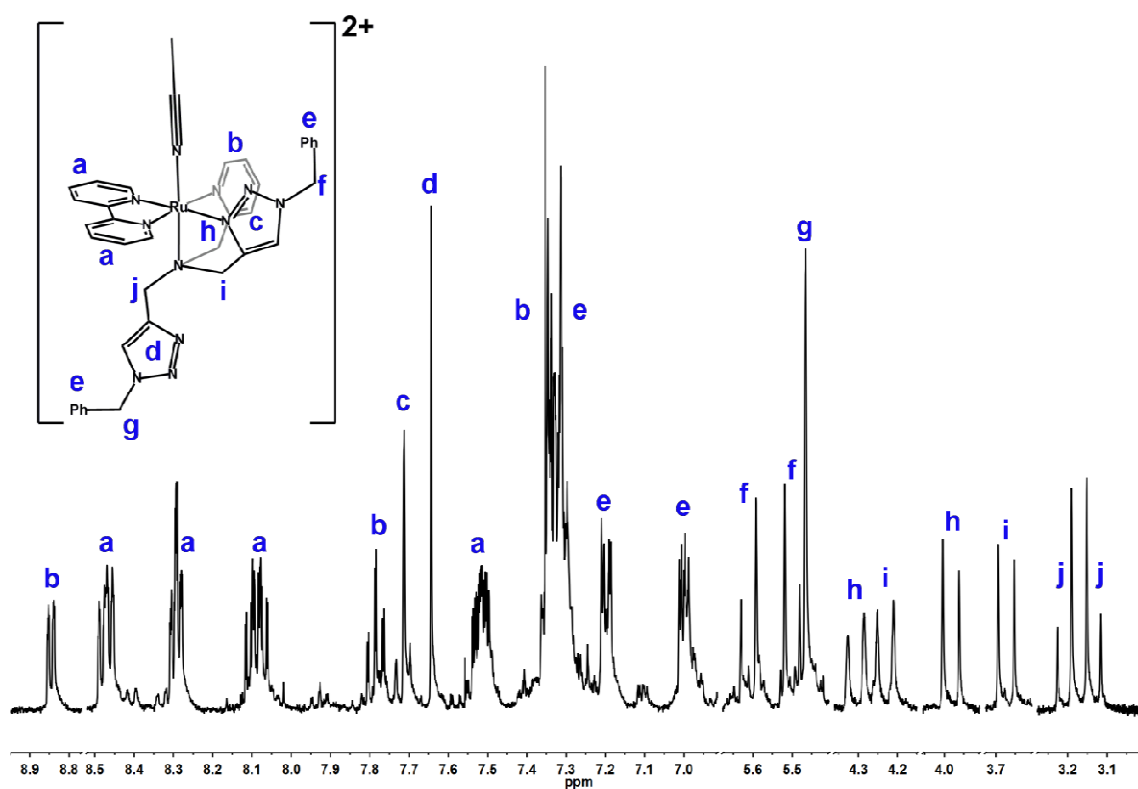

**Figure S9.**  $^1\text{H}$  NMR spectrum of  $[\mathbf{3}(\text{CD}_3\text{CN})]^{2+}$  recorded in acetonitrile- $\text{d}_3$ . Parts of the spectrum are cut for better visibility of the signals.

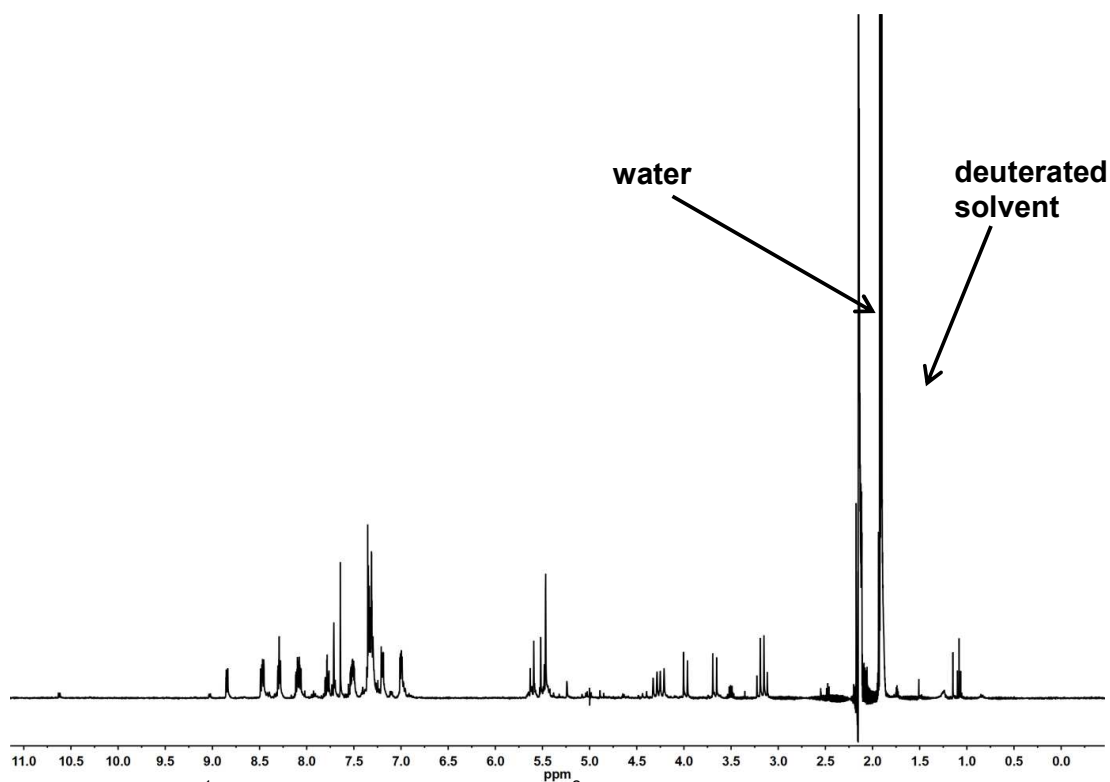

**Figure S10.** Full  $^1\text{H}$  NMR spectrum of  $[\mathbf{3}(\text{CD}_3\text{CN})]^{2+}$  recorded in acetonitrile- $\text{d}_3$ . Solvent impurities are indicated.

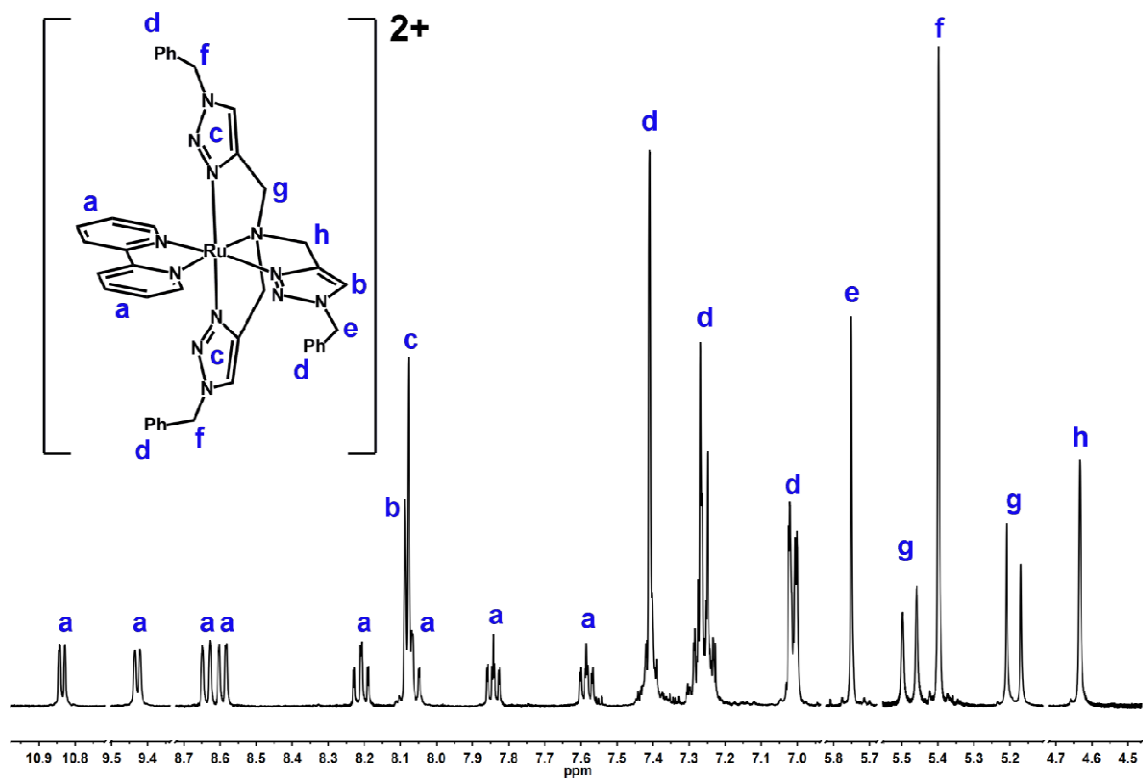

**Figure S11.**  $^1\text{H}$  NMR spectrum of  $4^{2+}$  recorded in acetone- $\text{d}_6$ . Parts of the spectrum are cut for better visibility of the signals.

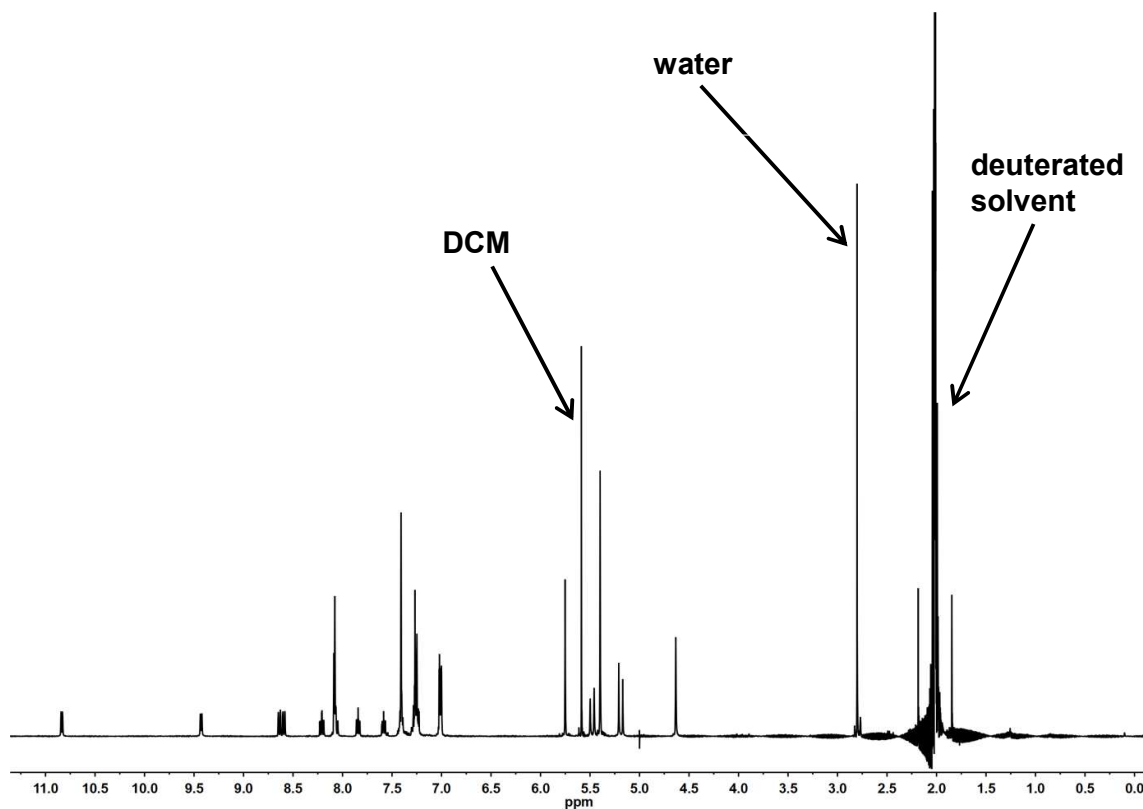

**Figure S12.** Full  $^1\text{H}$  NMR spectrum of  $4^{2+}$  recorded in acetone- $\text{d}_6$ . Solvent impurities are indicated.

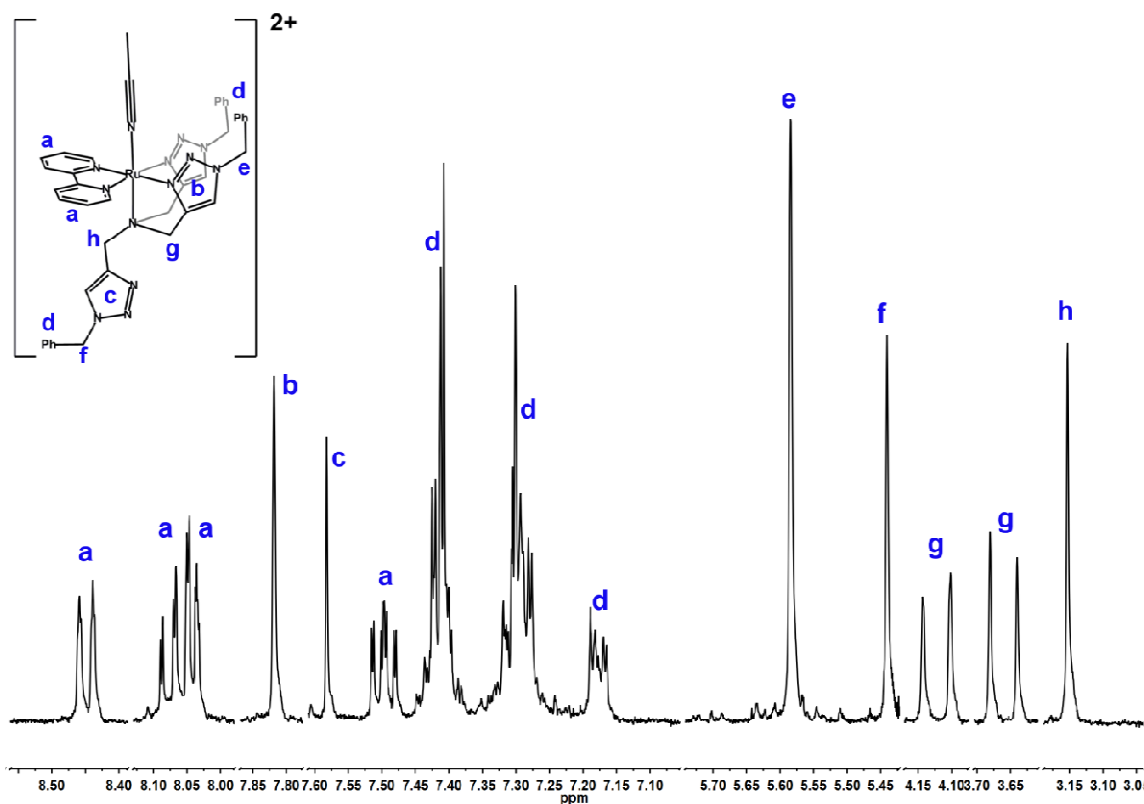

**Figure S13.**  $^1\text{H}$  NMR spectrum of  $[\mathbf{4}(\text{CD}_3\text{CN})]^{2+}$  recorded in acetonitrile- $\text{d}_3$ . Parts of the spectrum are cut for better visibility of the signals.

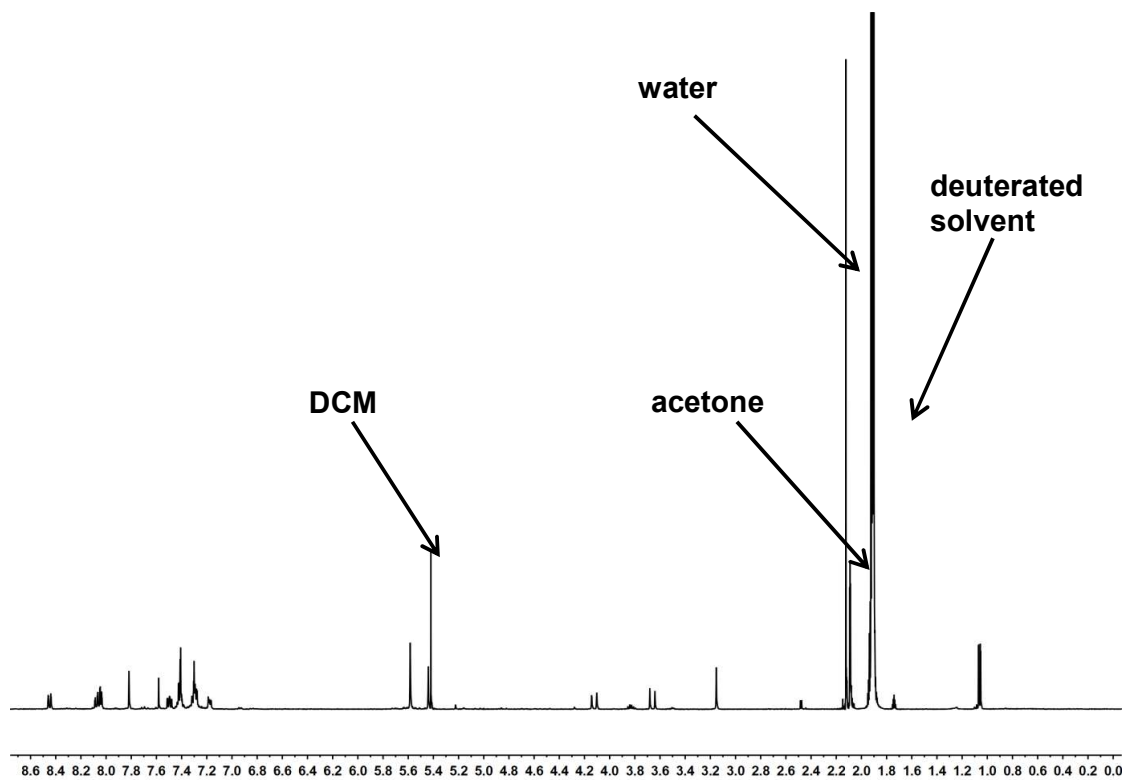

**Figure S14.** Full  $^1\text{H}$  NMR spectrum of  $[\mathbf{4}(\text{CD}_3\text{CN})]^{2+}$  recorded in acetonitrile- $\text{d}_3$ . Solvent impurities are indicated.

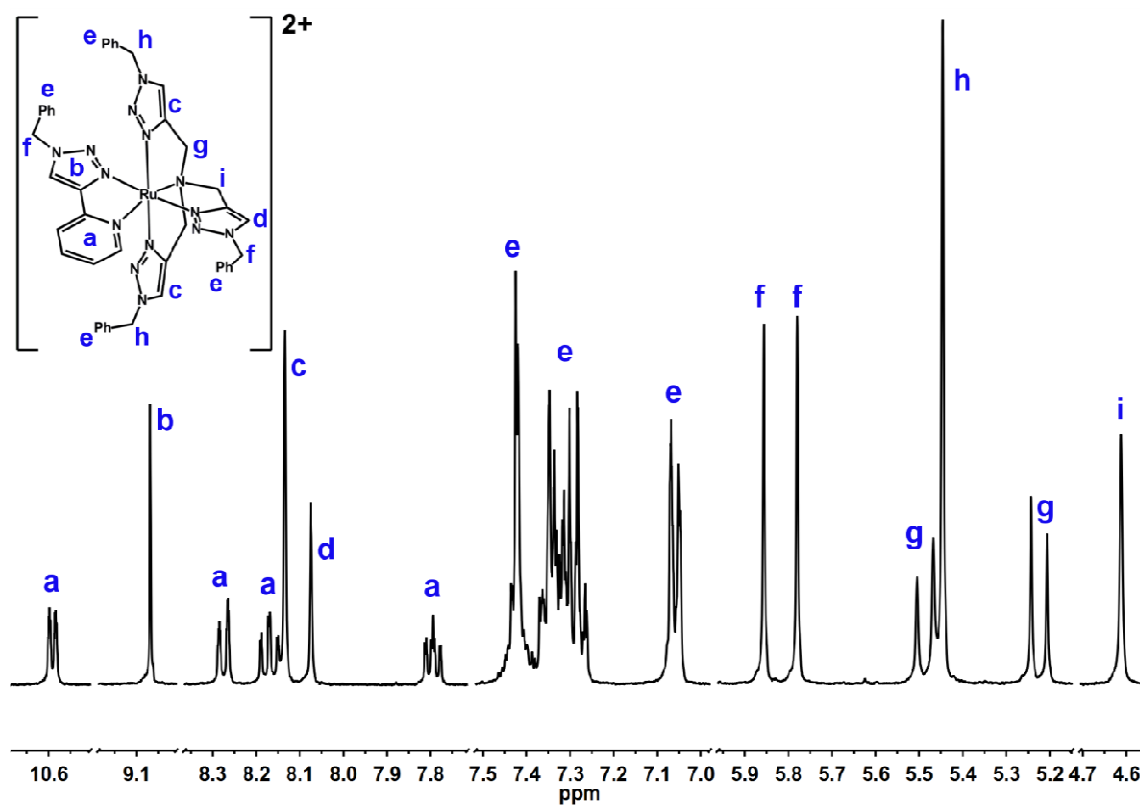

**Figure S15.**  $^1\text{H}$  NMR spectrum of  $5^{2+}$  recorded in acetone- $\text{d}_6$ . Parts of the spectrum are cut for better visibility of the signals.

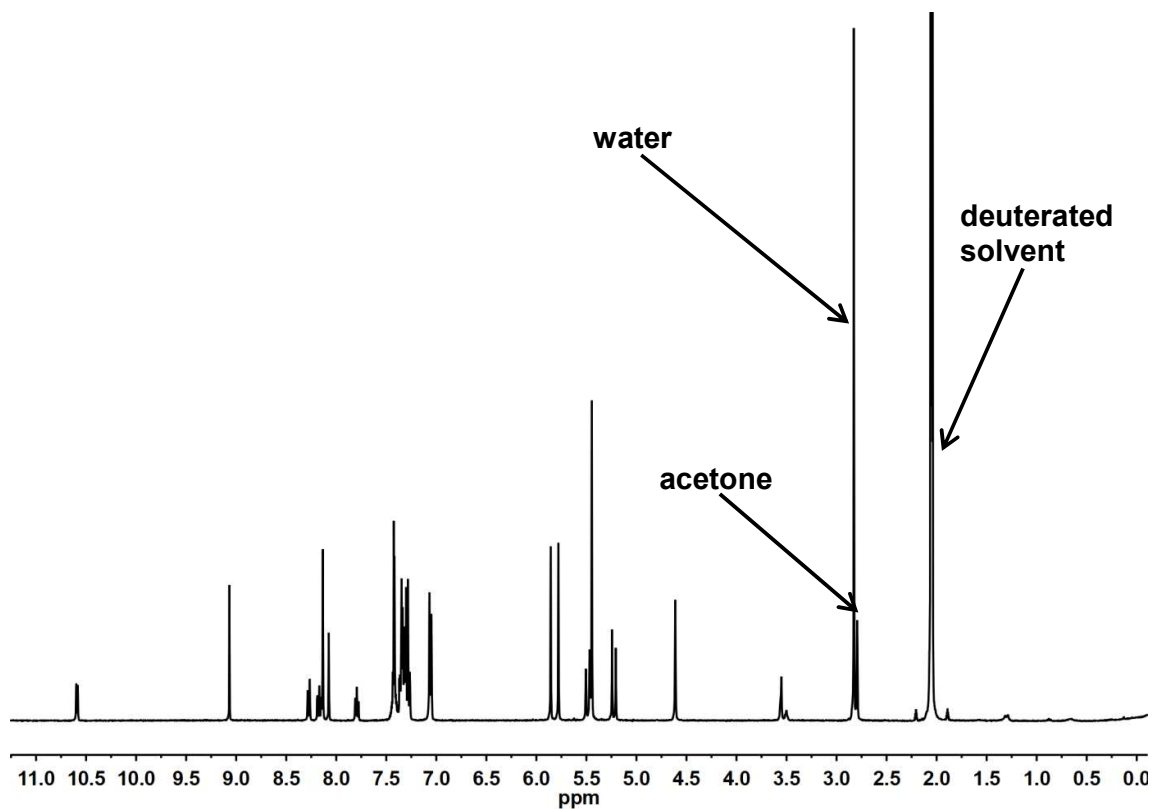

**Figure S16.** Full  $^1\text{H}$  NMR spectrum of  $5^{2+}$  recorded in acetone- $\text{d}_6$ . Solvent impurities are indicated.

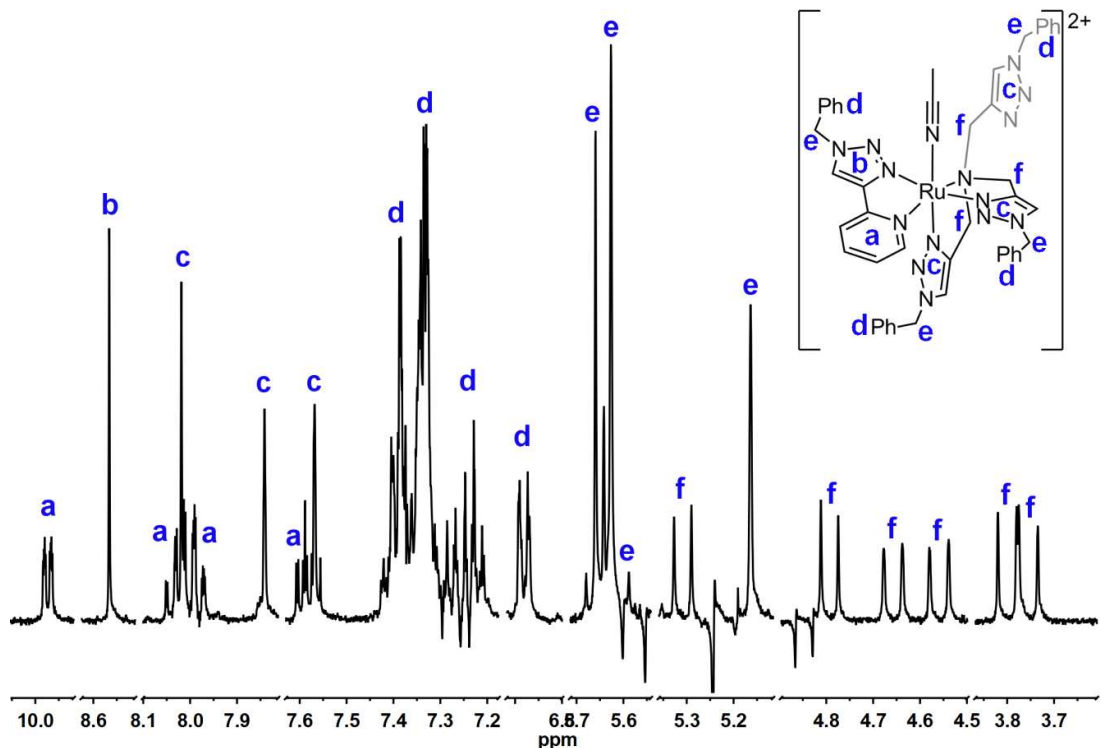

**Figure S17.**  $^1\text{H}$  NMR spectrum of  $[\mathbf{5}(\text{CD}_3\text{CN})]^{2+}$  recorded in acetonitrile- $d_3$ . Parts of the spectrum are cut for better visibility of the signals. The conversion of  $\mathbf{5}^{2+}$  to  $[\mathbf{5}(\text{CD}_3\text{CN})]^{2+}$  was 68%, and the resonances of  $\mathbf{5}^{2+}$  were subtracted to facilitate the assignment of resonances of  $[\mathbf{5}(\text{CD}_3\text{CN})]^{2+}$ .

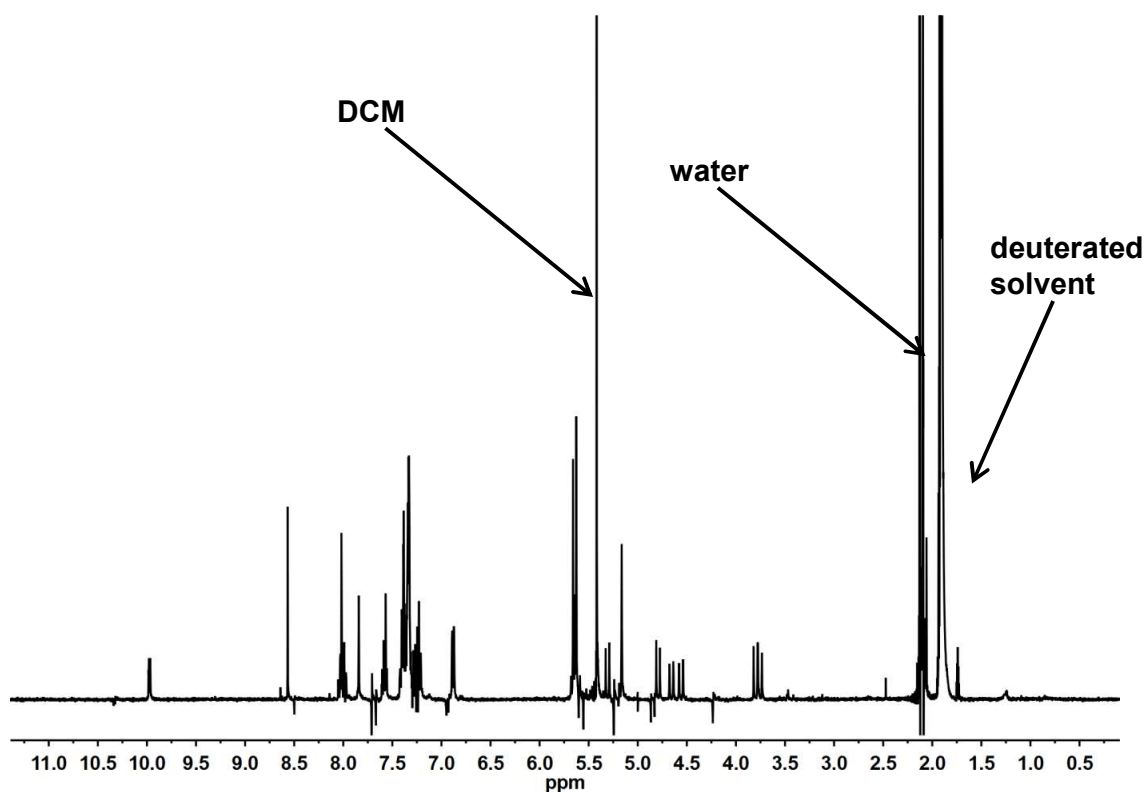

**Figure S18.** Full  $^1\text{H}$  NMR spectrum of  $[\mathbf{5}(\text{CD}_3\text{CN})]^{2+}$  recorded in acetonitrile- $d_3$ . The resonances of remaining  $\mathbf{5}^{2+}$  were subtracted to facilitate the assignment of resonances of  $[\mathbf{5}(\text{CD}_3\text{CN})]^{2+}$ . Solvent impurities are indicated.



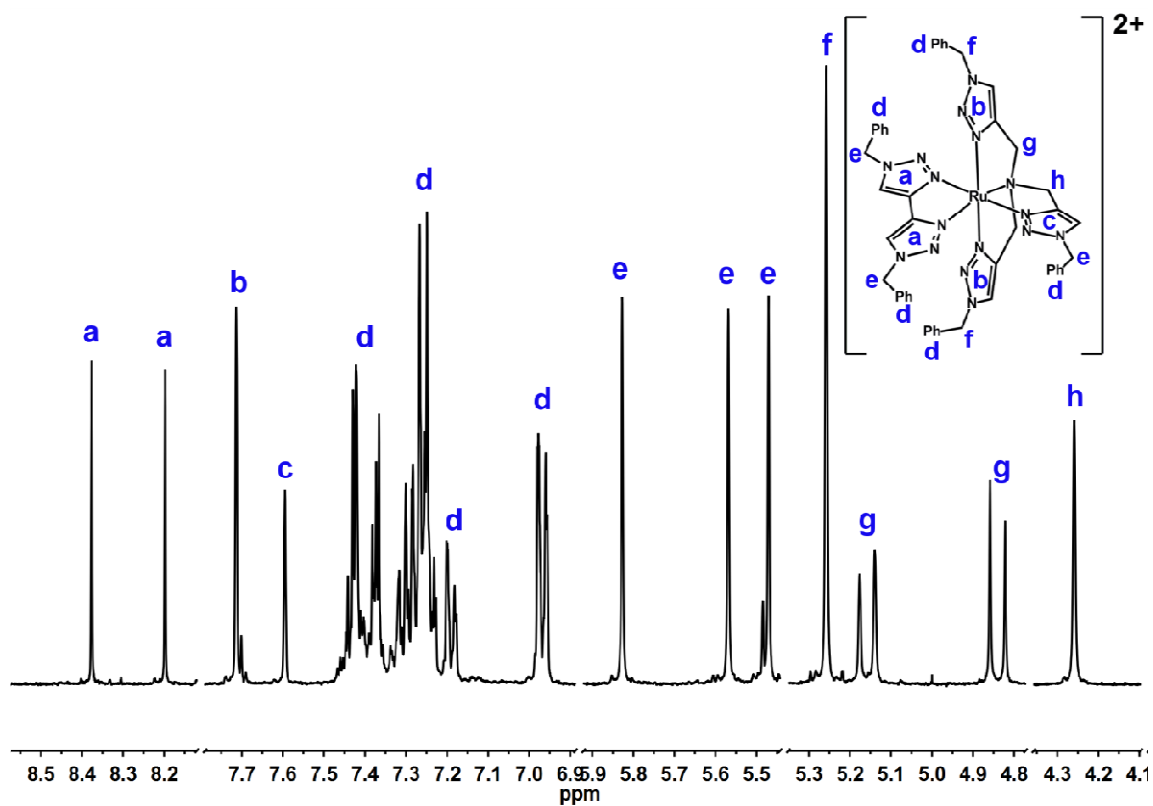

**Figure S19.**  $^1\text{H}$  NMR spectrum of  $6^{2+}$  recorded in acetonitrile- $\text{d}_3$ . Parts of the spectrum are cut for better visibility of the signals.

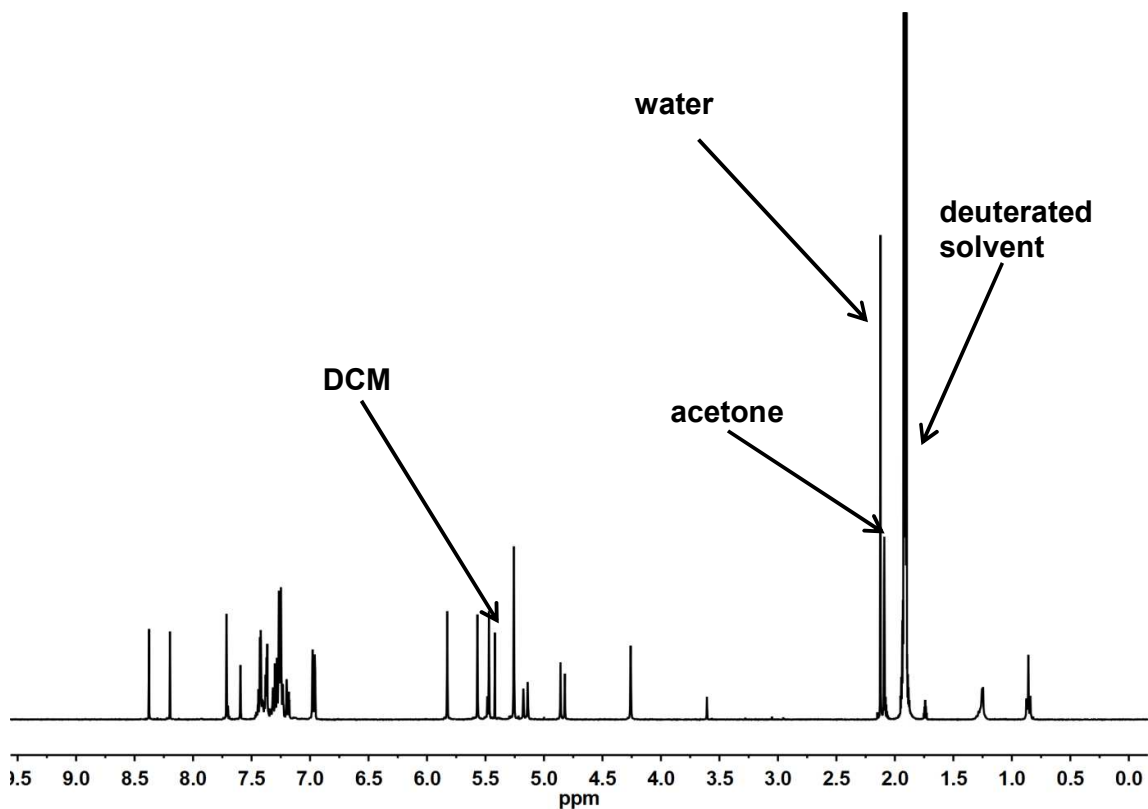

**Figure S20.** Full  $^1\text{H}$  NMR spectrum of  $6^{2+}$  recorded in acetonitrile- $\text{d}_3$ . Solvent impurities are indicated.

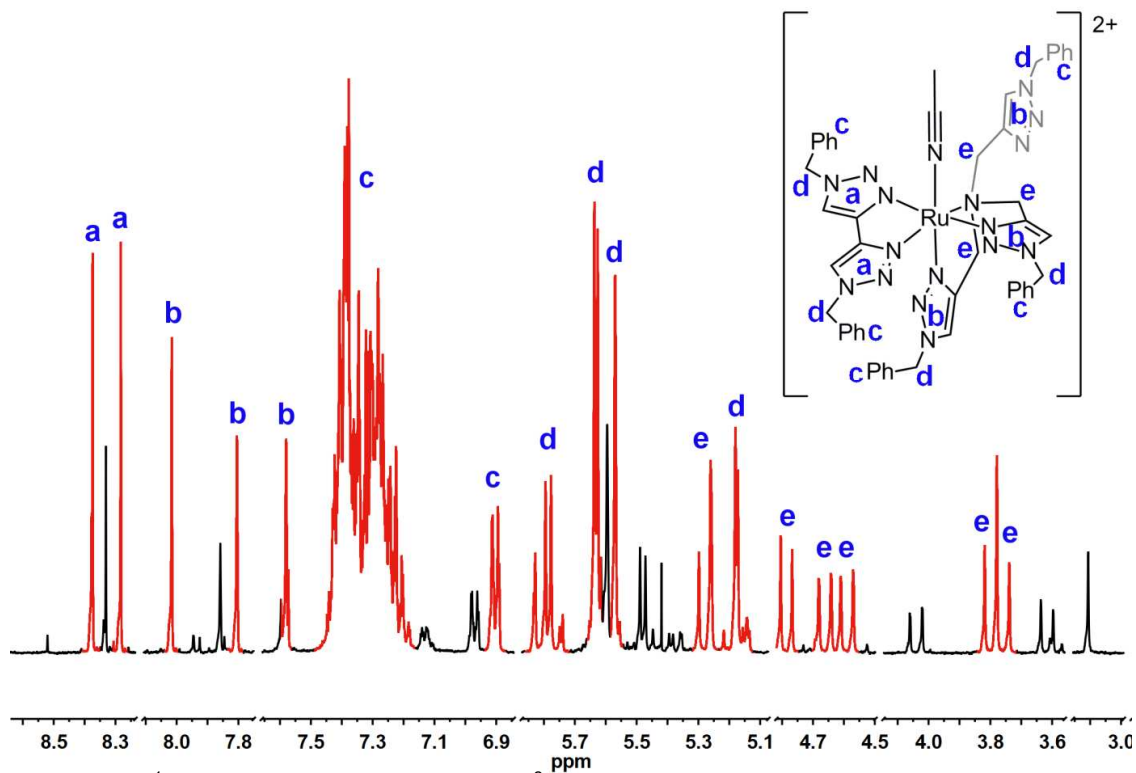

**Figure S21.**  $^1\text{H}$  NMR spectrum of  $[\mathbf{6a}(\text{CD}_3\text{CN})]^{2+}$  (resonances in red) recorded in acetonitrile- $\text{d}_3$ . Parts of the spectrum are cut for better visibility of the signals. The conversion of  $\mathbf{6}^{2+}$  to  $[\mathbf{6a}(\text{CD}_3\text{CN})]^{2+}$  was ca. 74%.

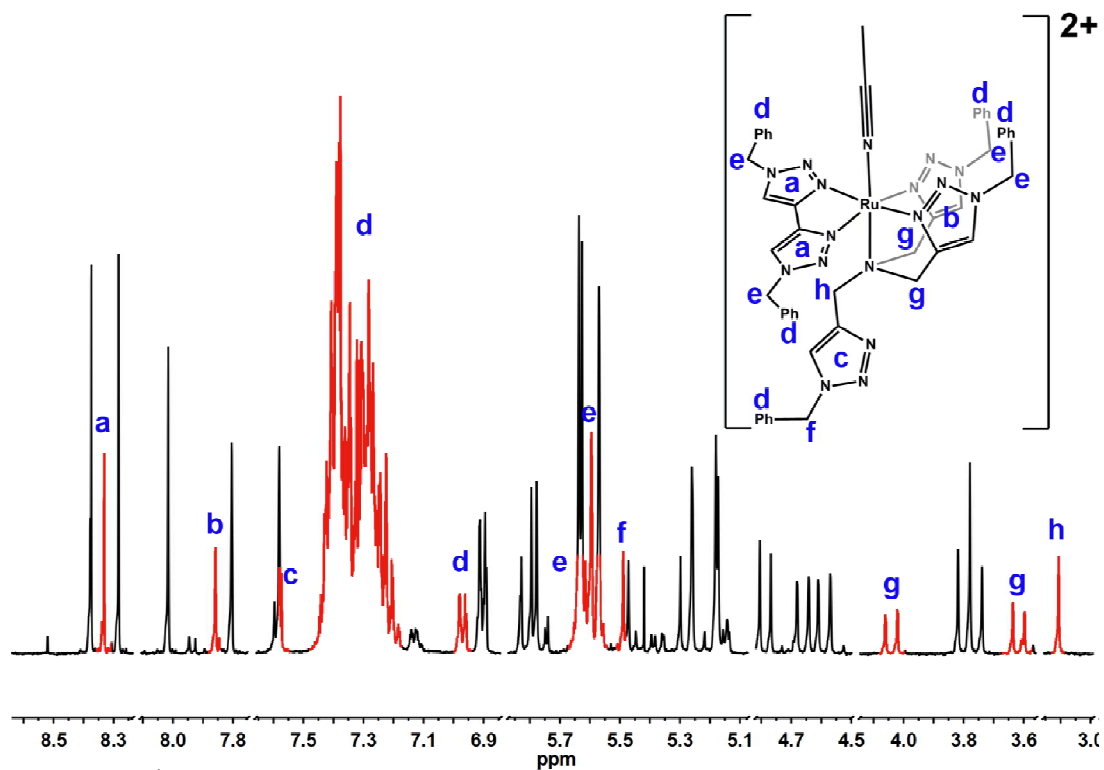

**Figure S22.**  $^1\text{H}$  NMR spectrum of  $[\mathbf{6b}(\text{CD}_3\text{CN})]^{2+}$  (resonances in red) recorded in acetonitrile- $\text{d}_3$ . Parts of the spectrum are cut for better visibility of the signals. The conversion of  $\mathbf{6}^{2+}$  to  $[\mathbf{6b}(\text{CD}_3\text{CN})]^{2+}$  was ca. 8%.

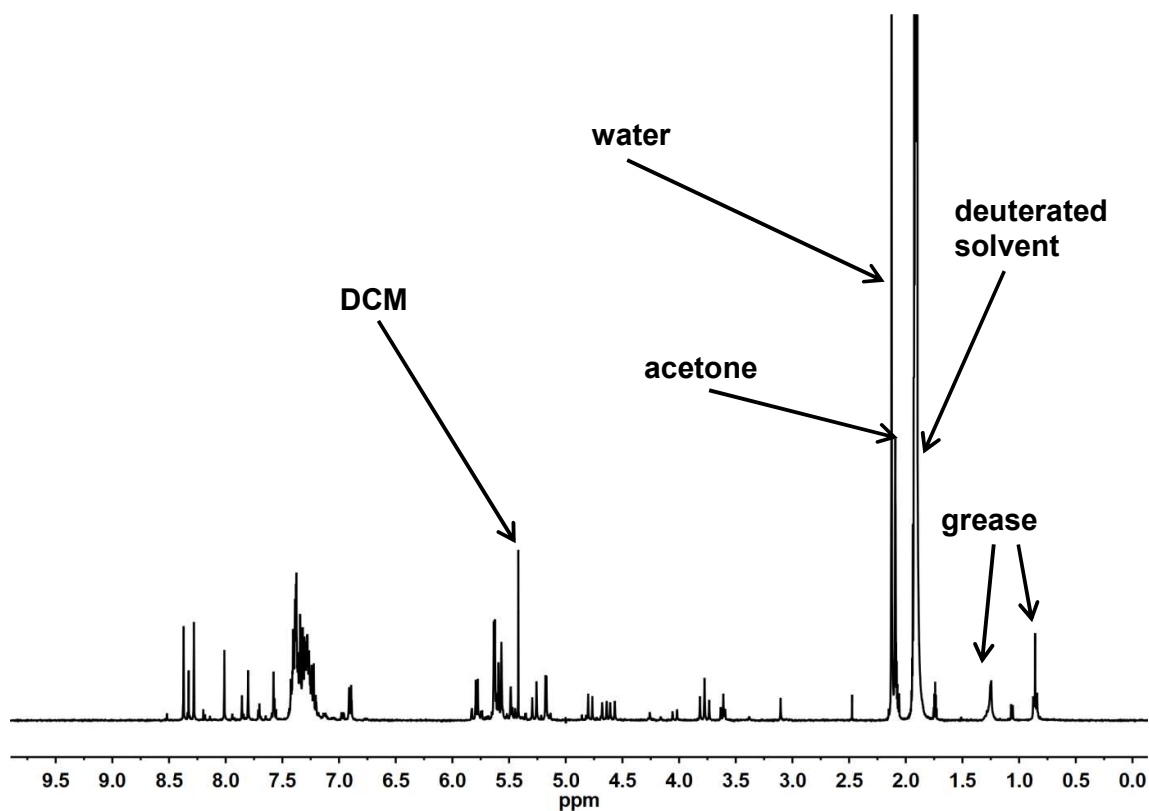

**Figure S23.** Full  $^1\text{H}$  NMR spectrum of  $[\mathbf{6a}(\text{CD}_3\text{CN})]^{2+}$  and  $[\mathbf{6b}(\text{CD}_3\text{CN})]^{2+}$  recorded in acetonitrile- $\text{d}_3$ . Solvent impurities are indicated.

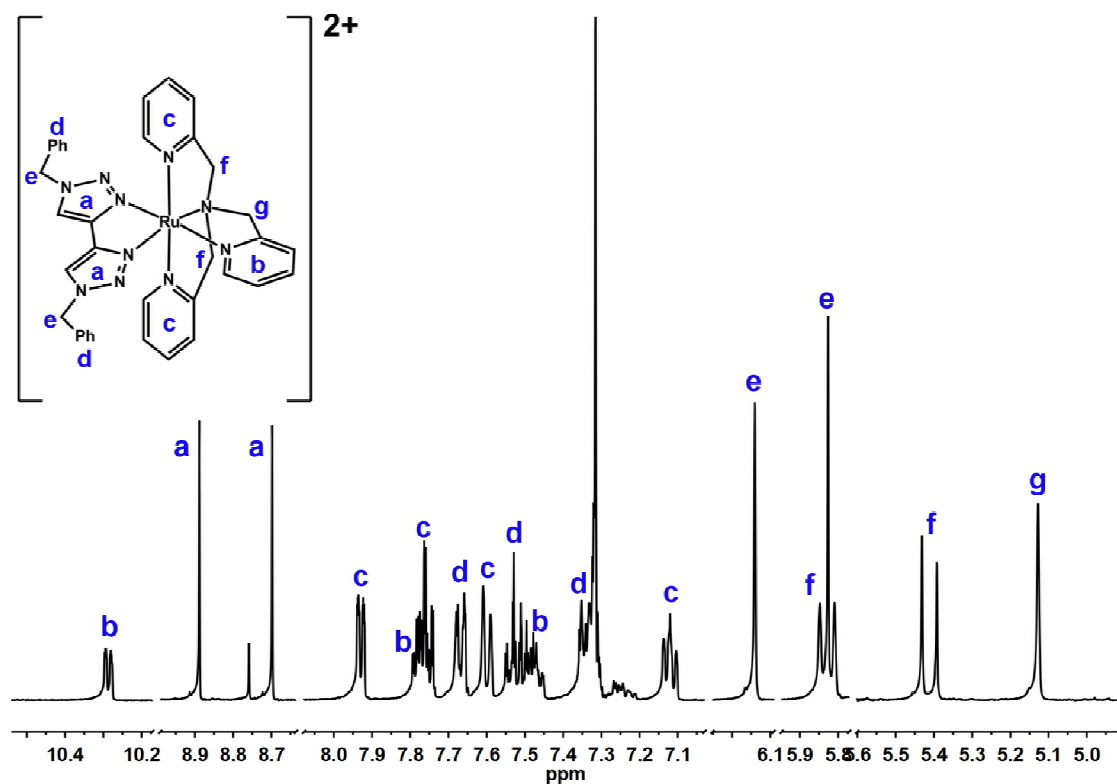

**Figure S24.**  $^1\text{H}$  NMR spectrum of  $\mathbf{7}^{2+}$  recorded in acetone- $\text{d}_6$ . Parts of the spectrum are cut for better visibility of the signals.

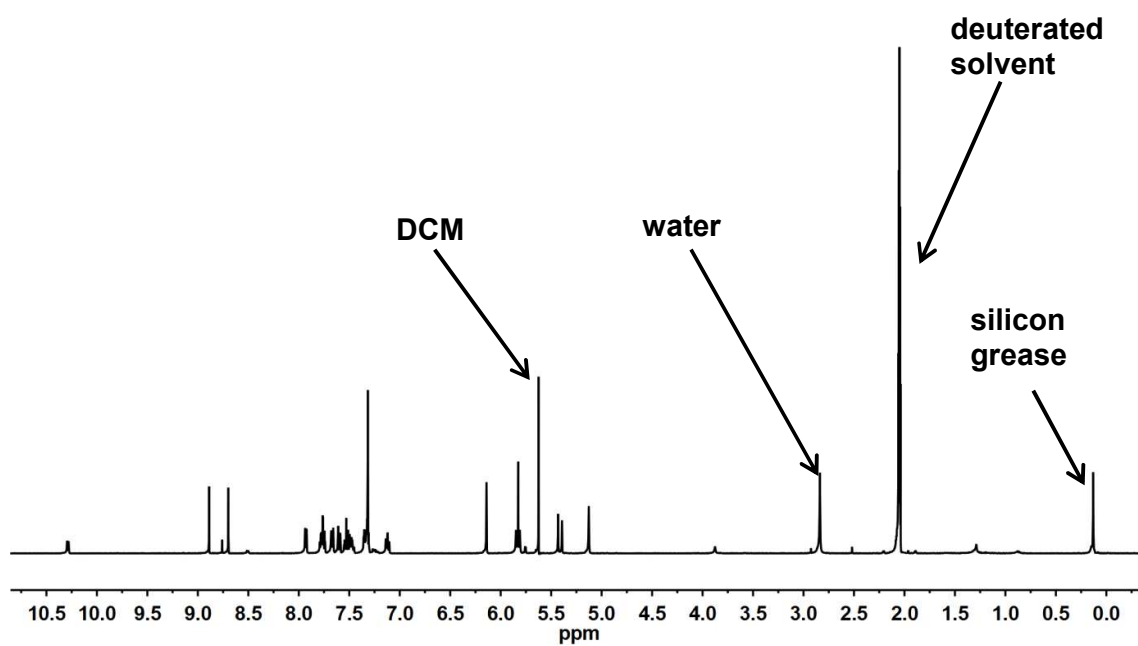

**Figure S25.** Full  $^1\text{H}$  NMR spectrum of  $7^{2+}$  recorded in acetone- $\text{d}_6$ . Solvent impurities are indicated.

## Crystal Structures

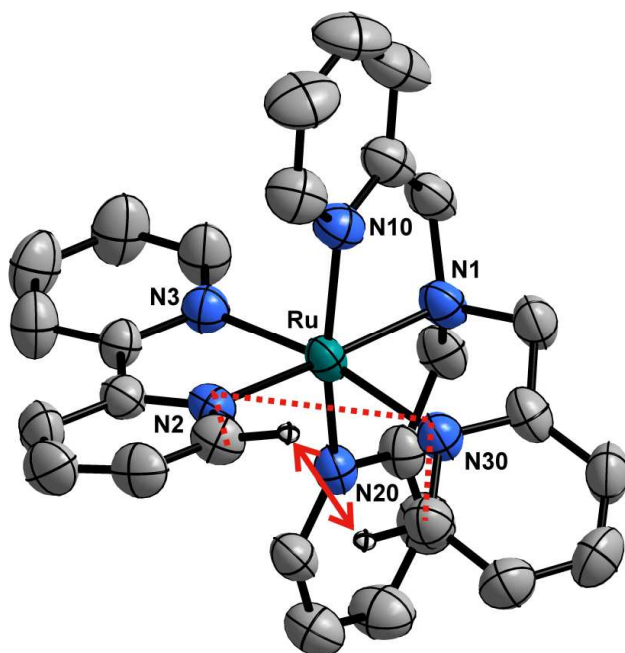

**Figure S26.** Perspective view of  $1^{2+}$ . The thermal ellipsoids are drawn at the 50% probability level. All but 2 H atoms, counterions, and crystal solvent molecules are omitted for clarity. The red dotted line indicates the torsion angle between the two adjacent pyridine rings in the equatorial plane. The double-headed red arrow indicates the steric repulsion between two C-H bonds in the equatorial plane.

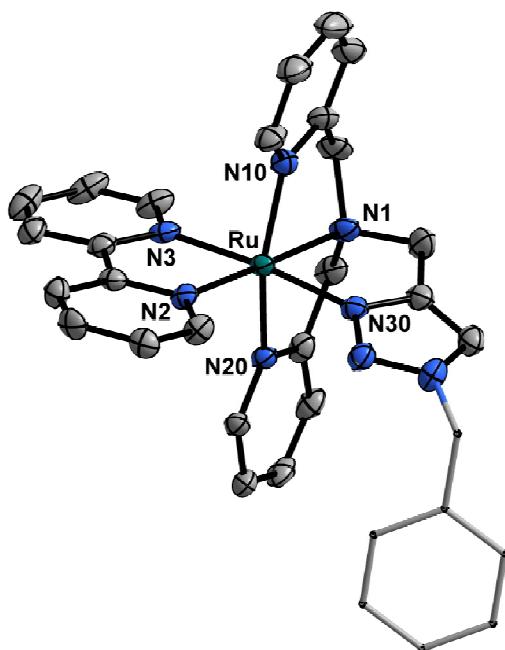

**Figure S27.** Perspective view of  $2^{2+}$ . The thermal ellipsoids are drawn at the 50% probability level, and the benzyl moieties are drawn as stick models. H atoms, counterions, and crystal solvent molecules are omitted for clarity.

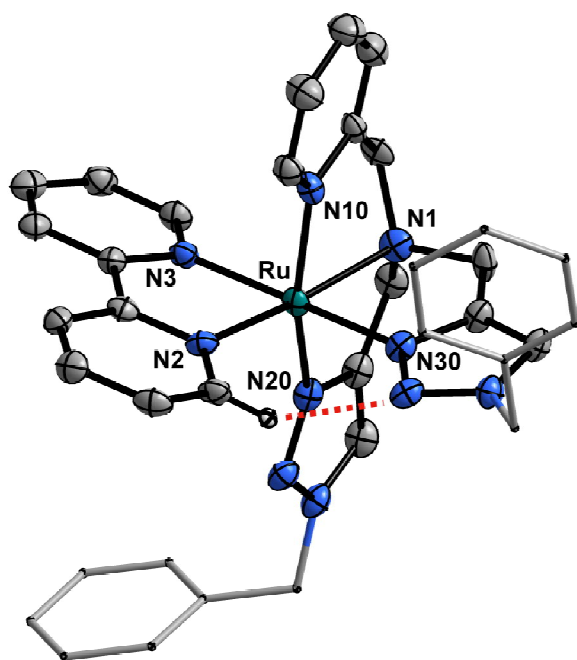

**Figure S28.** Perspective view of  $3^{2+}$ . The thermal ellipsoids are drawn at the 50% probability level, and the benzyl moieties are drawn as stick models. All but 1 H atom, counterions, and crystal solvent molecules are omitted for clarity. The red dotted line indicates a short C–H $\cdots$ N contact.

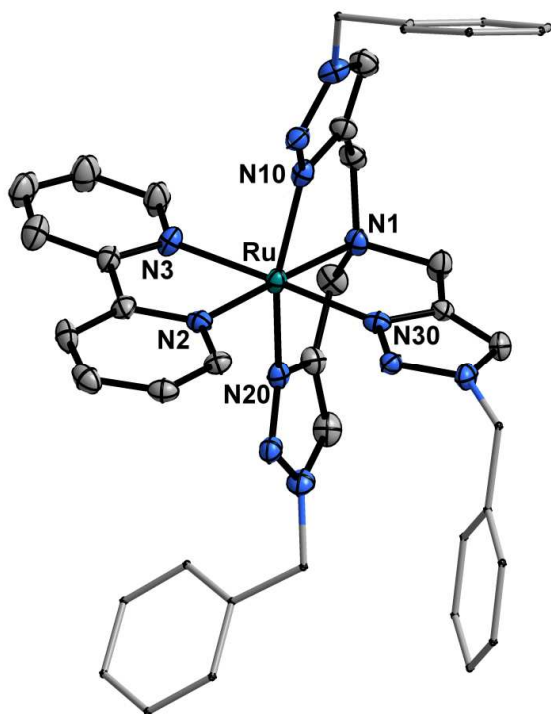

**Figure S29.** Perspective view of  $4^{2+}$ . The thermal ellipsoids are drawn at the 50% probability level, and the benzyl moieties are drawn as stick models. H atoms, counterions, and crystal solvent molecules are omitted for clarity.

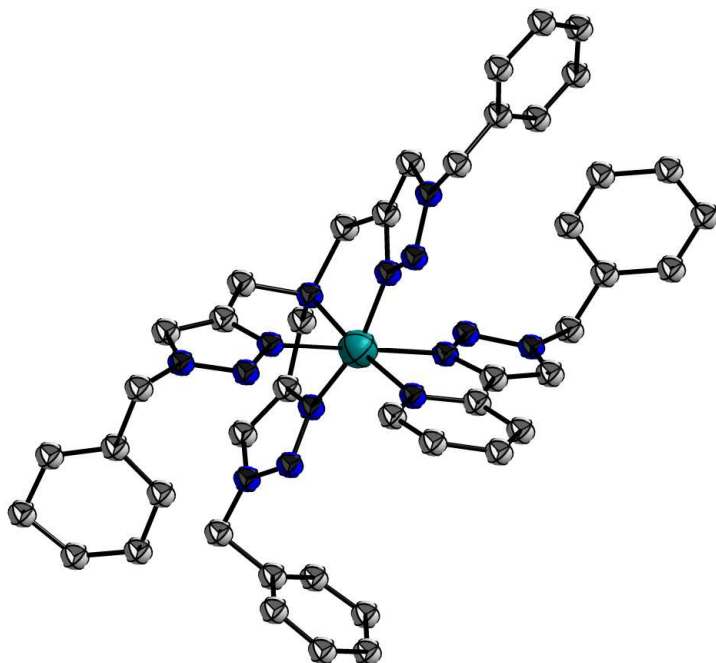

**Figure S30.** Perspective view of  $5^{2+}$  (ball-and-stick model). H atoms, counterions, and crystal solvent molecules are omitted for clarity.

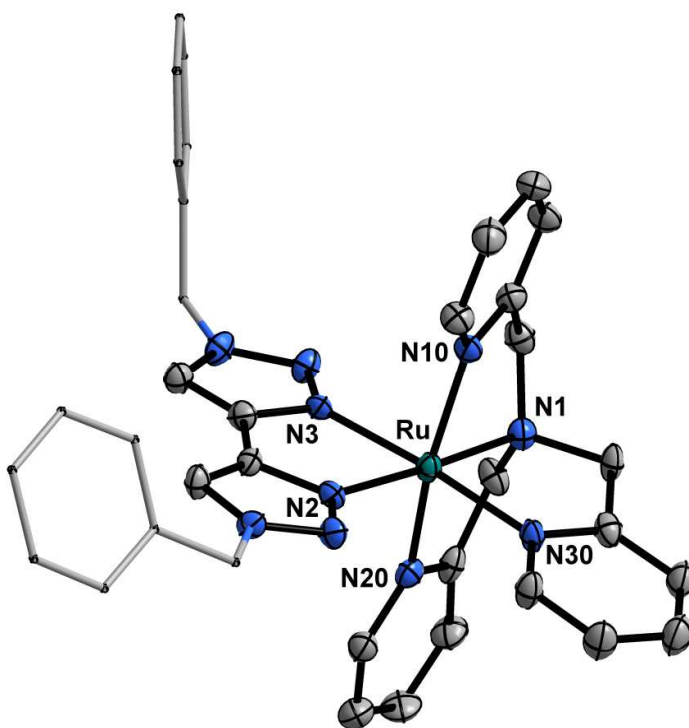

**Figure S31.** Perspective view of  $7^{2+}$ . The thermal ellipsoids are drawn at the 50% probability level, and the benzyl moieties are drawn as stick models. H atoms, counterions, and crystal solvent molecules are omitted for clarity.

**Table S1.** Important bondlengths and angles of **1**<sup>2+</sup>–**4**<sup>2+</sup> and **7**<sup>2+</sup>. Lengths of bonds featuring triazoles are highlighted in grey. <sup>a</sup> Atom numbering is different in **1**<sup>2+</sup>.

| [Å] <sup>a</sup> | <b>1</b> <sup>2+</sup> | <b>2</b> <sup>2+</sup> | <b>3</b> <sup>2+</sup> | <b>4</b> <sup>2+</sup> | <b>7</b> <sup>2+</sup> |
|------------------|------------------------|------------------------|------------------------|------------------------|------------------------|
| Ru–N1            | 2.085(3)               | 2.118(4)               | 2.144(4)               | 2.162(2) / 2.166(2)    | 2.079(5)               |
| Ru–N2            | 2.065(3)               | 2.064(4)               | 2.058(4)               | 2.068(2) / 2.064(2)    | 2.072(5)               |
| Ru–N3            | 2.101(3)               | 2.090(4)               | 2.100(4)               | 2.110(2) / 2.103(2)    | 2.072(5)               |
| Ru–N10           | 2.078(3)               | 2.071(4)               | 2.070(4)               | 2.063(2) / 2.046(3)    | 2.069(5)               |
| Ru–N20           | 2.048(3)               | 2.059(4)               | 2.059(4)               | 2.074(2) / 2.051(2)    | 2.053(5)               |
| Ru–N30           | 2.102(3)               | 2.041(4)               | 2.049(4)               | 2.052(2) / 2.054(2)    | 2.055(5)               |
| C–H···N          |                        | 2.287(4)               | 2.255(4)               | 2.284(2) / 2.294(2)    | 2.395(6)               |
| [°]              |                        |                        |                        |                        |                        |
| N1–Ru–N2         | 175.9(1)               | 177.18(16)             | 172.77(16)             | 178.40(9) / 178.37(9)  | 176.8(2)               |
| N10–Ru–N20       | 163.0(1)               | 163.07(15)             | 161.30(16)             | 159.41(9) / 160.35(9)  | 164.0(2)               |
| N3–Ru–N30        | 167.9(1)               | 174.25(15)             | 176.19(16)             | 177.90(9) / 177.49(9)  | 175.7(2)               |
| N1–Ru–N30        | 79.1(1)                | 79.17(15)              | 79.53(16)              | 79.22(9) / 79.22(9)    | 82.5(2)                |
| N1–Ru–N10        | 80.6(1)                | 80.74(16)              | 80.44(16)              | 79.87(9) / 80.75(10)   | 81.4(2)                |
| N1–Ru–N20        | 83.5(1)                | 82.33(15)              | 81.05(16)              | 79.56(9) / 79.22(9)    | 82.9(2)                |
| N10–Ru–N30       | 101.9(1)               | 91.34(16)              | 87.77(16)              | 85.83(9) / 85.11(9)    | 93.8(2)                |
| N20–Ru–N30       | 80.7(1)                | 85.67(15)              | 91.45(16)              | 89.33(9) / 94.75(9)    | 87.3(2)                |
| N2–Ru–N30        | 100.6(1)               | 99.65(15)              | 99.06(16)              | 100.13(9) / 99.53(9)   | 100.6(2)               |
| N2–Ru–N3         | 77.3(1)                | 77.94(15)              | 77.70(16)              | 77.84(9) / 78.30(9)    | 77.0(2)                |
| Torsion angle    | 42.9                   | 15.5                   | 0.4                    | 0.4 / 0.9              | 12.1                   |

**Table S2.** Crystallographic parameters of **2**<sup>2+</sup>–**4**<sup>2+</sup> and **7**<sup>2+</sup>.

|                                                                              | <b>2</b> (PF <sub>6</sub> ) <sub>2</sub> ·0.25H <sub>2</sub> O                                     | <b>3</b> (PF <sub>6</sub> ) <sub>2</sub> ·MeOH                                     | <b>4</b> (PF <sub>6</sub> ) <sub>2</sub> ·0.25MeOH                                                     | <b>7</b> (PF <sub>6</sub> ) <sub>2</sub> ·MeOH                                     |
|------------------------------------------------------------------------------|----------------------------------------------------------------------------------------------------|------------------------------------------------------------------------------------|--------------------------------------------------------------------------------------------------------|------------------------------------------------------------------------------------|
| Formula                                                                      | C <sub>32</sub> H <sub>30</sub> F <sub>12</sub> N <sub>8</sub> O <sub>0.25</sub> P <sub>2</sub> Ru | C <sub>37</sub> H <sub>38</sub> F <sub>12</sub> N <sub>10</sub> OP <sub>2</sub> Ru | C <sub>40.25</sub> H <sub>38</sub> F <sub>12</sub> N <sub>12</sub> O <sub>0.25</sub> P <sub>2</sub> Ru | C <sub>37</sub> H <sub>38</sub> F <sub>12</sub> N <sub>10</sub> OP <sub>2</sub> Ru |
| <i>M<sub>r</sub></i>                                                         | 921.65                                                                                             | 1029.78                                                                            | 1087.84                                                                                                | 1029.78                                                                            |
| <i>T</i> [K]                                                                 | 100(2)                                                                                             | 100(2)                                                                             | 100(2)                                                                                                 | 140(2)                                                                             |
| <i>λ</i> [Å]                                                                 | 0.71073                                                                                            | 0.71073                                                                            | 0.71073                                                                                                | 0.71073                                                                            |
| Crystal system                                                               | orthorhombic                                                                                       | triclinic                                                                          | triclinic                                                                                              | orthorhombic                                                                       |
| Space group                                                                  | Pcaa                                                                                               | P $\bar{1}$                                                                        | P $\bar{1}$                                                                                            | Pbca                                                                               |
| <i>a</i> [Å]                                                                 | 17.888(5)                                                                                          | 11.138(3)                                                                          | 13.842(4)                                                                                              | 13.782(4)                                                                          |
| <i>b</i> [Å]                                                                 | 18.350(6)                                                                                          | 12.996(4)                                                                          | 13.903(4)                                                                                              | 17.532(5)                                                                          |
| <i>c</i> [Å]                                                                 | 22.569(7)                                                                                          | 14.487(4)                                                                          | 23.006(7)                                                                                              | 33.900(9)                                                                          |
| <i>α</i> [°]                                                                 | 90.00                                                                                              | 78.682(5)                                                                          | 88.429(6)                                                                                              | 90.00                                                                              |
| <i>β</i> [°]                                                                 | 90.00                                                                                              | 87.424(6)                                                                          | 85.538(7)                                                                                              | 90.00                                                                              |
| <i>γ</i> [°]                                                                 | 90.00                                                                                              | 84.084(6)                                                                          | 79.015(6)                                                                                              | 90.00                                                                              |
| Cell volume [Å <sup>3</sup> ]                                                | 7408(4)                                                                                            | 2044.6(10)                                                                         | 4333(2)                                                                                                | 8191(4)                                                                            |
| <i>Z</i>                                                                     | 8                                                                                                  | 2                                                                                  | 1                                                                                                      | 8                                                                                  |
| <i>D</i> <sub>calcd.</sub> [g cm <sup>−3</sup> ]                             | 1.653                                                                                              | 1.673                                                                              | 1.668                                                                                                  | 1.670                                                                              |
| <i>μ</i> [mm <sup>−1</sup> ]                                                 | 0.608                                                                                              | 0.563                                                                              | 0.536                                                                                                  | 0.562                                                                              |
| <i>F</i> (000)                                                               | 3696                                                                                               | 1040                                                                               | 2196                                                                                                   | 4160                                                                               |
| Radiation type                                                               | Mo-Kα                                                                                              | Mo-Kα                                                                              | Mo-Kα                                                                                                  | Mo-Kα                                                                              |
| Crystal size [mm]                                                            | 0.35 × 0.21 × 0.05                                                                                 | 0.25 × 0.20 × 0.02                                                                 | 0.45 × 0.15 × 0.15                                                                                     | 0.70 × 0.10 × 0.09                                                                 |
| <i>θ</i> limits [°]                                                          | 1.80–25.08                                                                                         | 1.43–27.54                                                                         | 0.89–25.41                                                                                             | 1.20–26.43                                                                         |
| Refl. collected                                                              | 75311                                                                                              | 26528                                                                              | 47658                                                                                                  | 24101                                                                              |
| Independent refl.                                                            | 6551                                                                                               | 9300                                                                               | 15799                                                                                                  | 8311                                                                               |
| Obsvd. [ <i>I</i> > 2σ( <i>I</i> )]                                          | 4915                                                                                               | 6312                                                                               | 11075                                                                                                  | 4835                                                                               |
| refl.                                                                        |                                                                                                    |                                                                                    |                                                                                                        |                                                                                    |
| Data/restraints/param.                                                       | 6551/0/558                                                                                         | 9300/0/570                                                                         | 15799/1/1222                                                                                           | 8311/0/570                                                                         |
| GoF in <i>F</i> <sup>2</sup>                                                 | 1.059                                                                                              | 1.056                                                                              | 1.049                                                                                                  | 1.027                                                                              |
| <i>R</i> <sub>int</sub>                                                      | 0.0607                                                                                             | 0.0616                                                                             | 0.0522                                                                                                 | 0.0720                                                                             |
| <i>R</i> <sub>1</sub> [ <i>F</i> <sup>2</sup> > 2σ( <i>F</i> <sup>2</sup> )] | 0.0667                                                                                             | 0.0596                                                                             | 0.0513                                                                                                 | 0.0515                                                                             |
| <i>wR</i> <sub>2</sub> ( <i>F</i> <sup>2</sup> )                             | 0.2081                                                                                             | 0.1551                                                                             | 0.1441                                                                                                 | 0.1631                                                                             |
| <i>Δρ</i> <sub>max</sub> , <i>Δρ</i> <sub>min</sub> [e Å <sup>−3</sup> ]     | 2.067, −0.982                                                                                      | 1.342, −1.282                                                                      | 1.860, −1.004                                                                                          | 0.782, −0.888                                                                      |
| CCDC                                                                         | 918972                                                                                             | 918973                                                                             | 918974                                                                                                 | 1015560                                                                            |



## Electrochemistry

In DCM, all complexes show one reversible oxidation process, which is a metal-centered  $\text{Ru}^{\text{II}}$ -to- $\text{Ru}^{\text{III}}$  process. The oxidation potential remains unaffected by the substitution of pyridine rings by triazoles (Table S3). On the reduction side of the cyclic voltammograms, only irreversible processes were observed in DCM. When measured in acetonitrile, the bipyridine-containing complexes ( $\mathbf{1}^{2+}$ – $\mathbf{4}^{2+}$ ) show reversible reduction processes, which become irreversible when pyridine rings of the bidentate ligand are substituted ( $\mathbf{5}^{2+}$ – $\mathbf{7}^{2+}$ ). Upon triazole-for-pyridine substitution in the bidentate ligand ( $\mathbf{5}^{2+}$ – $\mathbf{7}^{2+}$ ), the peak potential of the irreversible reduction process shifts drastically to more negative values (–2.59 V vs ferrocen for  $\mathbf{6}^{2+}$ ). Hence, the reduction is a one-electron process centered on the bidentate ligand. This is corroborated by EPR spectra of the reduced species of  $\mathbf{1}^{2+}$ – $\mathbf{4}^{2+}$ . Figure S56 shows the experimental and simulated EPR spectra of  $\mathbf{2}^+$ . When the CV of the  $\text{Ru}^{\text{II}}/\text{Ru}^{\text{III}}$  oxidation process of  $\mathbf{1}^{2+}$  is measured in acetonitrile, two irreversible oxidation waves at 0.71 and 0.94 V (vs  $\text{Fc}/\text{Fc}^+$ ) are observed. The CV of  $[\mathbf{1}(\text{CH}_3\text{CN})]^{2+}$  (formed by heating) only shows the second irreversible oxidation. Hence, the oxidation of  $\mathbf{1}^{2+}$  in the first process leads to the formation of  $[\mathbf{1}(\text{CH}_3\text{CN})]^{2+}$ . This reaction can be rationalized by the pathway shown in Scheme S6.

**Table S3.** Redox potentials of the complexes  $\mathbf{1}^{2+}$ – $\mathbf{7}^{2+}$  measured at 100 mV/s with 0.1 M  $\text{Bu}_4\text{NPF}_6$  and referenced vs the ferrocene/ferrocenium couple. <sup>a</sup> peak potentials of the forward processes are given.

| Complex                                                        | $\mathbf{1}^{2+}$                        | $\mathbf{2}^{2+}$               | $\mathbf{3}^{2+}$                        | $\mathbf{4}^{2+}$                        | $\mathbf{5}^{2+}$  | $\mathbf{6}^{2+}$  | $\mathbf{7}^{2+}$  |
|----------------------------------------------------------------|------------------------------------------|---------------------------------|------------------------------------------|------------------------------------------|--------------------|--------------------|--------------------|
| Oxidation in DCM [V] (peak separation [mV])                    | 0.75 (81)                                | 0.75 (76)                       | 0.76 (85)                                | 0.76 (85)                                | 0.76 (92)          | 0.76 (118)         | 0.76 (103)         |
| Oxidation in $\text{CH}_3\text{CN}$ [V] (peak separation [mV]) | 0.71 <sup>a</sup> ;<br>0.94 <sup>a</sup> | 0.69 (69);<br>0.91 <sup>a</sup> | 0.70 <sup>a</sup> ;<br>0.87 <sup>a</sup> | 0.72 <sup>a</sup> ;<br>0.85 <sup>a</sup> | 0.77 (65)          | 0.76 (70)          | 0.72 (70)          |
| Reduction in $\text{CH}_3\text{CN}$ [V] (peak separation [mV]) | –1.83 (75)                               | –1.86 (75)                      | –1.88 (68)                               | –1.89 (66)                               | –2.36 <sup>a</sup> | –2.59 <sup>a</sup> | –2.40 <sup>a</sup> |

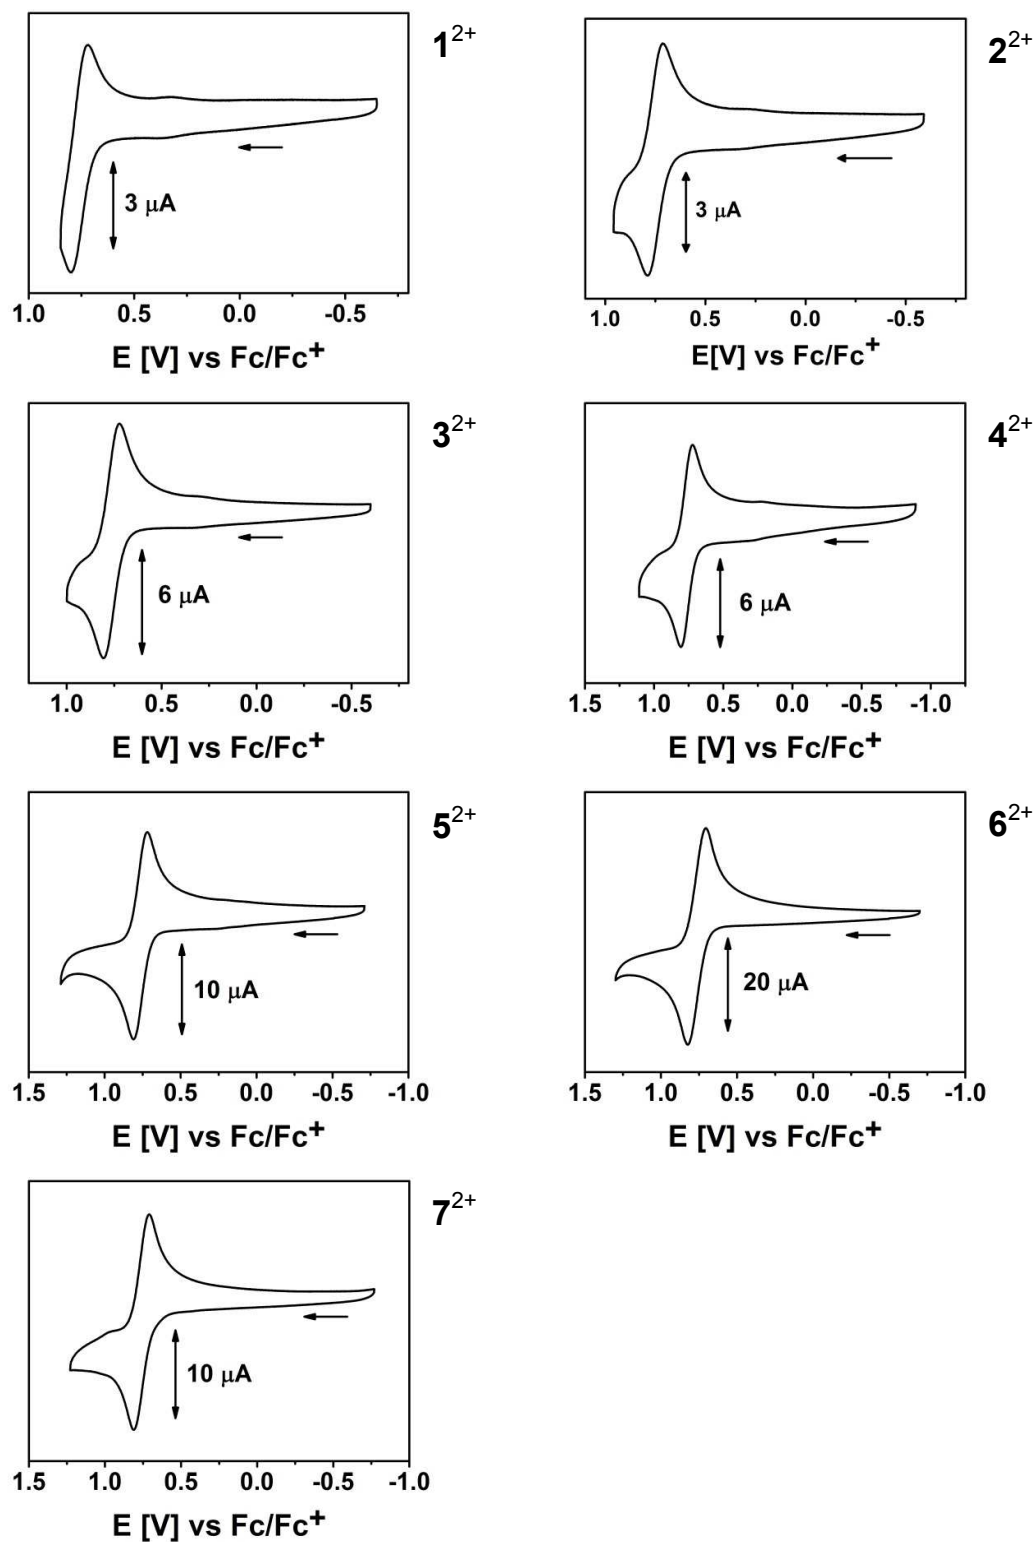

**Figure S32.** Cyclic voltammograms of the oxidation processes of  $1^{2+}$ – $7^{2+}$  measured in DCM at 100 mV/s with 0.1 M  $\text{Bu}_4\text{NPF}_6$ .

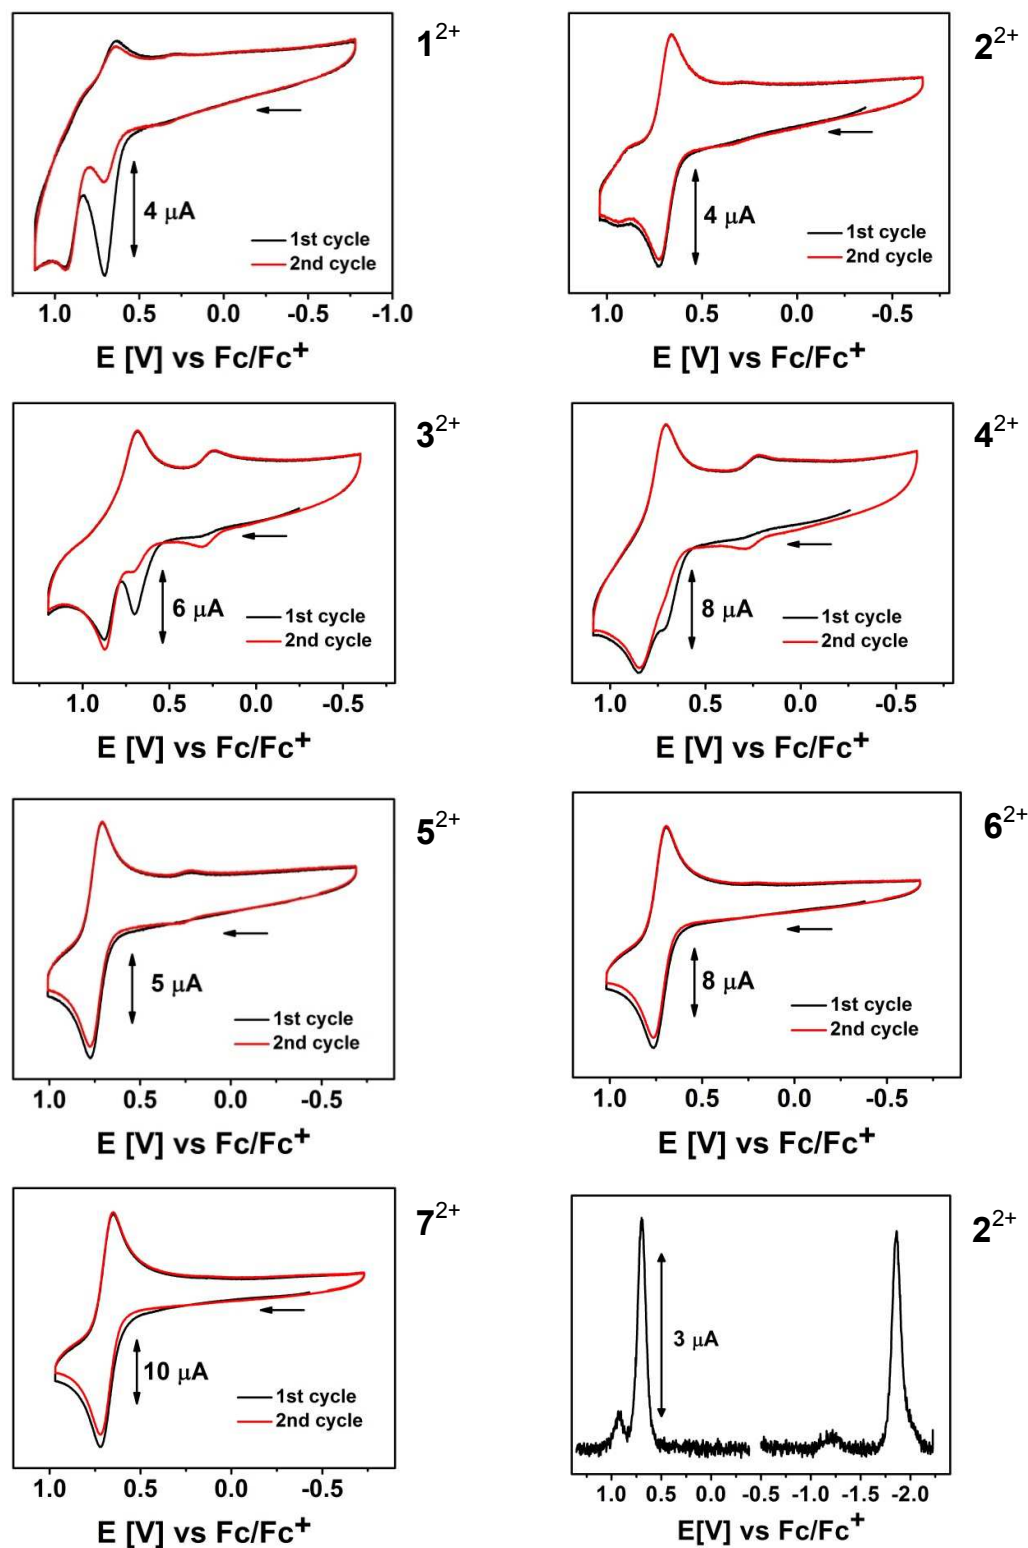

**Figure S33.** Cyclic voltammograms of the oxidation processes of  $1^{2+}$ – $7^{2+}$  measured in  $CH_3CN$  at 100 mV/s with 0.1 M  $Bu_4NPF_6$ . Bottom right: Differential pulse voltammogram of the oxidation and reduction process of  $2^{2+}$ .

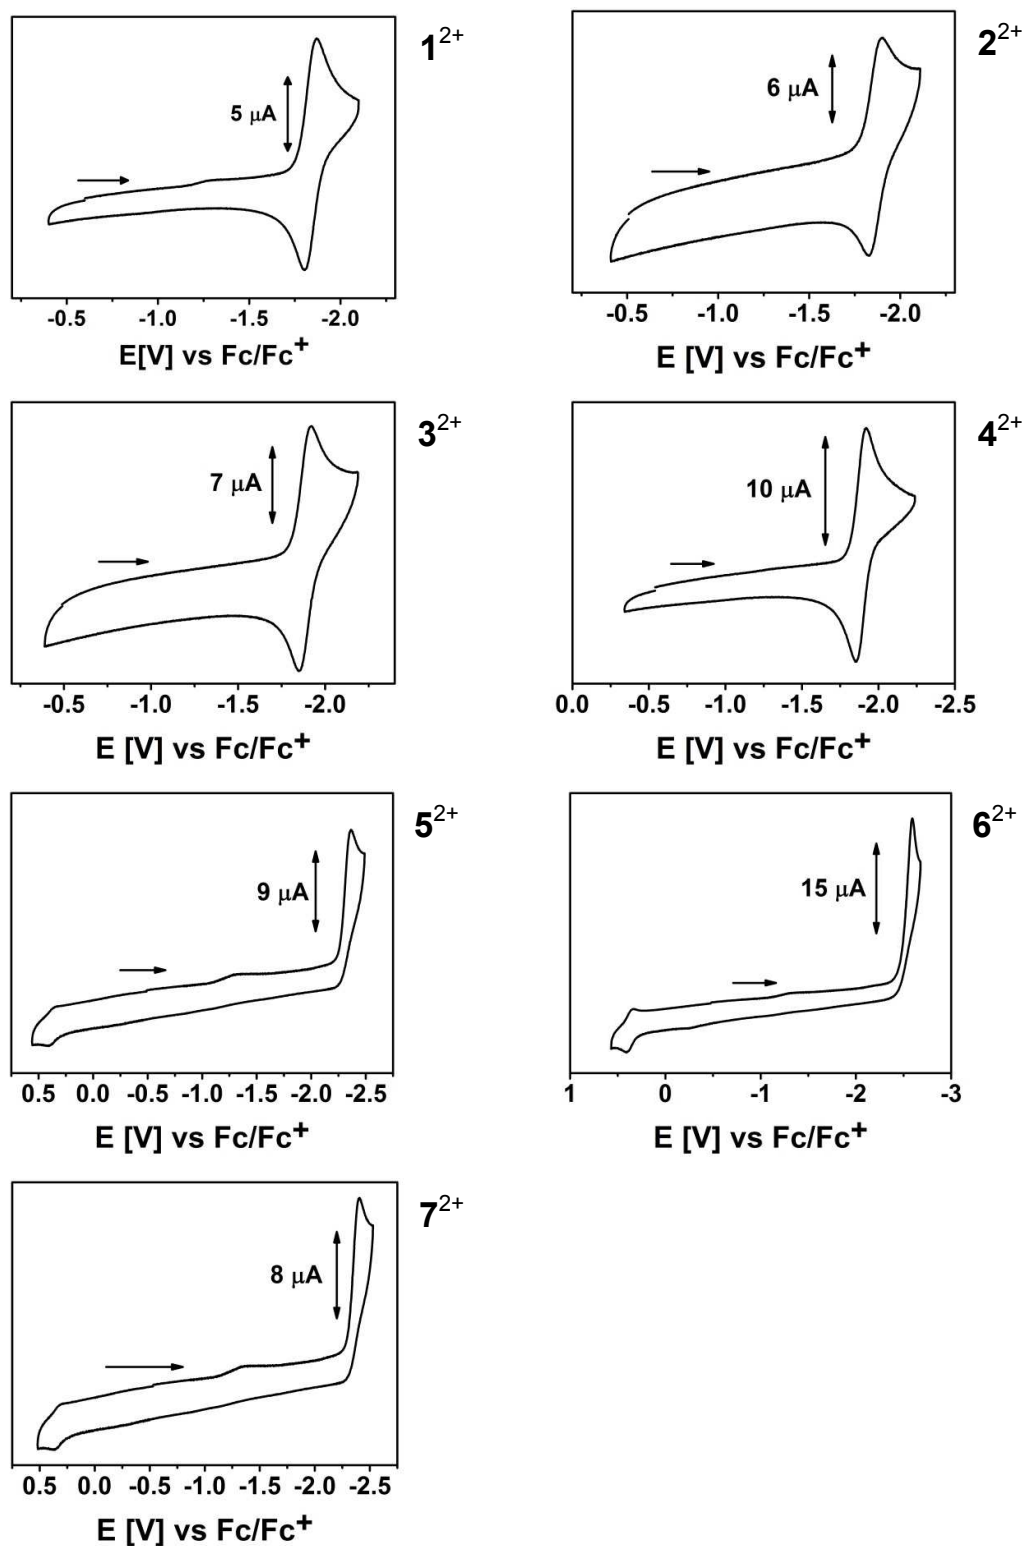

**Figure S34.** Cyclic voltammograms of the reduction processes of  $1^{2+}$ – $7^{2+}$  measured in  $\text{CH}_3\text{CN}$  at  $100 \text{ mV/s}$  with  $0.1 \text{ M Bu}_4\text{NPF}_6$ .

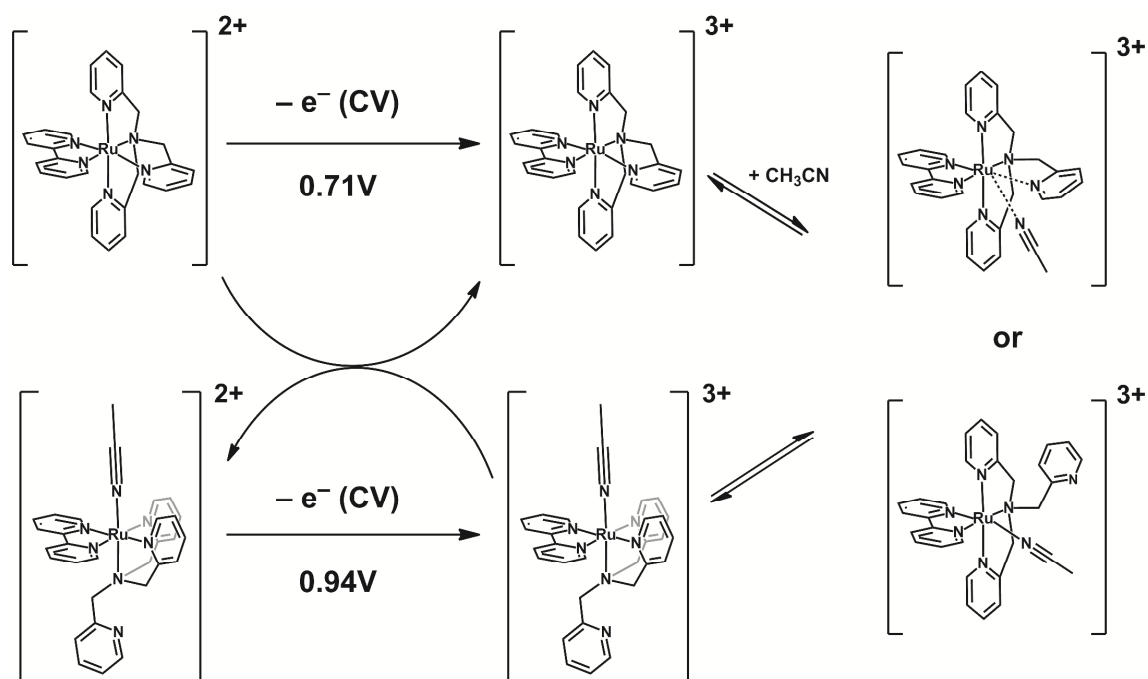

**Scheme S6.** Redox-triggered reactivity of  $1^{2+}$  in acetonitrile.

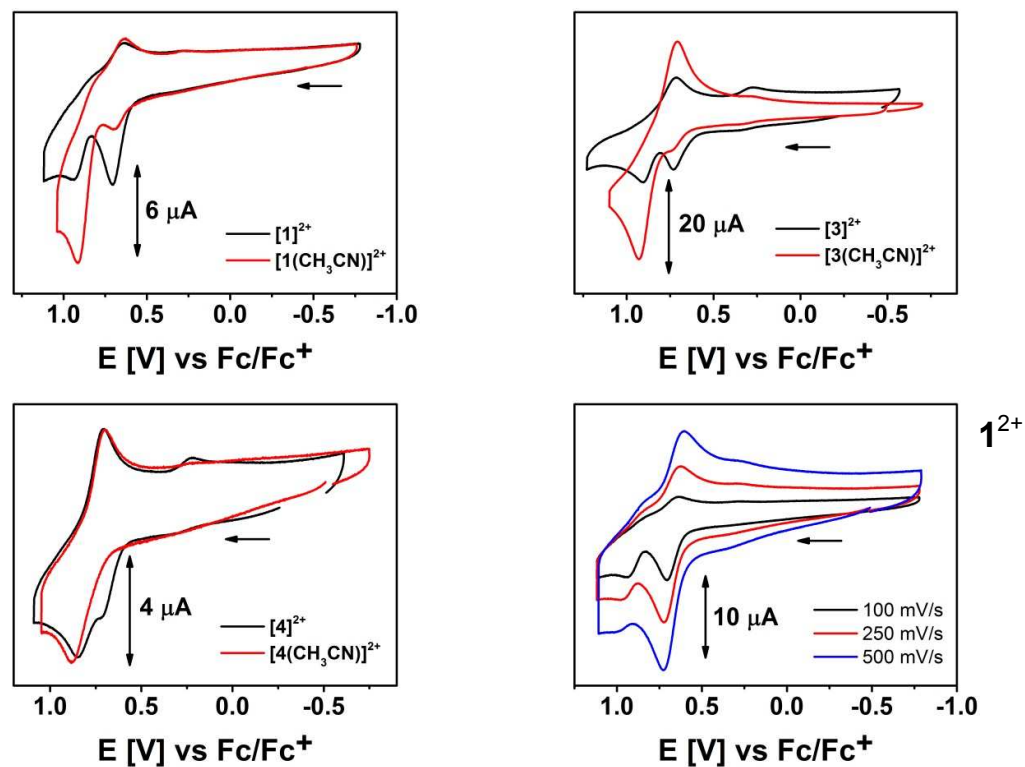

**Figure S35.** Cyclic voltammograms of the oxidation processes of  $[1(\text{CH}_3\text{CN})]^{2+}$ ,  $[3(\text{CH}_3\text{CN})]^{2+}$ , and  $[4(\text{CH}_3\text{CN})]^{2+}$  measured in  $\text{CH}_3\text{CN}$  at 100 mV/s with 0.1 M  $\text{Bu}_4\text{NPF}_6$ . Bottom right: Cyclic voltammograms of the oxidation process of  $1^{2+}$  measured in  $\text{CH}_3\text{CN}$  at different scan rates.

## CV Simulation

On the basis of the proposed redox reaction mechanism, we were able to simulate the CVs of  $\mathbf{1}^{2+}$ – $\mathbf{4}^{2+}$ ,  $[\mathbf{1}(\text{CH}_3\text{CN})]^{2+}$ ,  $[\mathbf{3}(\text{CH}_3\text{CN})]^{2+}$ , and  $[\mathbf{4}(\text{CH}_3\text{CN})]^{2+}$  in acetonitrile at different scan rates. The simulated voltammograms match the experimental ones well, and the parameters used for the simulations are summarized in Table S4. Figures S37–S40 Show a comparison of the simulated and experimental voltammograms. The following reactions were included in the simulation.

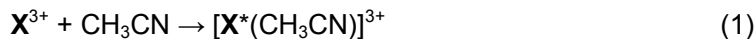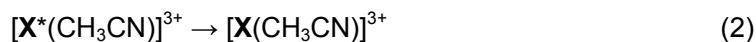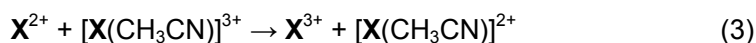

Here,  $\mathbf{X}^{n+}$  is the starting complex with all tripod arms attached,  $[\mathbf{X}^*(\text{CH}_3\text{CN})]^{n+}$  is an intermediate, and  $[\mathbf{X}(\text{CH}_3\text{CN})]^{n+}$  is the acetonitrile adduct with a de-coordinated tripod arm.

**Table S4.** Parameters used for the simulation of cyclic voltammograms.

| Reaction                                                                                                                          |                                                     | $\mathbf{1}^{2+}$ | $\mathbf{2}^{2+}$ | $\mathbf{3}^{2+}$ | $\mathbf{4}^{2+}$ |
|-----------------------------------------------------------------------------------------------------------------------------------|-----------------------------------------------------|-------------------|-------------------|-------------------|-------------------|
| $\mathbf{X}^{3+} + \text{CH}_3\text{CN} \rightarrow [\mathbf{X}^*(\text{CH}_3\text{CN})]^{3+}$                                    | $K_1$                                               | 1                 | 0.005             | 0.2               | 0.3               |
|                                                                                                                                   | $k_{f1}$<br>[s <sup>-1</sup> ]                      | 6                 | 6                 | 12                | 12                |
|                                                                                                                                   | $k_{b1}$<br>[s <sup>-1</sup> ]                      | 6                 | 1200              | 60                | 40                |
| $[\mathbf{X}^*(\text{CH}_3\text{CN})]^{3+} \rightarrow [\mathbf{X}(\text{CH}_3\text{CN})]^{3+}$                                   | $K_2$                                               | 0.04              | 0.2               | 0.4               | 0.8               |
|                                                                                                                                   | $k_{f2}$<br>[s <sup>-1</sup> ]                      | 2.5               | 2.5               | 12                | 20                |
|                                                                                                                                   | $k_{b2}$<br>[s <sup>-1</sup> ]                      | 62.5              | 12.5              | 30                | 25                |
| $\mathbf{X}^{2+} + [\mathbf{X}(\text{CH}_3\text{CN})]^{3+} \rightarrow \mathbf{X}^{3+} + [\mathbf{X}(\text{CH}_3\text{CN})]^{2+}$ | $K_3$                                               | 11379             | 11379             | 1102              | 158               |
|                                                                                                                                   | $k_{f3}$<br>[L·mol <sup>-1</sup> ·s <sup>-1</sup> ] | 10 <sup>7</sup>   | 10 <sup>7</sup>   | 10 <sup>7</sup>   | 10 <sup>7</sup>   |
|                                                                                                                                   | $k_{b3}$<br>[L·mol <sup>-1</sup> ·s <sup>-1</sup> ] | 879               | 879               | 9077              | 63526             |
| $[\mathbf{X}^*(\text{CH}_3\text{CN})]^{2+} / [\mathbf{X}^*(\text{CH}_3\text{CN})]^{3+}$                                           |                                                     | 0.36 V            | 0.35 V            | 0.36 V            | 0.33 V            |
| $\mathbf{X}^{2+} / \mathbf{X}^{3+}$                                                                                               |                                                     | 0.71 V            | 0.72 V            | 0.70 V            | 0.72 V            |
| $[\mathbf{X}(\text{CH}_3\text{CN})]^{2+} / [\mathbf{X}(\text{CH}_3\text{CN})]^{3+}$                                               |                                                     | 0.97 V            | 0.96 V            | 0.88 V            | 0.85 V            |

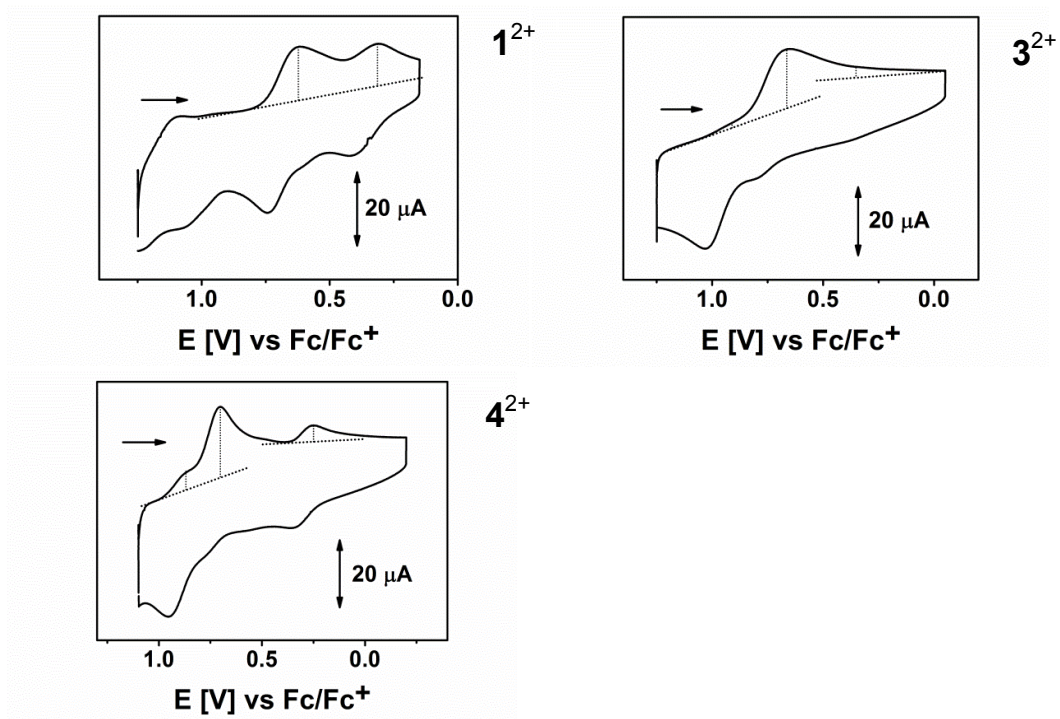

**Figure S36.** Fast cathodic scans (500 mV/s) after electrolysis at high positive potential.

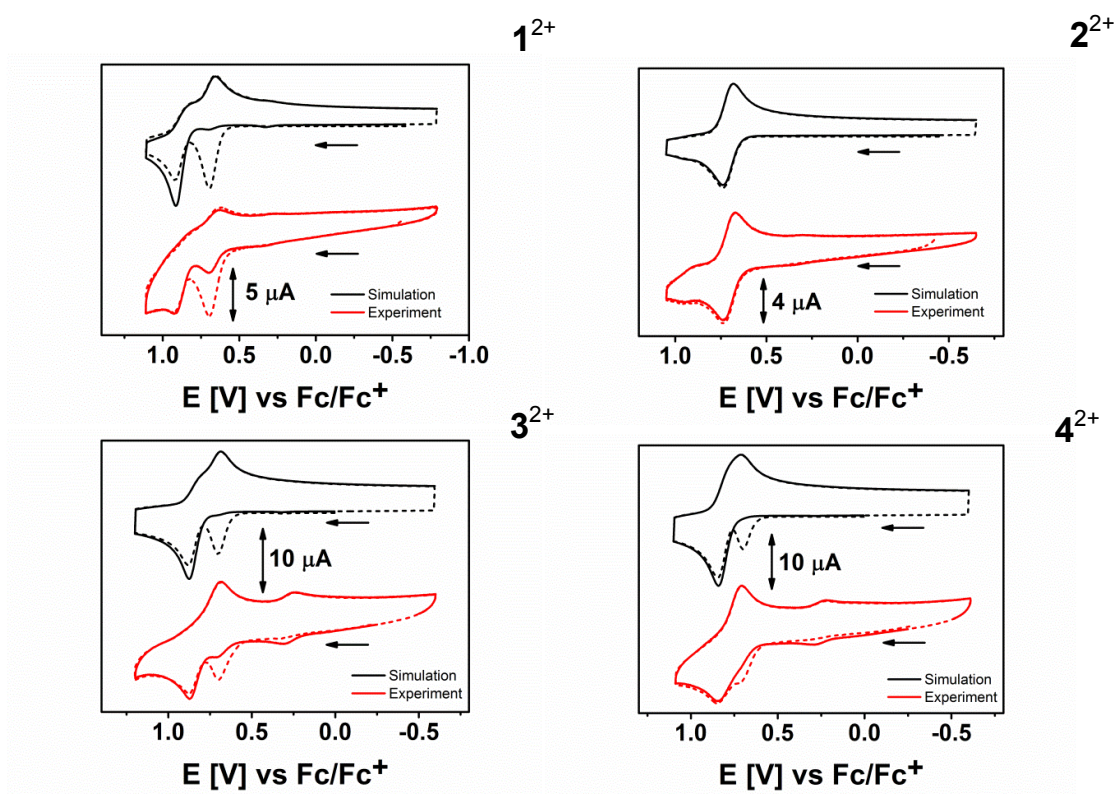

**Figure S37.** Comparison of simulated and experimental CVs measured at 100 mV/s in  $\text{CH}_3\text{CN}$  with 0.1 M  $\text{Bu}_4\text{NPF}_6$ . Dotted lines indicate the first cycles, straight lines indicate the second cycles.



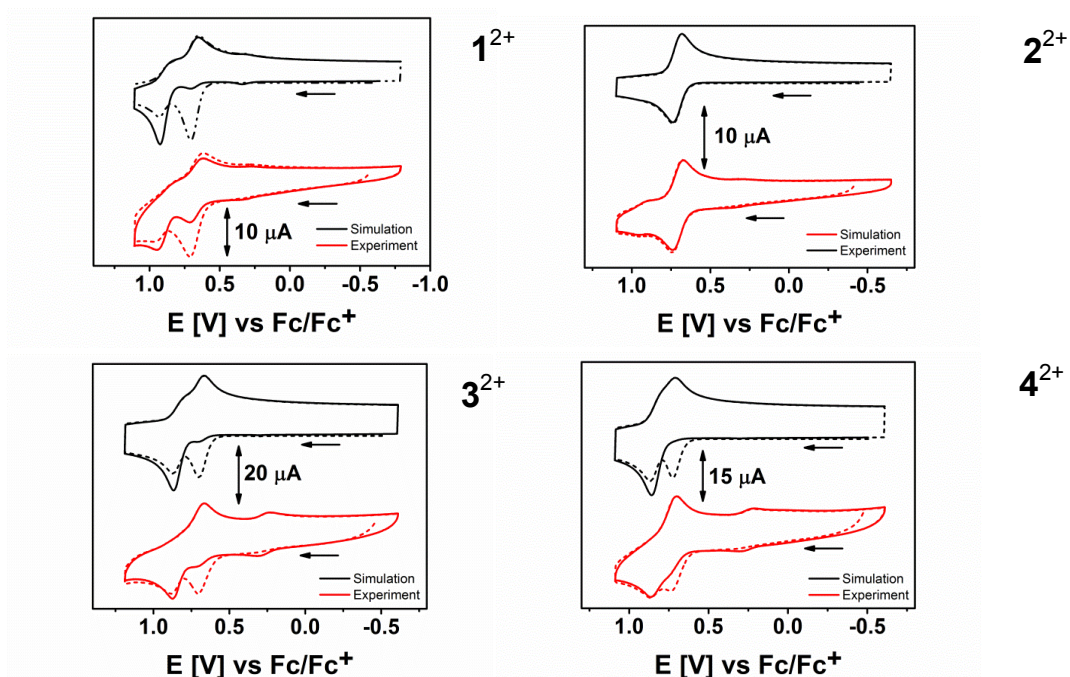

**Figure S38.** Comparison of simulated and experimental CVs measured at 250 mV/s in  $CH_3CN$  with 0.1 M  $Bu_4NPF_6$ . Dotted lines indicate the first cycles, straight lines indicate the second cycles.

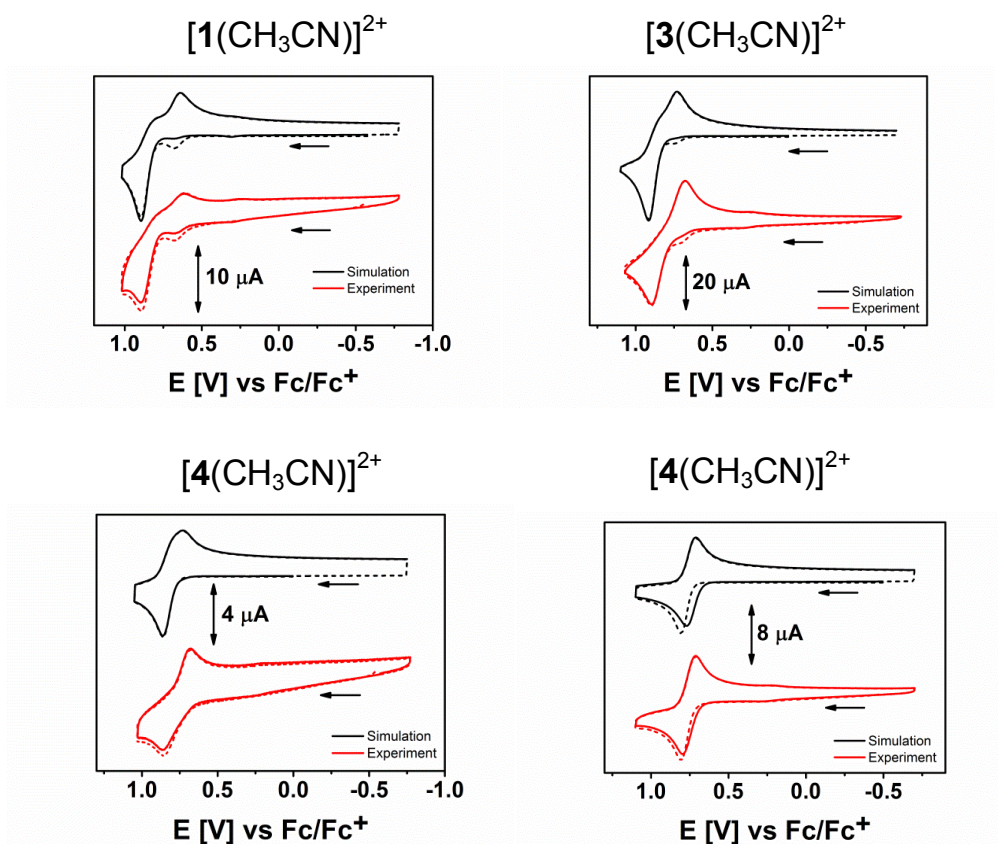

**Figure S39.** Comparison of simulated and experimental CVs measured at 100 mV/s in  $CH_3CN$  with 0.1 M  $Bu_4NPF_6$ . Dotted lines indicate the first cycles, straight lines indicate the second cycles. The CV shown at the bottom right side was measured in DCM.



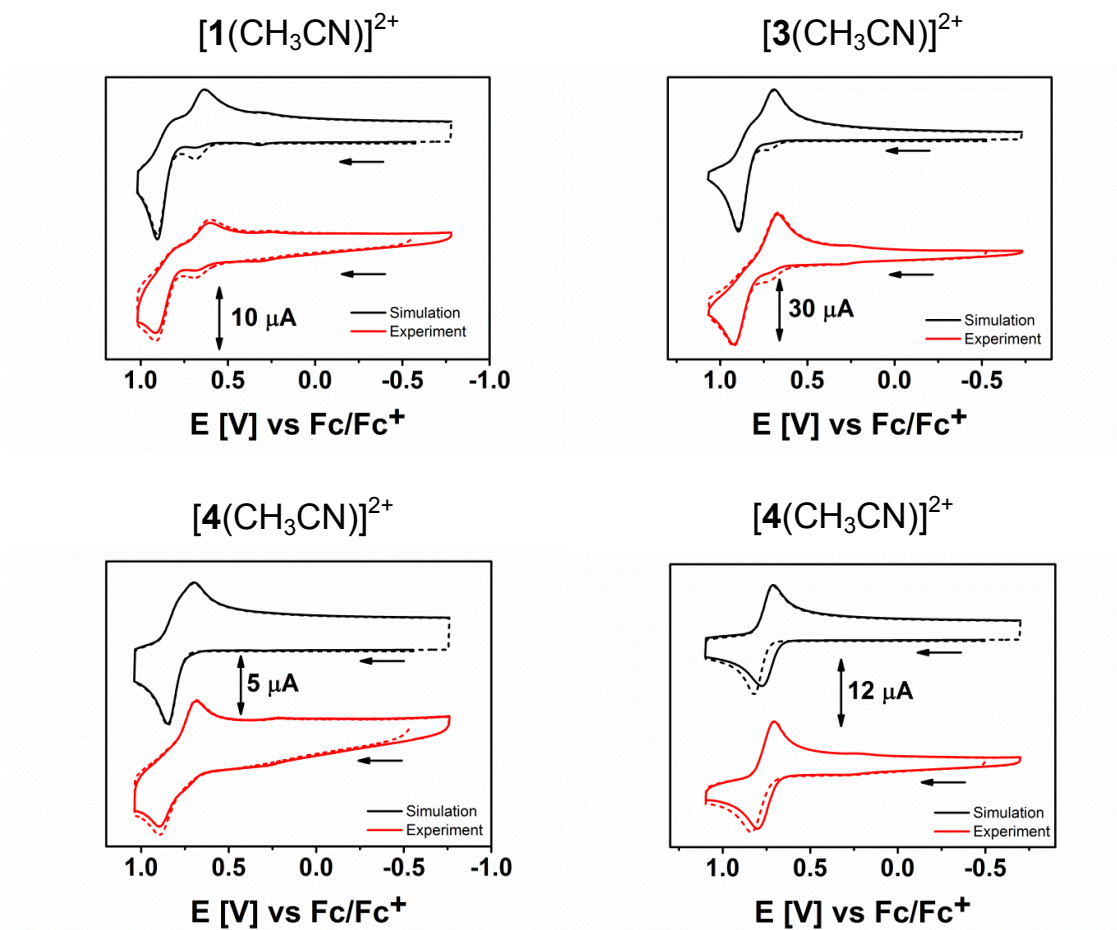

**Figure S40.** Comparison of simulated and experimental CVs measured at 250 mV/s in  $CH_3CN$  with 0.1 M  $Bu_4NPF_6$ . Dotted lines indicate the first cycles, straight lines indicate the second cycles. The CV shown at the bottom right side was measured in DCM.

## Bulk Electrolysis

We placed  $1^{2+}$  (3.2 mg, 0.004 mmol) in acetonitrile (12 mL) in the working-electrode compartment of a bulk-electrolysis cell and applied a voltage of 0.9 V (vs  $\text{Fc}/\text{Fc}^+$ ) at the working electrode while stirring. Prior to addition of  $1^{2+}$ , the solution containing only electrolyte had been electrolyzed at the same potential until the background current was close to 0 A. Upon oxidation, we started monitoring the electrolysis solution by UV/vis spectroscopy by taking small samples of 0.1 mL and diluting them in a cuvette, and we observed a complete transformation from the spectrum of  $1^{2+}$  to a spectrum matching that of pure  $[1(\text{CH}_3\text{CN})]^{2+}$  (obtained by heating of  $1^{2+}$ ). The solution was electrolyzed two times for 60 s to achieve a complete transformation of  $1^{2+}$ . The total charge transferred at the working electrode during the experiment was 14.9 mC, which corresponds to 0.00008 mmol of electrons or 2% of the complex molecules.

Furthermore, we placed  $1^{2+}$  (5.1 mg, 0.006 mmol) in DCM/ $\text{CH}_3\text{CN}$  (99:1, 12 mL) in a bulk electrolysis cell and applied a voltage of 0.9 V in several intervals for a total time of 35 min. After this time, the starting UV/vis spectrum of  $1^{2+}$  had turned into that of  $[1(\text{CH}_3\text{CN})]^{2+}$ . The total amount charge transferred at the working electrode during the experiment was 263 mC, which corresponds to 0.0027 mmol of electrons or 45% of the complex molecules. However, when one compares the spectrum obtained at the end of the experiment with that of  $[1(\text{CH}_3\text{CN})]^{2+}$  obtained through heating and with that of  $1^{3+}$  obtained in the OTTLE cell, it is evident that the amount of oxidized complex  $1^{3+}$  must be much less than 45%. Hence, there are additional oxidation processes at the working electrode, which do not involve the complex, and this could be due to relatively high potential applied. Therefore, the amount of complex oxidized in the second electrolysis experiment could not be determined with certainty. However, because the final spectrum matches that of pure  $[1(\text{CH}_3\text{CN})]^{2+}$  very well, we estimate that the amount of  $1^{3+}$  is <10%.

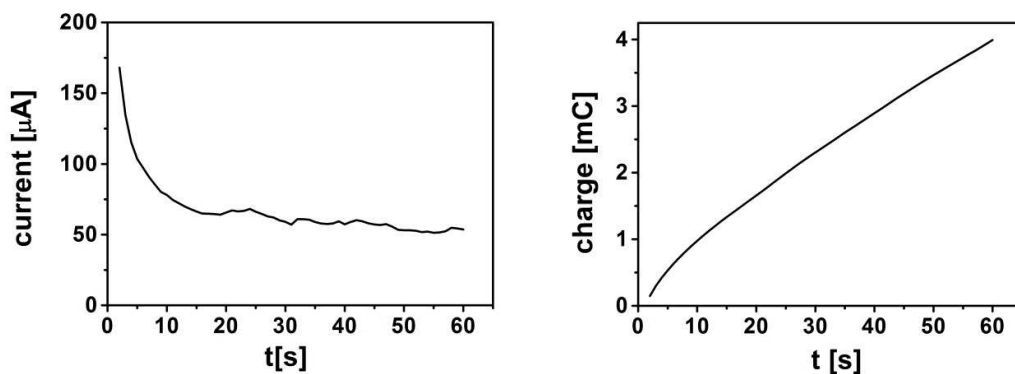

**Figure S41.** Typical current (left) and charge (right) curves, measured during the electrolysis of  $1^{2+}$  in  $\text{CH}_3\text{CN}$ .

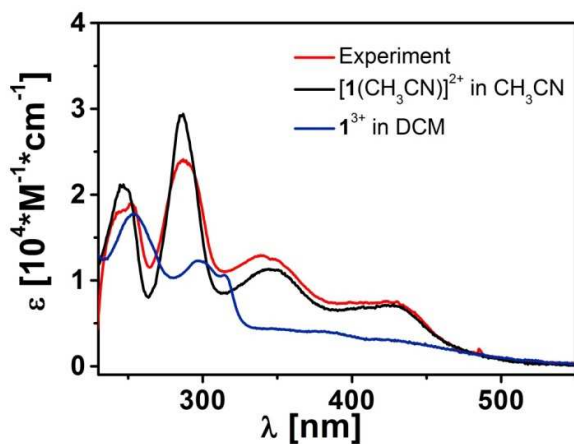

**Figure S42.** UV/Vis-spectrum (red) obtained after electrolyzing  $1^{2+}$  in  $\text{CH}_3\text{CN}$  for 2 minutes compared to spectra of  $[1(\text{CH}_3\text{CN})]^{2+}$  and  $1^{3+}$ .

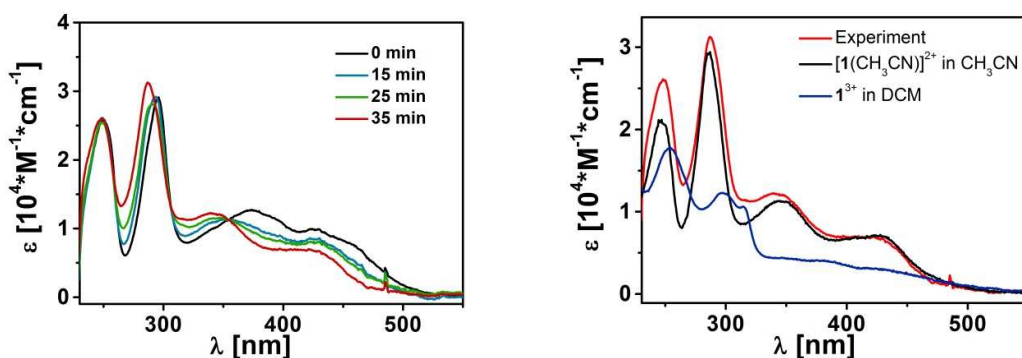

**Figure S43.** UV/Vis-spectra (left) recorded during the electrolysis of  $1^{2+}$  in  $\text{DCM}/\text{CH}_3\text{CN}$  (99:1). UV/Vis-spectrum (left, red) obtained after electrolyzing  $1^{2+}$   $\text{DCM}/\text{CH}_3\text{CN}$  (99:1) for 35 minutes compared to spectra of  $[1(\text{CH}_3\text{CN})]^{2+}$  and  $1^{3+}$ .

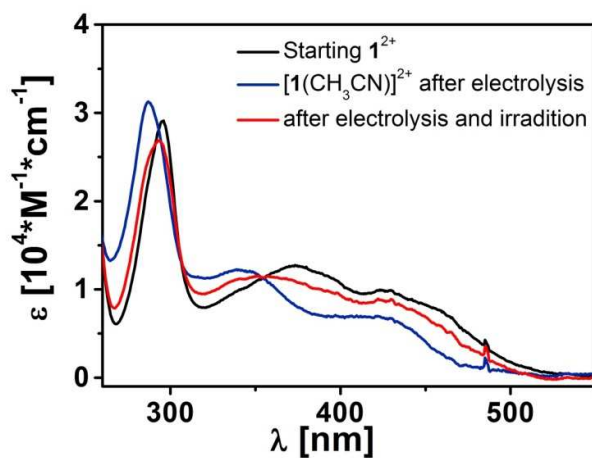

**Figure S44.** UV/Vis-spectra recorded before (black) and after (blue) the electrolysis of  $1^{2+}$  in  $\text{DCM}/\text{CH}_3\text{CN}$  (99:1). When after electrolysis the solution was irradiated at 369 nm, the red spectrum was obtained.

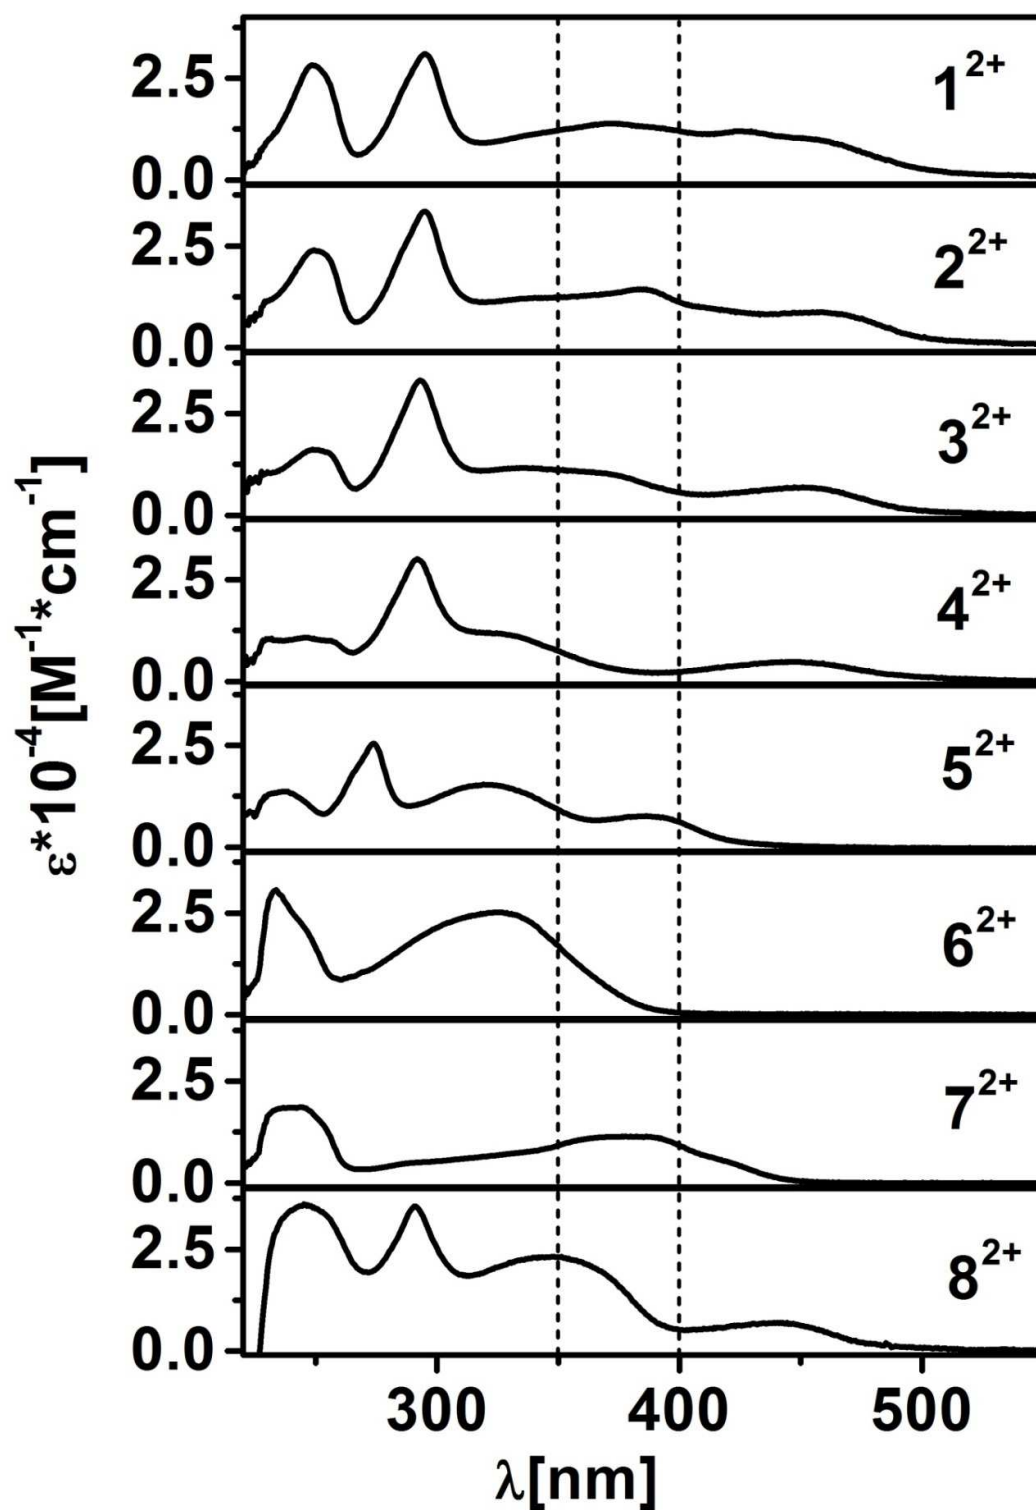

**Figure S45.** UV/Vis spectra of the complexes  $1^{2+}$ – $8^{2+}$  recorded in DCM. The dotted lines indicate the width of the emission band of the light source used in the photoreactivity experiments.

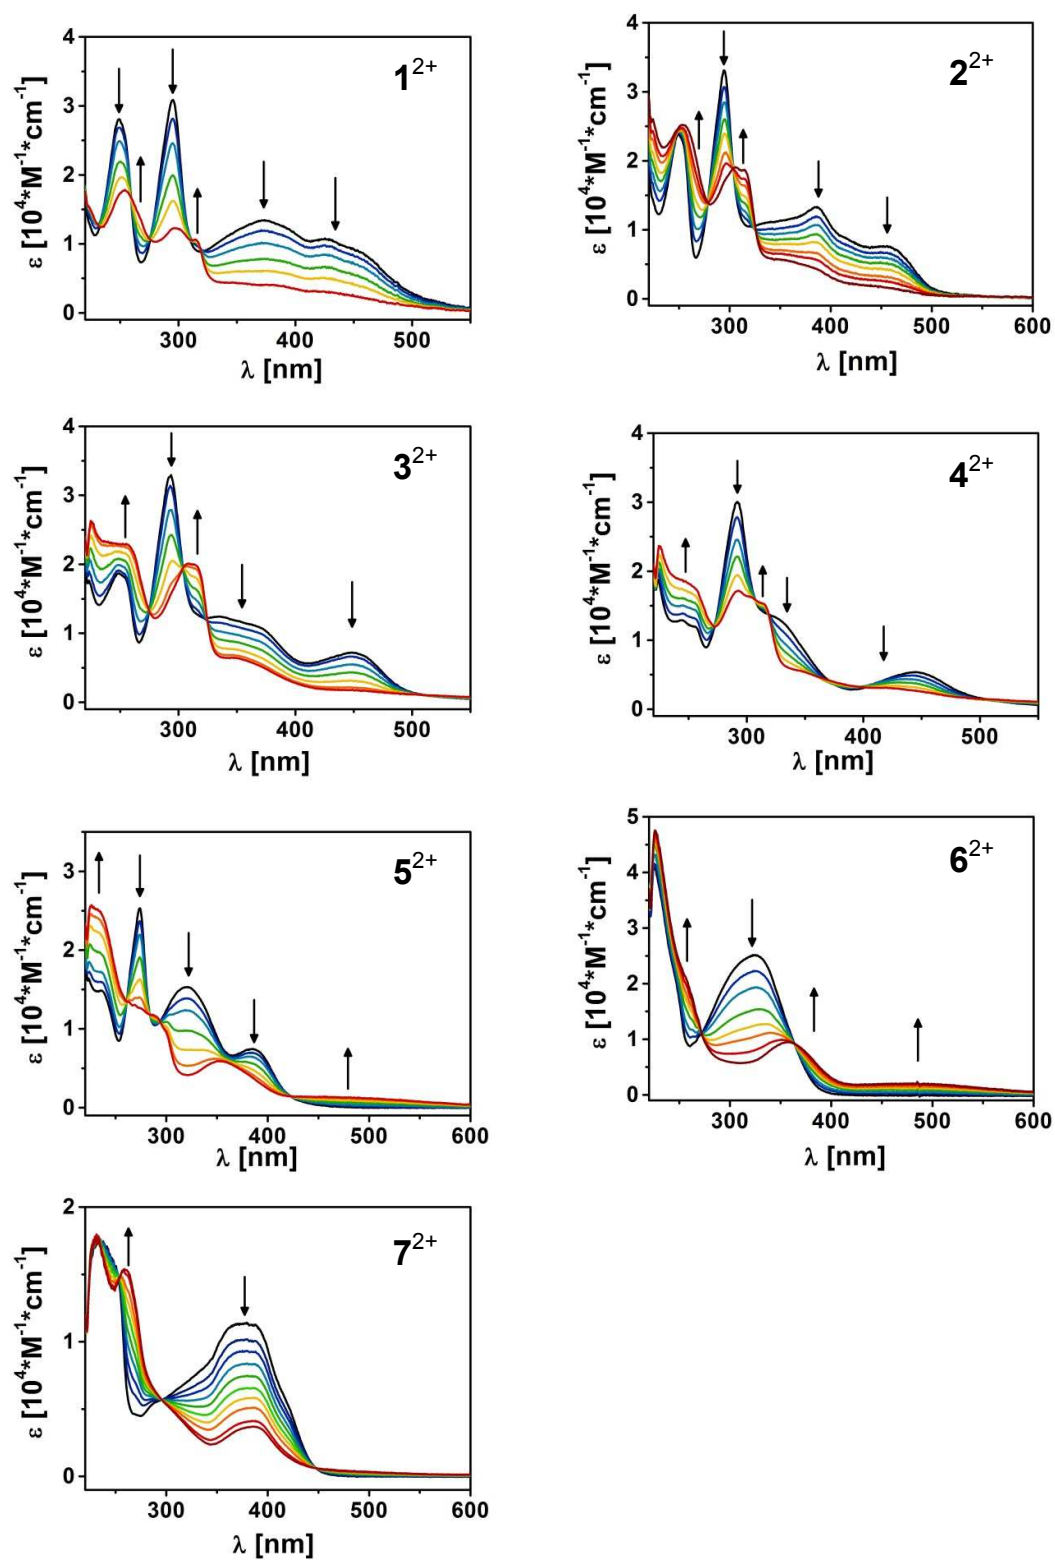

**Figure S46.** UV/Vis spectra recorded during the oxidation of complexes  $1^{2+}$ – $7^{2+}$  in DCM.

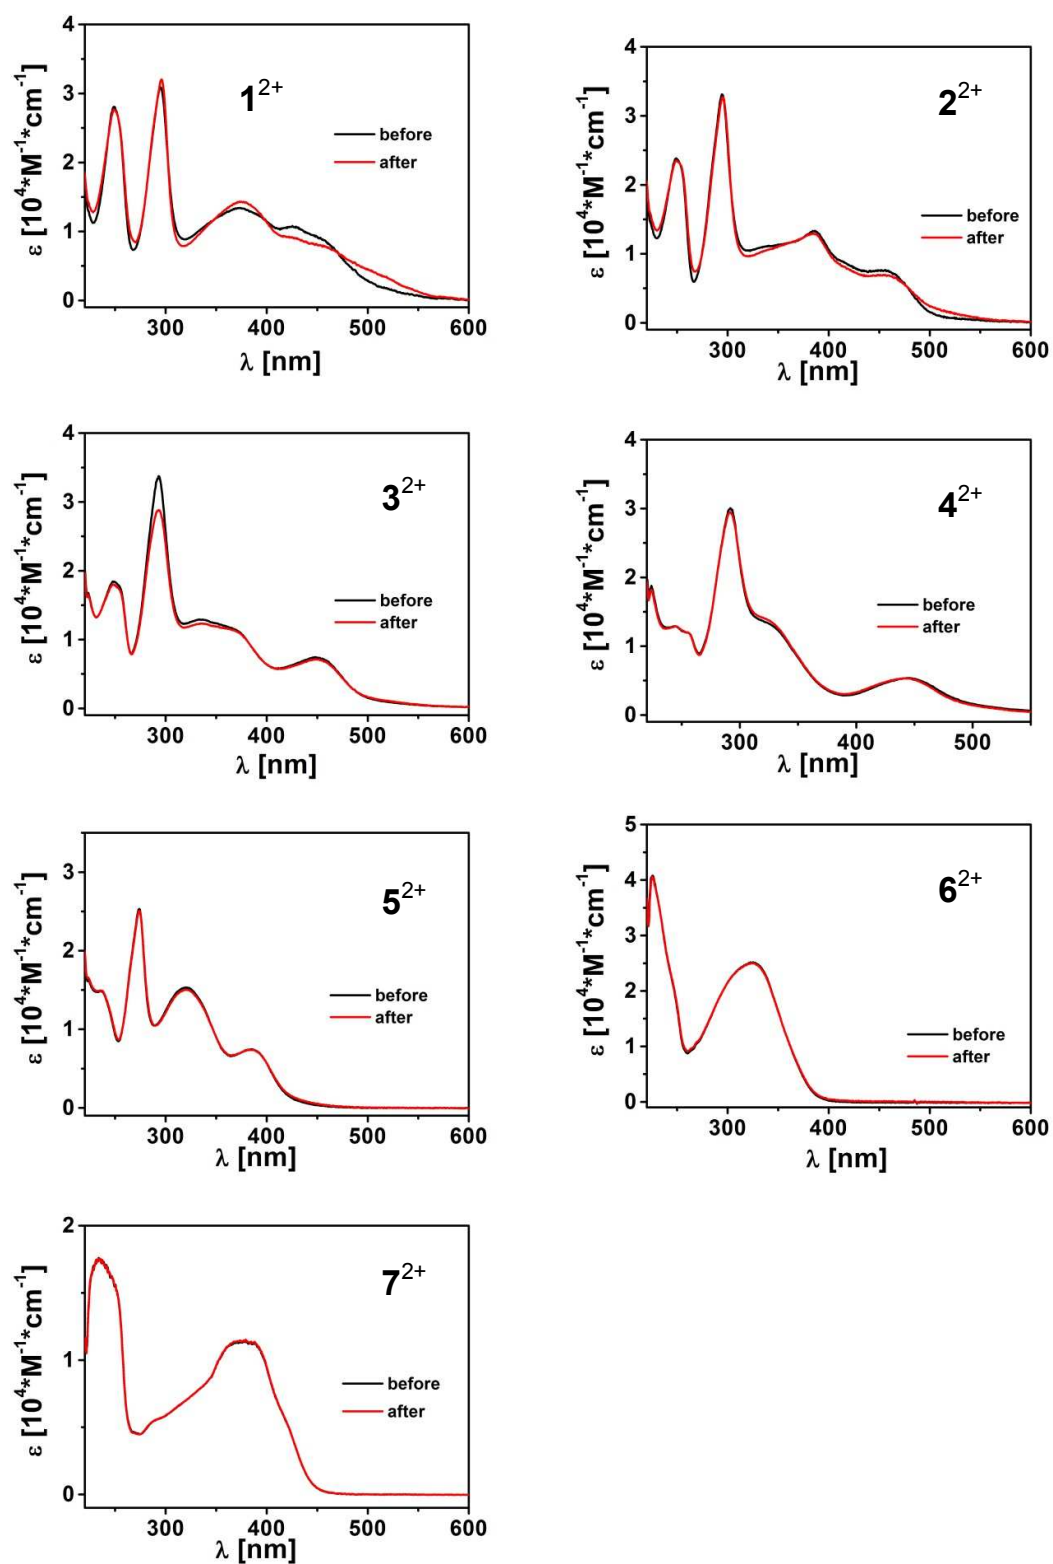

**Figure S47.** UV/Vis spectra recorded before and after the SEC of the oxidation process of complexes  $1^{2+}$ – $7^{2+}$  in DCM.



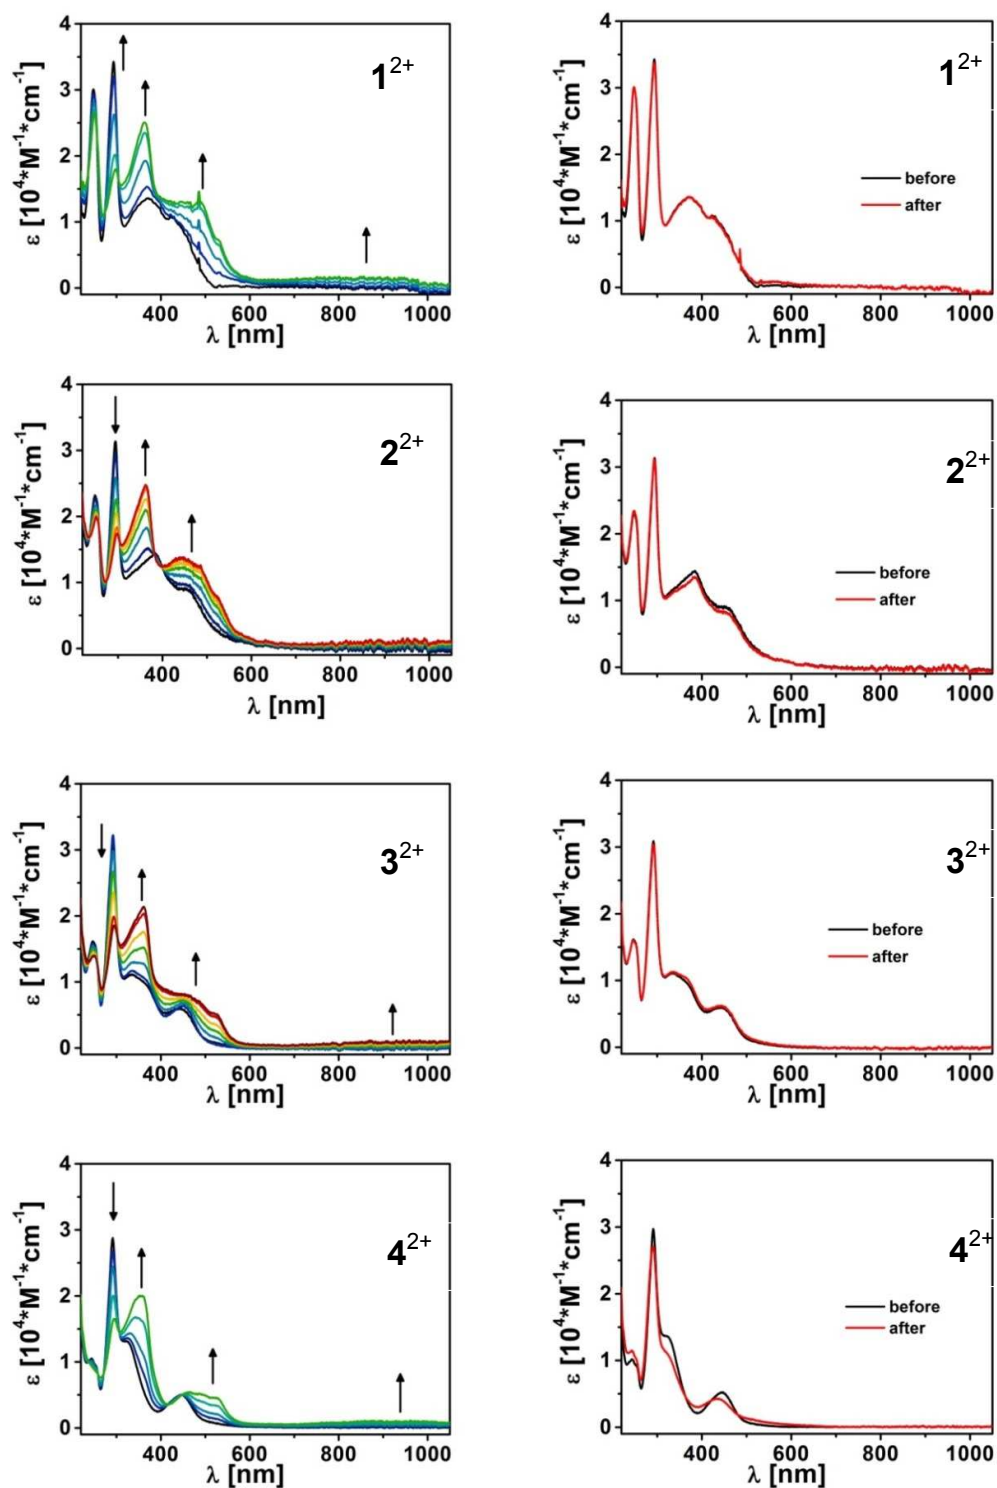

**Figure S48.** UV/Vis spectra (left) recorded during the reduction process of complexes  $1^{2+}$ – $4^{2+}$  in  $\text{CH}_3\text{CN}$ . On the right: comparison of the spectra taken before and after each SEC cycle.

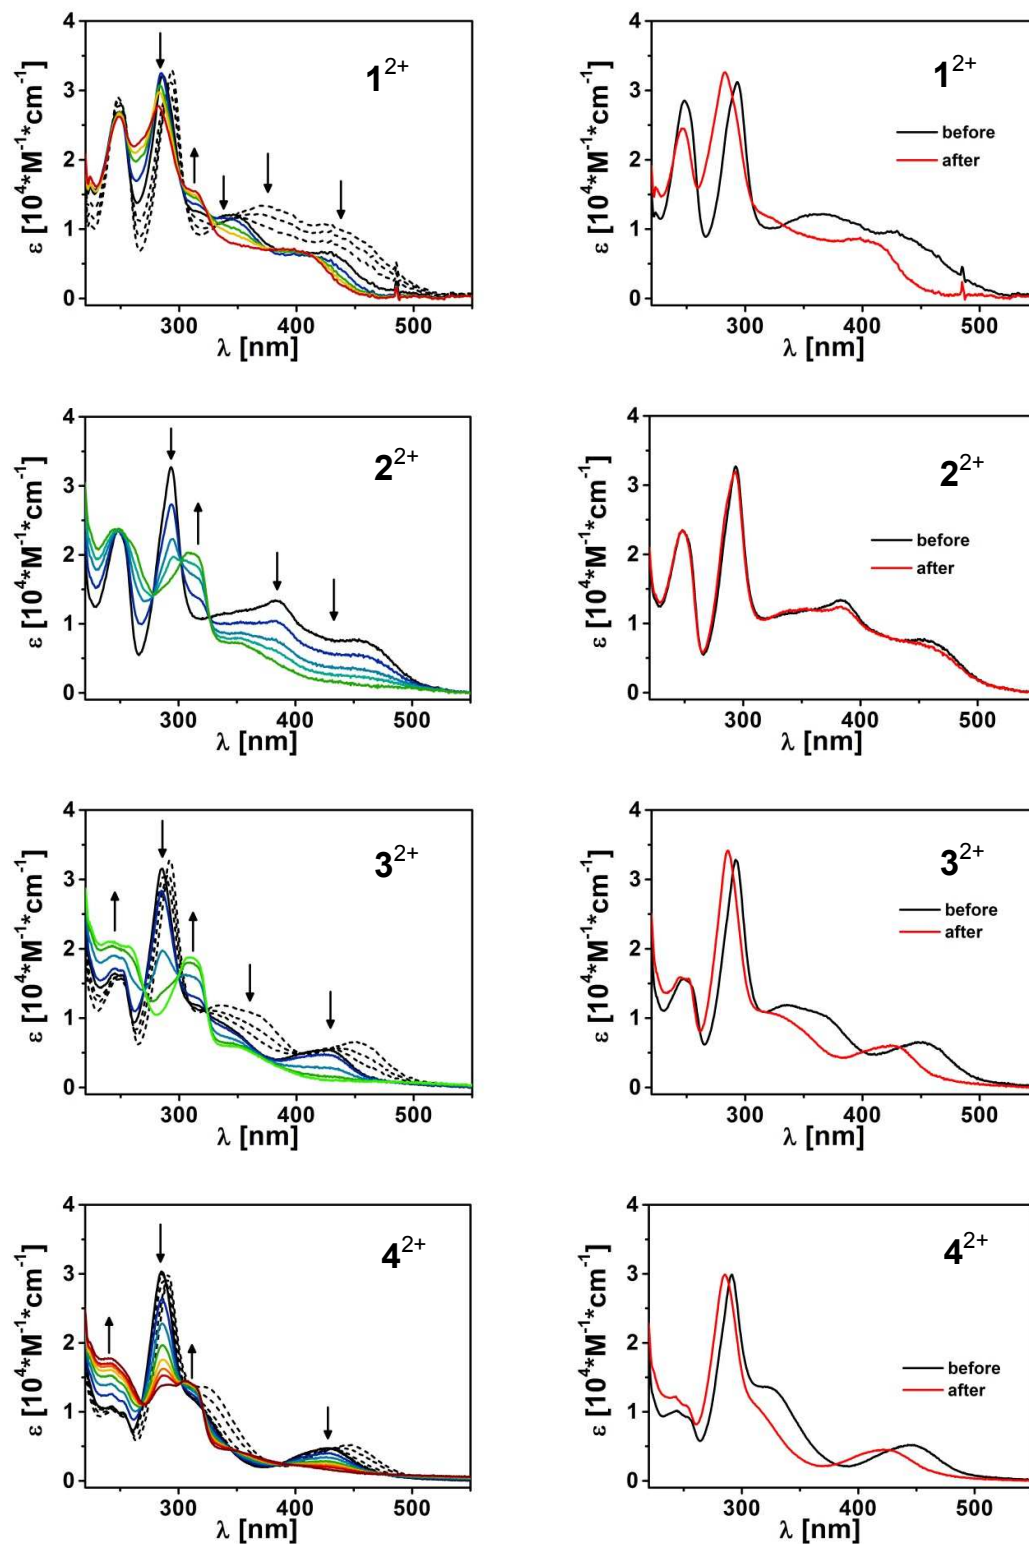

**Figure 49.** UV/Vis spectra recorded during the oxidation of complexes  $1^{2+}$ – $4^{2+}$  in  $\text{CH}_3\text{CN}$ . The spectral changes indicated by dotted lines are due to the redox reactivity described above (Scheme S6, Figure S33).



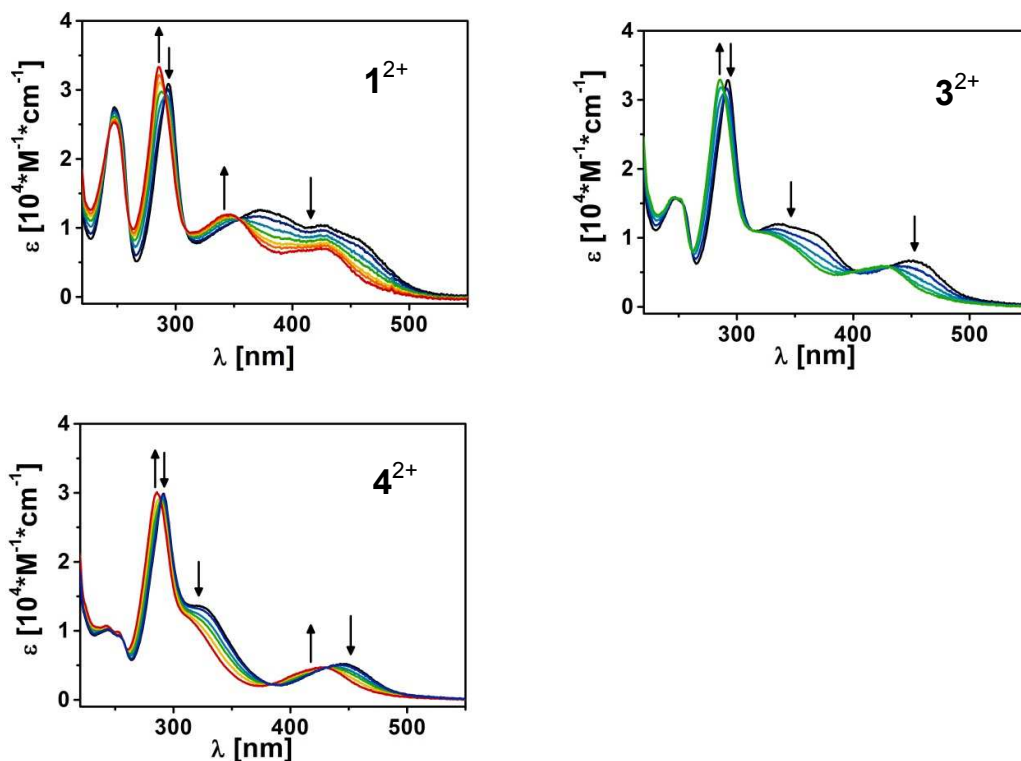

**Figure S50.** Changes in the UV/Vis spectra of  $1^{2+}$ ,  $3^{2+}$ , and  $4^{2+}$ , caused by the redox-triggered transformation of  $X^{2+}$  to  $[X(CH_3CN)]^{2+}$ .

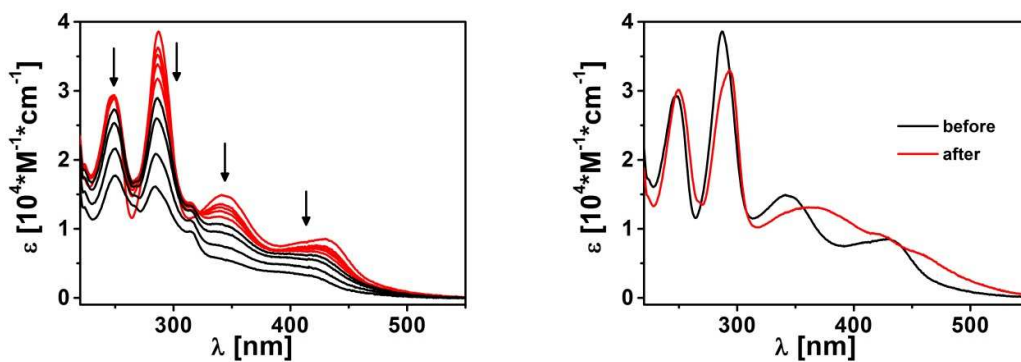

**Figure S51.** Left: changes in the UV/Vis spectrum (left) of  $[1(CH_3CN)]^{2+}$  upon oxidation in DCM; Initial spectral changes (red) have an isosbestic point. Right: comparison of the UV/Vis spectra measured before and after the SEC cycle shown on the left.

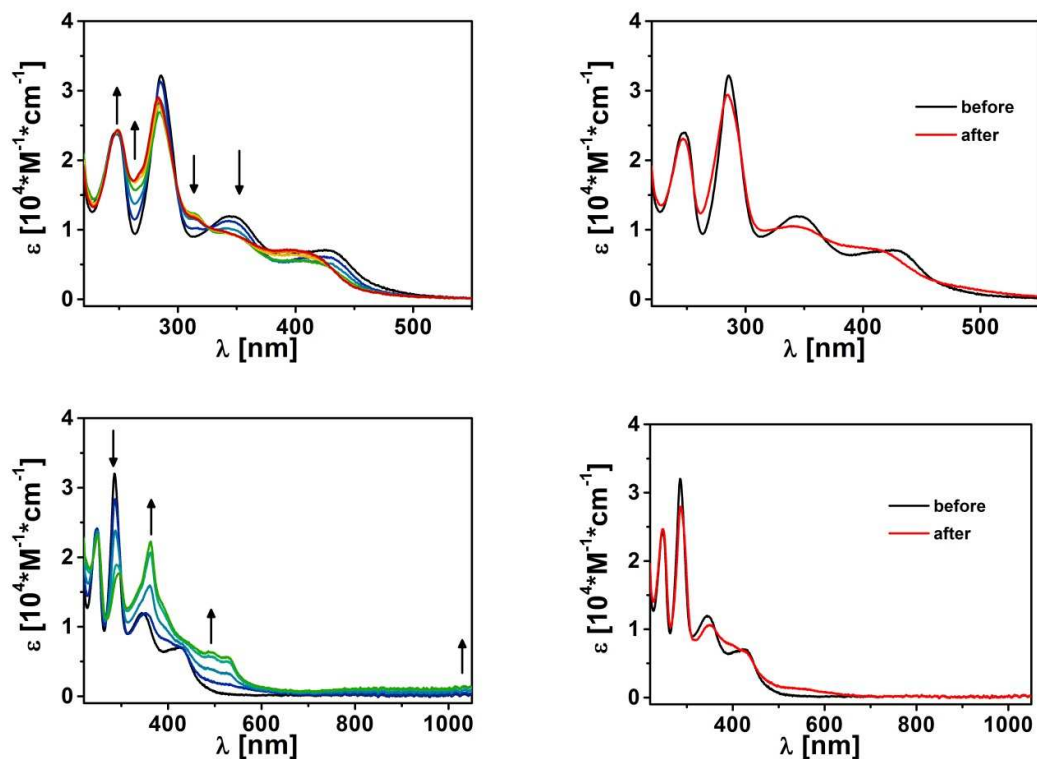

**Figure S52.** Left: changes in the UV/Vis spectrum of  $[1(\text{CH}_3\text{CN})]^{2+}$  upon oxidation (top left) and reduction (bottom left) in  $\text{CH}_3\text{CN}$ . Right: comparison of the UV/Vis spectra measured before and after the SEC cycles shown on the left.

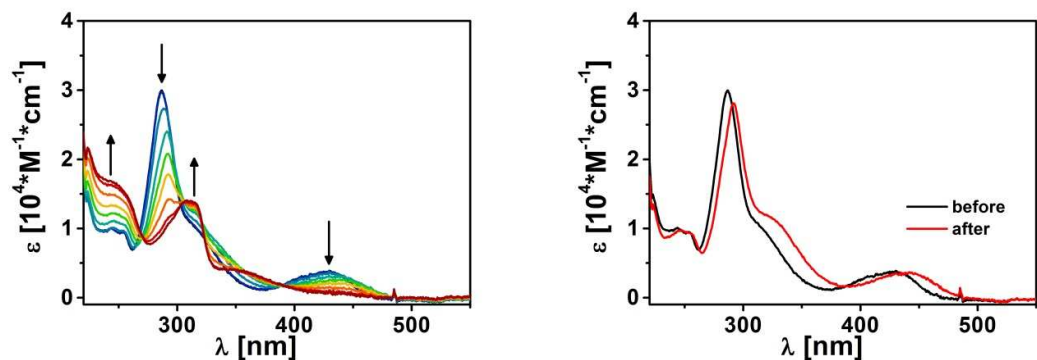

**Figure S53.** Left: changes in the UV/Vis spectrum (left) of  $[4(\text{CH}_3\text{CN})]^{2+}$  upon oxidation in DCM. Right: comparison of the UV/Vis spectra measured before and after the SEC cycle shown on the left.

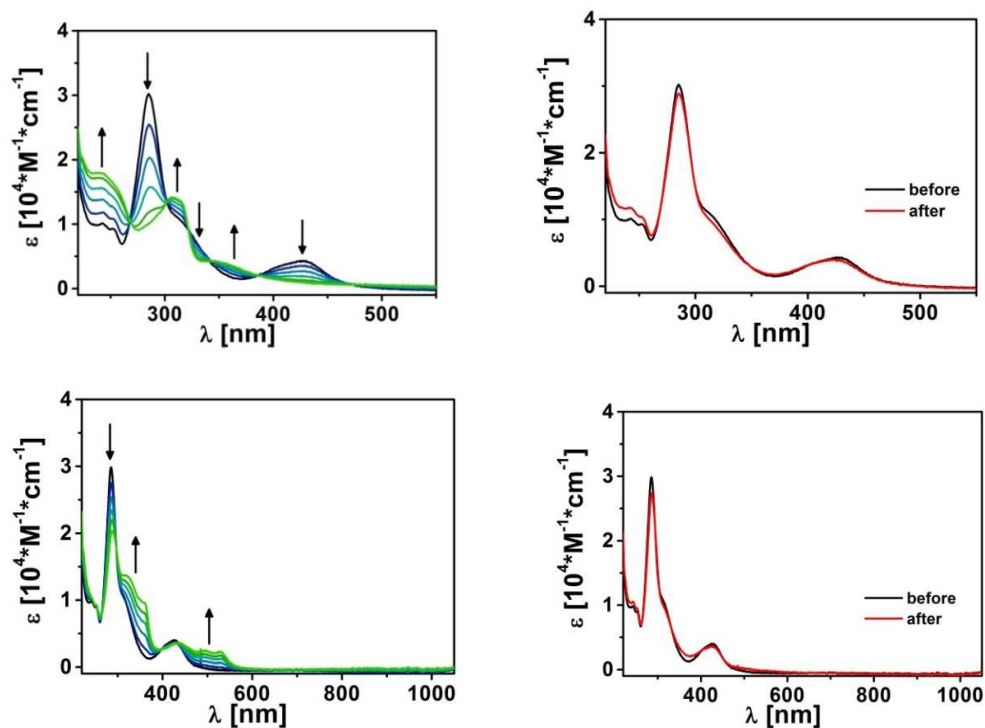

**Figure S54.** Left: changes in the UV/Vis spectrum of  $[4(\text{CH}_3\text{CN})]^{2+}$  upon oxidation (top left) and reduction (bottom left) in  $\text{CH}_3\text{CN}$ . Right: comparison of the UV/Vis spectra measured before and after the SEC cycles shown on the left.

**Table S5.** UV/Vis spectral data of the complexes  $1^{2+}$ – $8^{2+}$ , their acetonitrile adducts, and their reduced and oxidized forms. sh = shoulder, br = broad.

| Complex                                  | Bands: $\lambda$ [nm] ( $\epsilon$ [ $\text{M}^{-1} \text{cm}^{-1}$ ])                                         |
|------------------------------------------|----------------------------------------------------------------------------------------------------------------|
| $1^{2+}$ in DCM                          | 249 (28210), 295 (31010), 370 (13880), 425 (11930), 452 (10090) sh                                             |
| $2^{2+}$ in DCM                          | 249 (23760), 295 (33400), 337 (12050) sh, 384 (14370), 457 (8760)                                              |
| $3^{2+}$ in DCM                          | 250 (16140), 293 (33030), 334 (11690), 367 (10530) sh, 450 (6810)                                              |
| $4^{2+}$ in DCM                          | 245 (10830), 255 (10040) sh, 292 (29980), 326 (11800) sh, 446 (4920)                                           |
| $5^{2+}$ in DCM                          | 236 (13570), 274 (25460), 320 (15410), 386 (7630)                                                              |
| $6^{2+}$ in DCM                          | 233 (30630), 325 (25180)                                                                                       |
| $7^{2+}$ in DCM                          | 240 (18480), 286 (4670) sh, 378 (11400), 417 (5630) sh                                                         |
| $8^{2+}$ in DCM                          | 245 (36164), 291 (35556), 347 (23196), 441 (7010)                                                              |
| $[1(\text{CH}_3\text{CN})]^{2+}$ in MeCN | 247 (25259), 286 (33304), 347 (11938), 427 (6951)                                                              |
| $[3(\text{CH}_3\text{CN})]^{2+}$ in MeCN | 246 (15859), 252 (15588), 286 (32932), 326 (10633) sh, 424 (5960)                                              |
| $[4(\text{CH}_3\text{CN})]^{2+}$ in MeCN | 243 (10702), 252 (9868), 286 (30088), 316 (11513), 427 (4653)                                                  |
| $1^{3+}$ in DCM                          | 254 (17827), 297 (12259), 314 (10617), 378 (4021) sh, 427 (2934) sh                                            |
| $2^{3+}$ in DCM                          | 253 (25204), 305 (19092), 314 (18700), 354 (5641) sh, 386 (4355) sh, 441 (1902) sh                             |
| $3^{3+}$ in DCM                          | 255 (22969) sh, 308 (20088), 316 (19768) sh, 350 (6407) sh                                                     |
| $4^{3+}$ in DCM                          | 247 (18554) sh, 292 (17145), 303 (16309) sh, 314 (15277) sh, 348 (5435) sh, 424 (3055) sh                      |
| $5^{3+}$ in DCM                          | 233 (24989) sh, 290 (11574) sh, 352 (5876), 480 (1291) br                                                      |
| $6^{3+}$ in DCM                          | 258 (20203) sh, 357 (9471), 486 (2159) br                                                                      |
| $7^{3+}$ in DCM                          | 259 (15306), 308 (4687) sh, 371 (3441) sh, 386 (3659), 477 (424) sh                                            |
| $1^+$ in MeCN                            | 250 (26523), 298 (17968), 363 (25066), 488 (12906) sh, 854 (1644) br                                           |
| $2^+$ in MeCN                            | 251 (19929), 298 (17353), 363 (24743), 443 (13790), 489 (12002) sh, 527 (7447) sh, 990 (1492) br               |
| $3^+$ in MeCN                            | 249 (13883), 295 (18555), 361 (21374), 459 (7953) sh, 524 (5111) sh, 992 (1040) br                             |
| $4^+$ in MeCN                            | 295 (16536), 354 (19902), 464 (5366), 493 (5027) sh, 525 (4502) sh, 924 (1136) br                              |
| $[1(\text{CH}_3\text{CN})]^+$ in MeCN    | 248 (23106), 295 (17690), 362 (22173), 395 (12261) sh, 439 (7941) sh, 492 (6329), 529 (5635) sh, 984 (1448) br |
| $[4(\text{CH}_3\text{CN})]^+$ in MeCN    | 288 (20353), 321 (13569) sh, 358 (9639) sh, 435 (3591) sh, 495 (2341), 529 (2199), 964 (1040) br               |

## EPR Spectroelectrochemistry

The bpy-containing complexes  $1^{2+}$ – $4^{2+}$  could be reduced reversibly. The EPR spectra of  $1^+$ ,  $2^+$ ,  $3^+$ , and  $4^+$  were measured in DCM at room temperature, and they show isotropic signals with  $g$  values of 1.992, 1.993, 1.993, and 1.992, respectively. All signals show Ru satellites and are split into 5 lines, because the bpy-centered radicals couple with the spins of the two  $^{14}\text{N}$  nuclei ( $S = 1$ ) of the bidentate ligand. For  $2^+$ , the EPR spectrum could be simulated with  $g = 1.9925$ ,  $a(^{14}\text{N}) = 4.4$  G,  $a(^{14}\text{N}) = 3.4$  G, and  $a(^{99,101}\text{Ru}) = 3.8$  G (Figure S55).

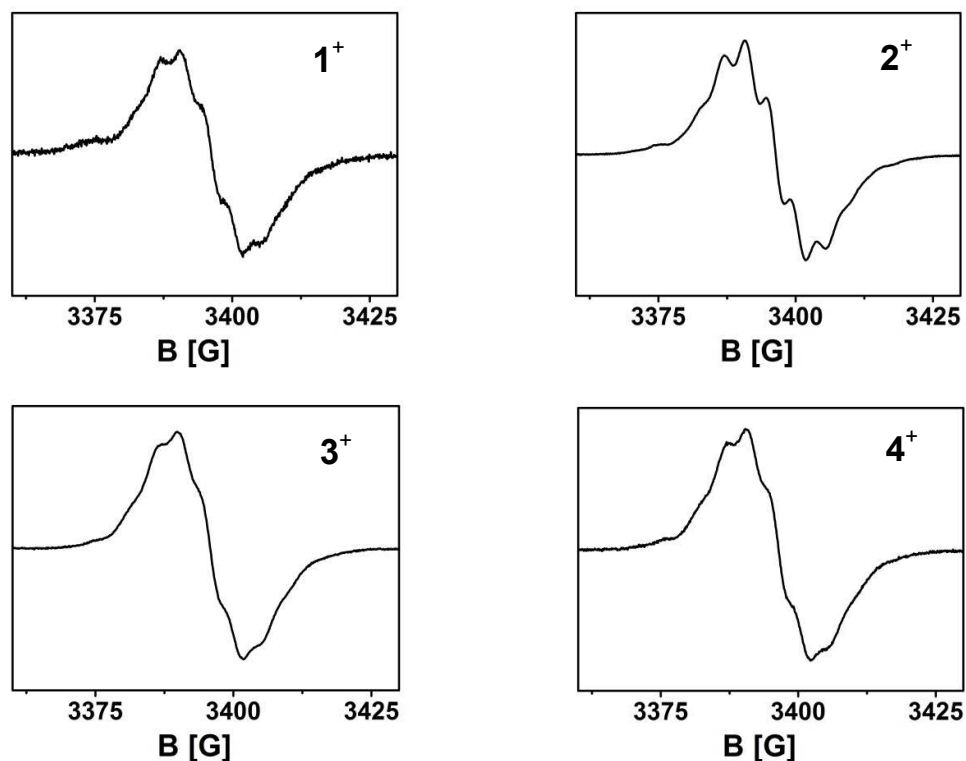

**Figure S55.** EPR spectra of  $1^+$ – $4^+$ , measured in DCM at room temperature.

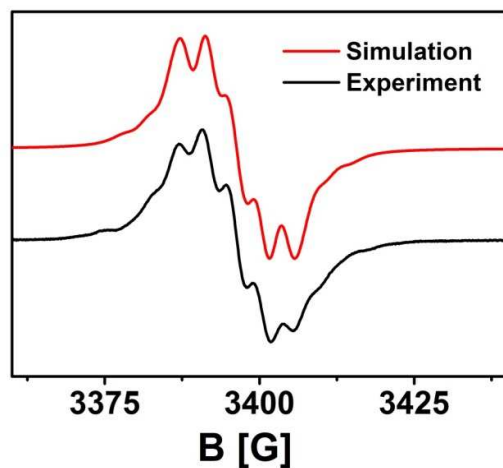

**Figure S56.** Comparison of the simulated and experimental EPR spectrum of  $2^+$  in DCM at room temperature.

## Thermo- and Photoreactivity

For assignment of the  $^1\text{H}$  NMR signals to the photoproducts see the  $^1\text{H}$  NMR section above.

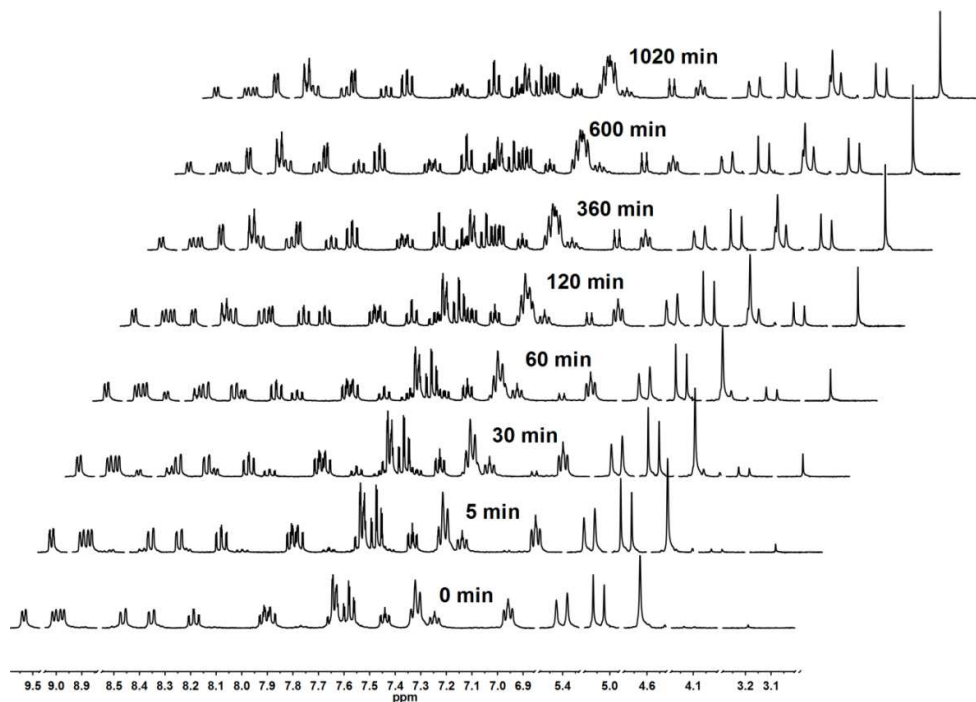

**Figure S57.** Changes in the  $^1\text{H}$  NMR spectrum of  $1^{2+}$  in  $\text{CD}_3\text{CN}$  upon irradiation (369 nm).

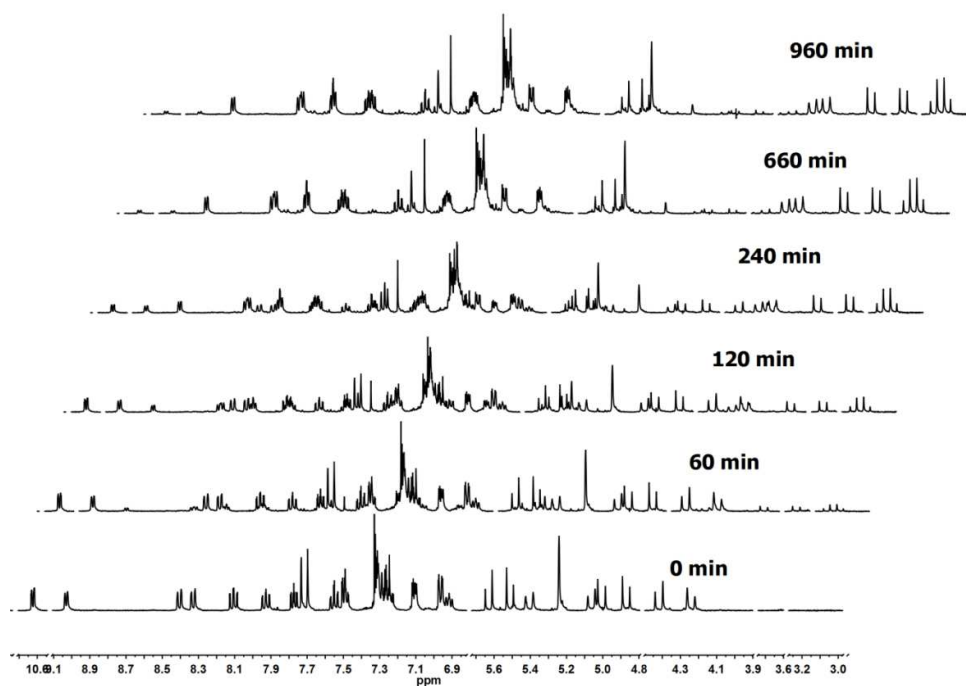

**Figure S58.** Changes in the  $^1\text{H}$  NMR spectrum of  $3^{2+}$  in  $\text{CD}_3\text{CN}$  upon irradiation (369 nm).

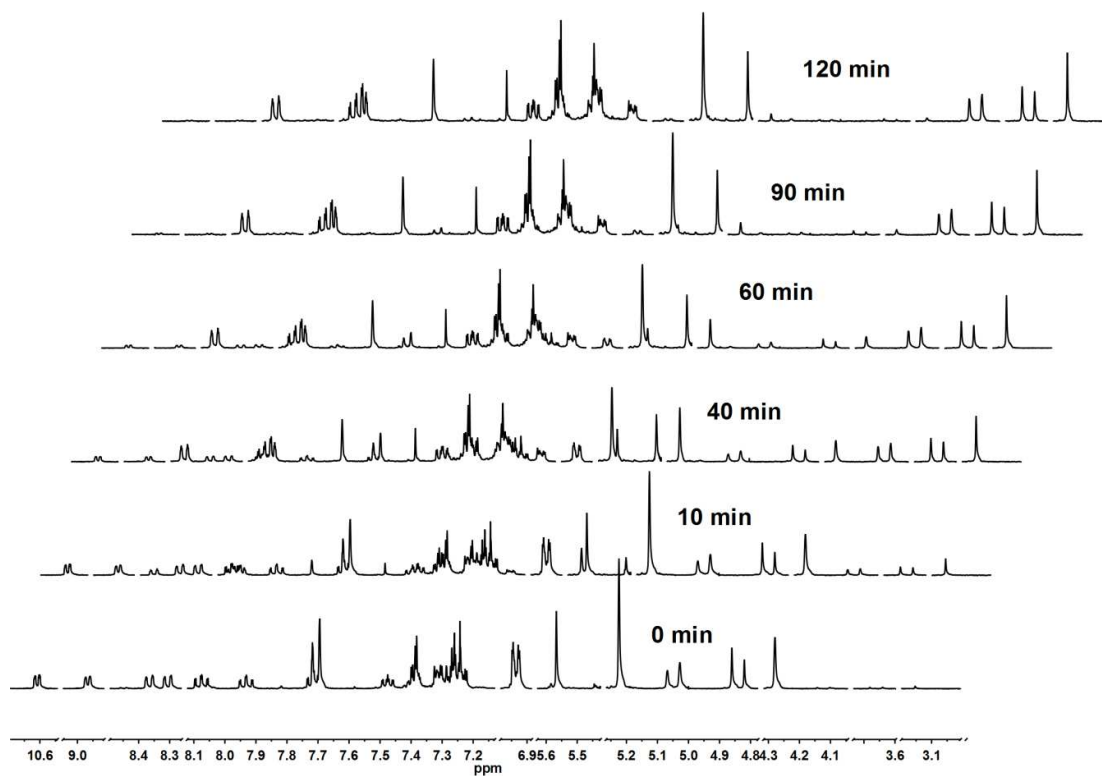

**Figure S59.** Changes in the  $^1\text{H}$  NMR spectrum of  $4^{2+}$  in  $\text{CD}_3\text{CN}$  upon irradiation (369 nm).

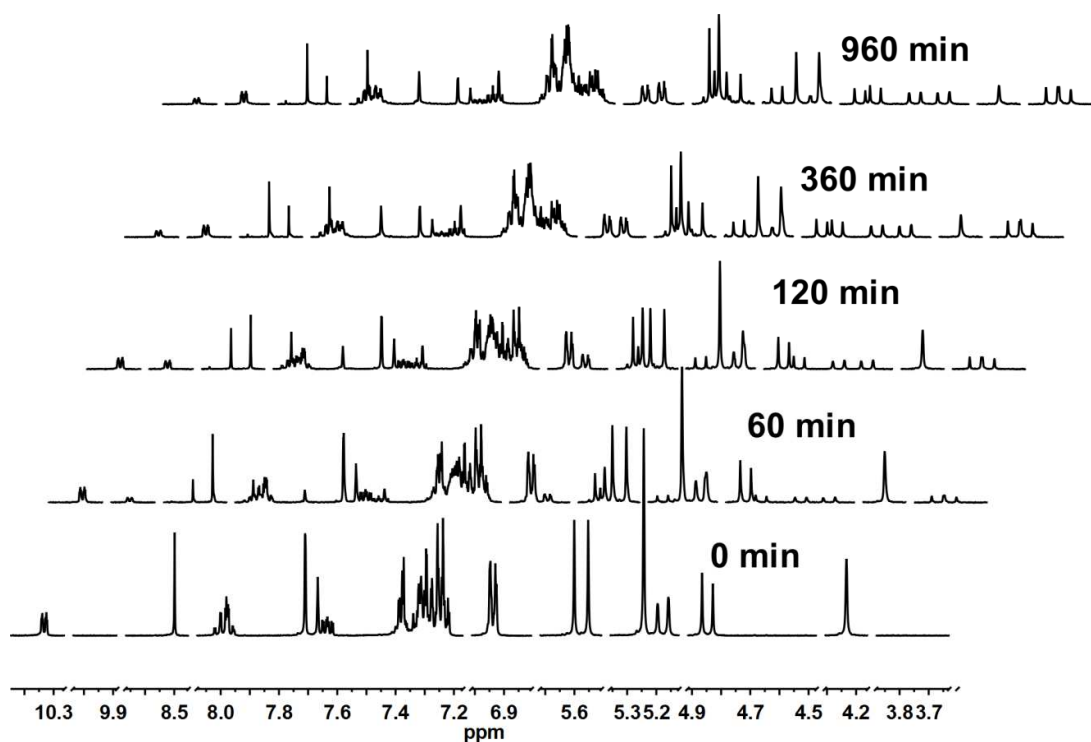

**Figure S60.** Changes in the  $^1\text{H}$  NMR spectrum of  $5^{2+}$  in  $\text{CD}_3\text{CN}$  upon irradiation (369 nm).

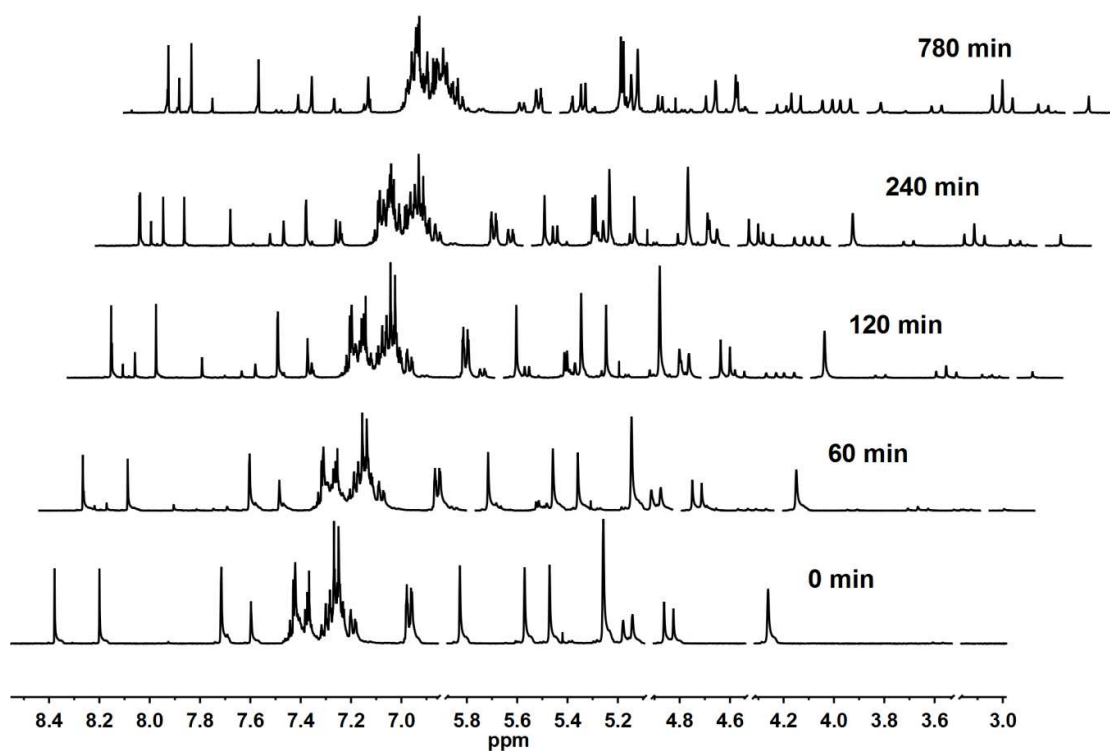

**Figure S61.** Changes in the  $^1\text{H}$  NMR spectrum of  $6^{2+}$  in  $\text{CD}_3\text{CN}$  upon irradiation (369 nm).

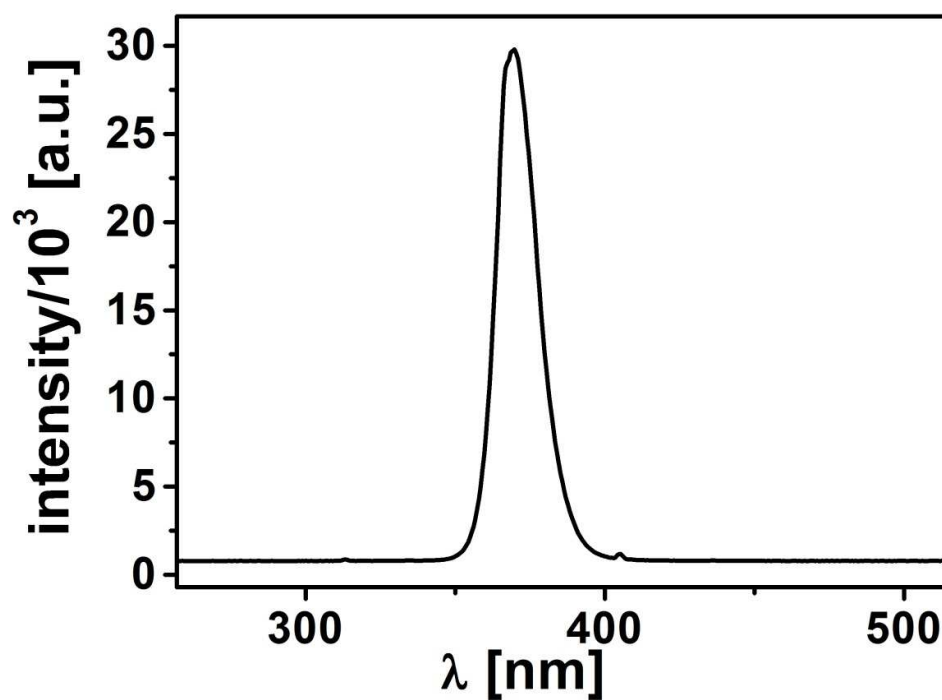

**Figure S62.** Emission profile of the light source used for the photoexperiments.

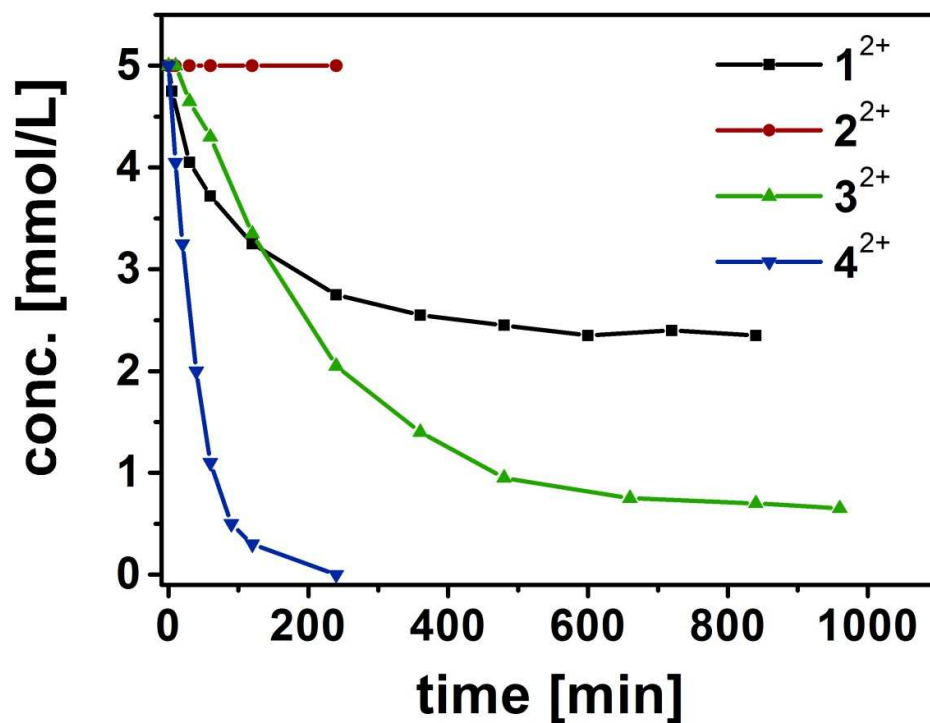

**Figure S63.** Change in concentration of  $X^{2+}$  (complexes  $1^{2+}$ – $4^{2+}$ ) over time upon irradiation (369 nm) in  $CD_3CN$ .

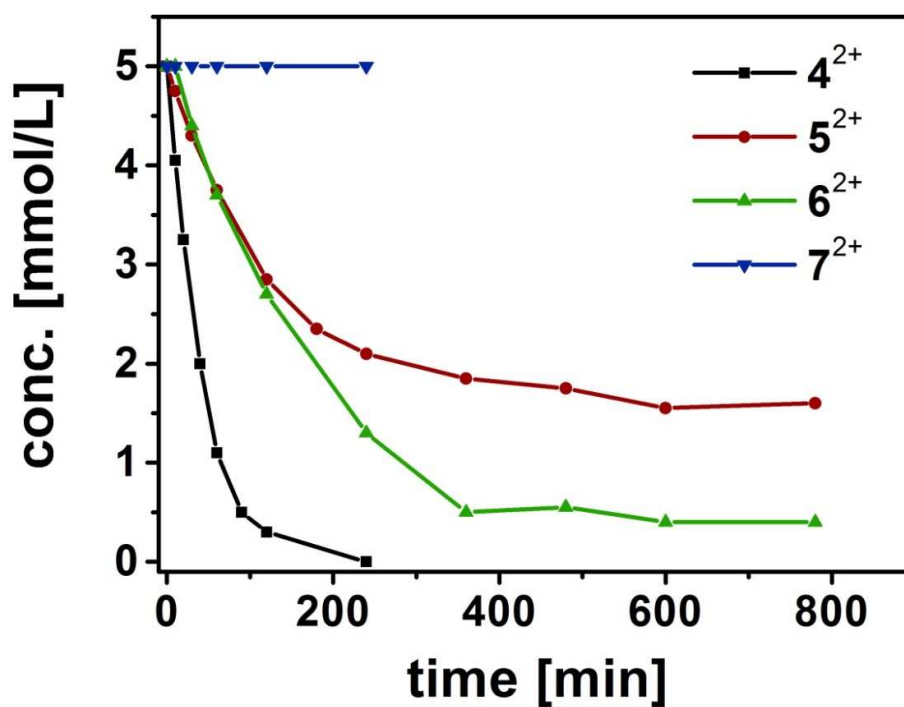

**Figure S64.** Change in concentration of  $X^{2+}$  (complexes  $4^{2+}$ – $7^{2+}$ ) over time upon irradiation (369 nm) in  $CD_3CN$ .



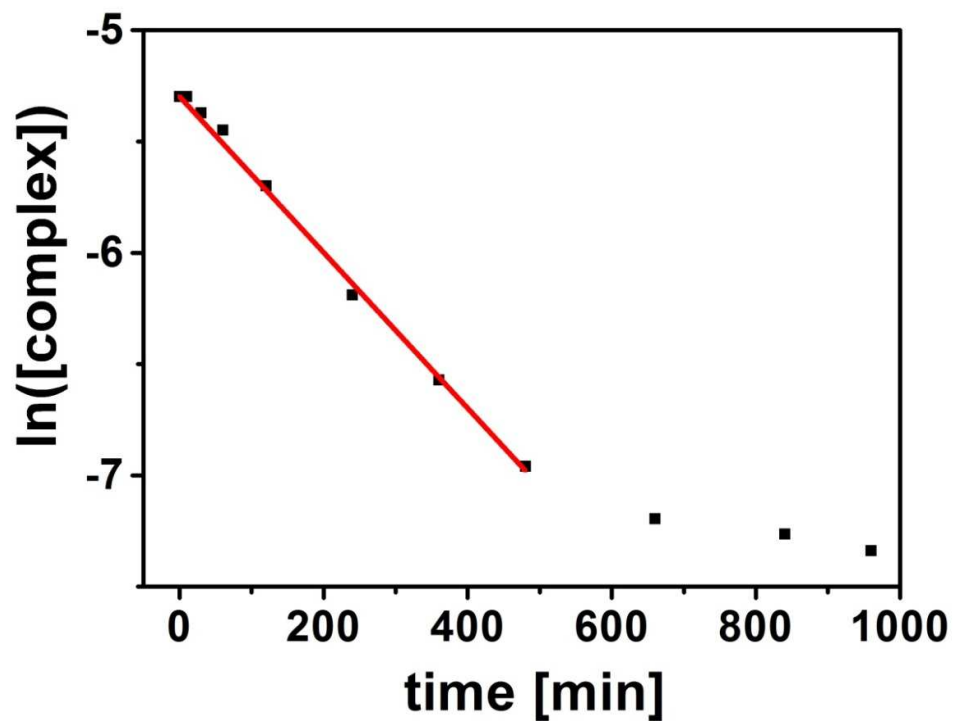

**Figure S65.** Logarithmic plot of the concentration of  $3^{2+}$  over time upon irradiation (369 nm) in  $CD_3CN$ . Initially, the transformation of  $3^{2+}$  follows first-order kinetics (linear fit, red).

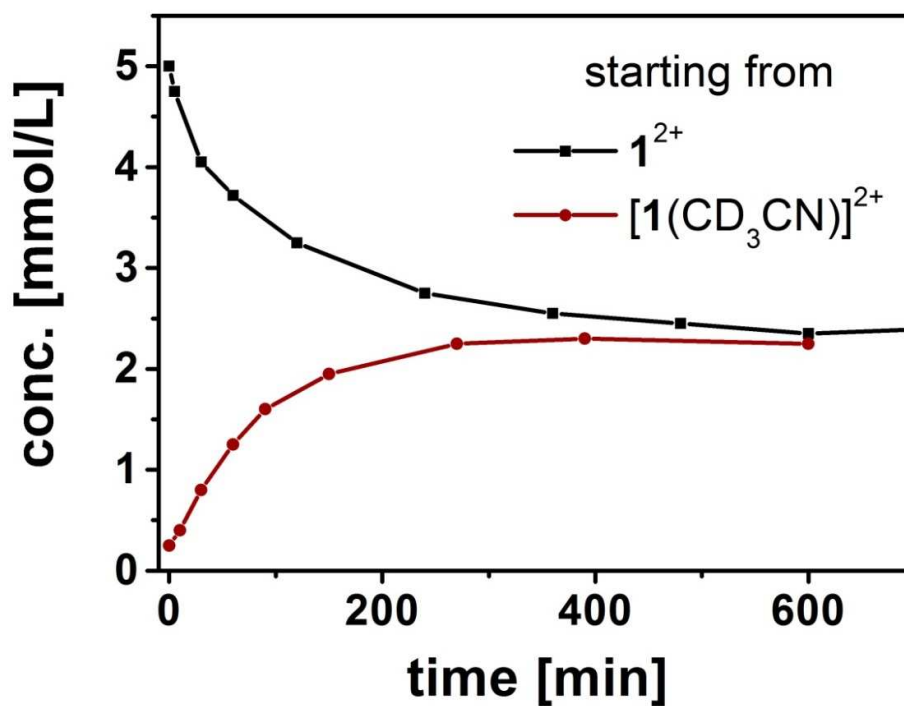

**Figure S66.** Comparison of the light-driven dissociation of  $1^{2+}$  and  $[1(CD_3CN)]^{2+}$  upon irradiation (369 nm) in  $CD_3CN$ .

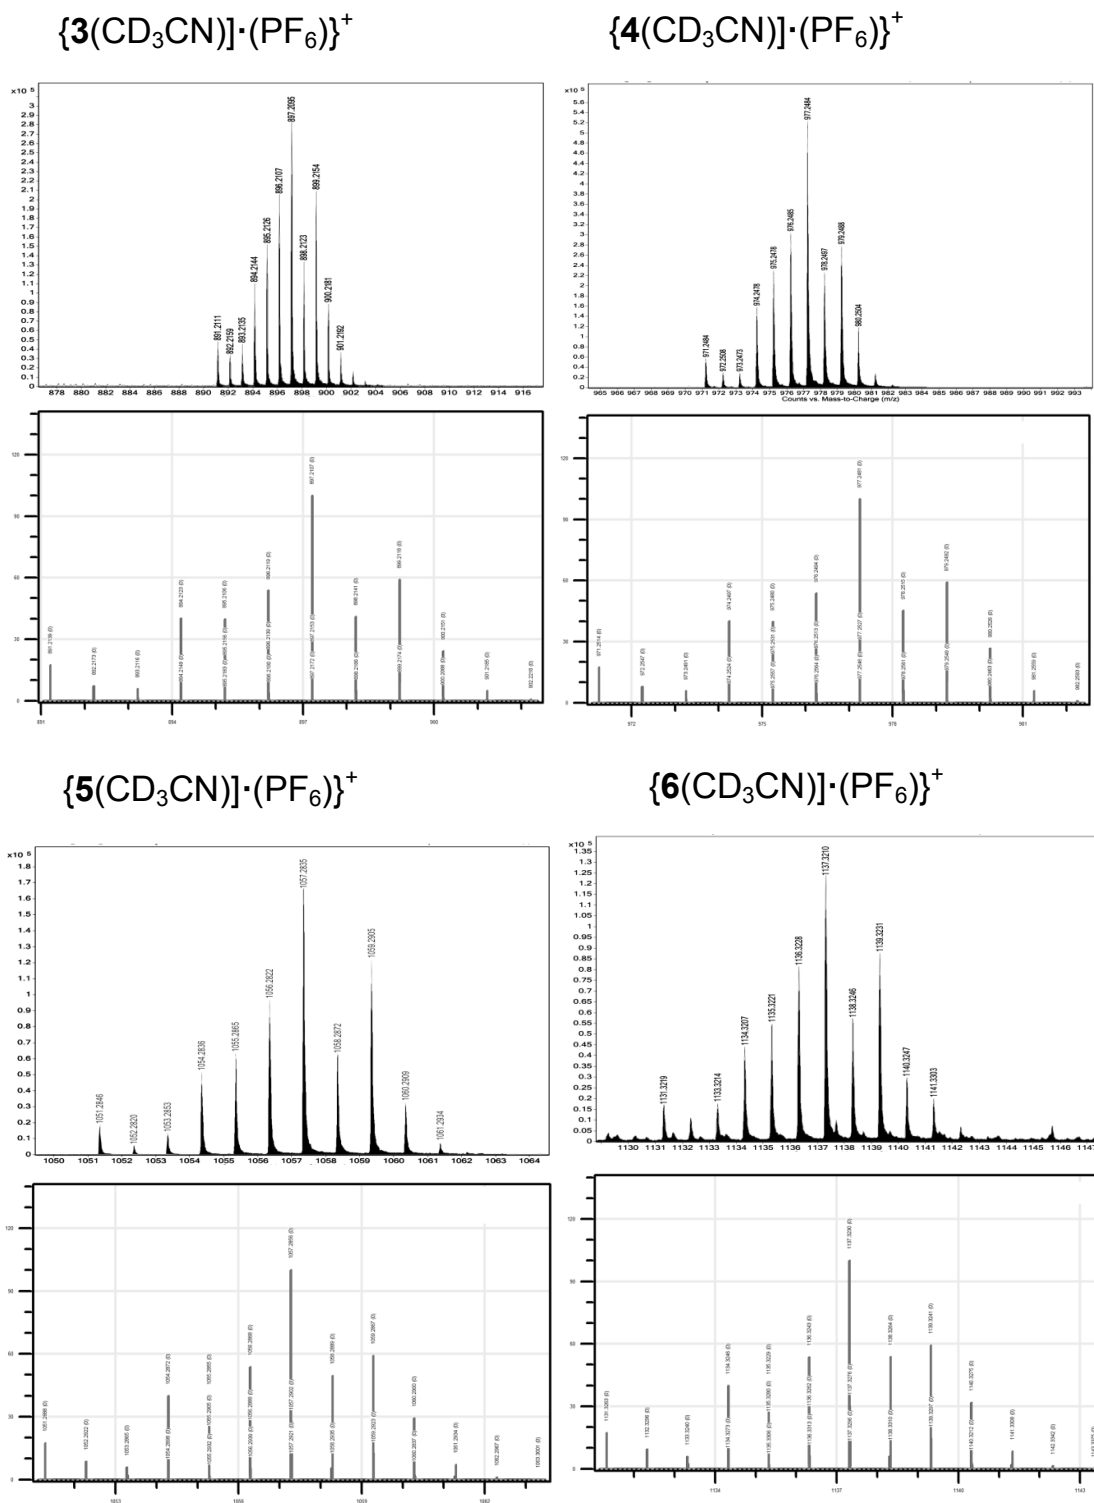

**Table S6.** Rate constants and quantum yields of the photoreactions of **1**<sup>2+</sup>–**7**<sup>2+</sup>.

| Complex                | Initial reaction rate <sup>a</sup><br>$k_{\text{init}} [10^{-3} \cdot \text{s}^{-1}]$ | Conversion efficiency <sup>a</sup> [%]<br>(time [min]) | Quantum yield <sup>b</sup> (350–400 nm)<br>$\phi_{350-400\text{nm}}$ | Quantum yield (monochromatic irradiation)<br>$\phi_{\lambda}$ |
|------------------------|---------------------------------------------------------------------------------------|--------------------------------------------------------|----------------------------------------------------------------------|---------------------------------------------------------------|
| <b>1</b> <sup>2+</sup> | 3.2                                                                                   | 53<br>(600)                                            | 0.0054                                                               | 0.0021<br>( $\lambda = 423 \text{ nm}$ ) <sup>4</sup>         |
| <b>2</b> <sup>2+</sup> | –                                                                                     | –                                                      | –                                                                    | –                                                             |
| <b>3</b> <sup>2+</sup> | 3.6                                                                                   | 87<br>(960)                                            | 0.0081                                                               | –                                                             |
| <b>4</b> <sup>2+</sup> | 24.2                                                                                  | 99<br>(240)                                            | 0.0360                                                               | 0.0604<br>( $\lambda = 436 \text{ nm}$ ) <sup>c</sup>         |
| <b>5</b> <sup>2+</sup> | 4.4                                                                                   | 70<br>(600)                                            | –                                                                    | –                                                             |
| <b>6</b> <sup>2+</sup> | 5.5                                                                                   | 92<br>(600)                                            | –                                                                    | –                                                             |
| <b>7</b> <sup>2+</sup> | –                                                                                     | –                                                      | –                                                                    | –                                                             |

(a) Measured with 5 mmol/L samples (100 % absorbance) in NMR tubes with broad-band irradiation (350–400 nm, Figure S62). (b) Determined by using a ferrioxalat actinometer. Samples of **1**<sup>2+</sup> ( $3.2 \cdot 10^{-5} \text{ mol/L}$ ), **3**<sup>2+</sup> ( $6.7 \cdot 10^{-5} \text{ mol/L}$ ), and **4**<sup>2+</sup> ( $7.4 \cdot 10^{-5} \text{ mol/L}$ ) absorbed 66, 78, and 48 %, respectively, of the light between 350 and 400 nm. (c) Determined by using a ferrioxalat actinometer and monochromated light (spectrofluorimeter source) at 436 nm, where the sample of **4**<sup>2+</sup> ( $6.3 \cdot 10^{-5} \text{ mol/L}$ ) absorbed 46 % of the light.

## Mechanism of the Photoreaction

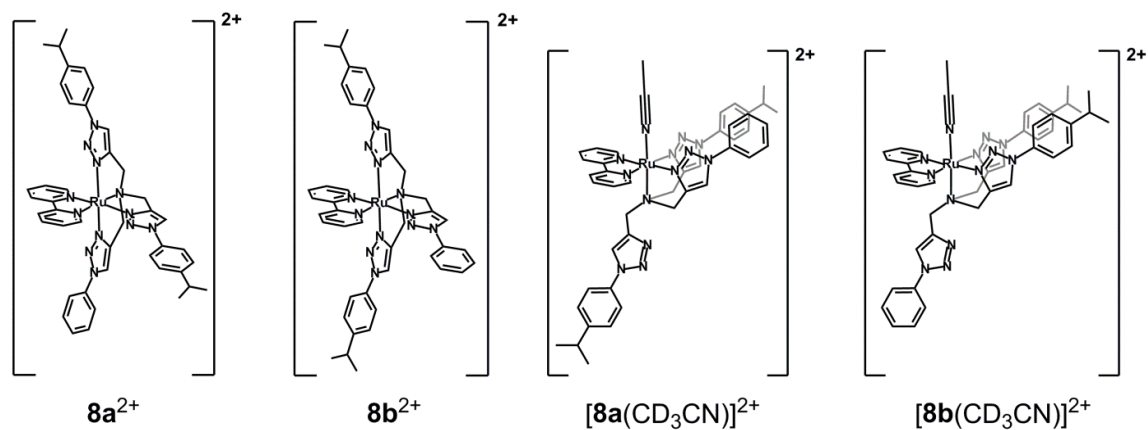

**Scheme S7.** Isomers of complex  $8^{2+}$  and of its acetonitrile adduct  $[8(CD_3CN)]^{2+}$ .

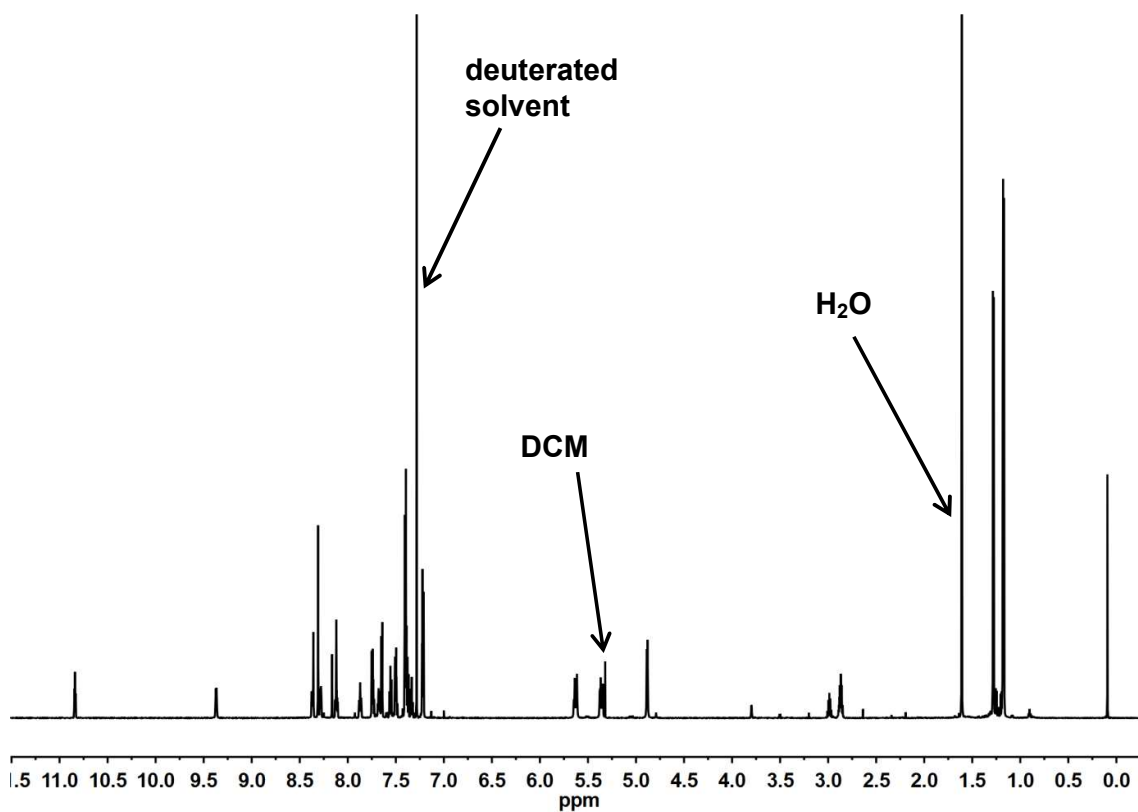

**Figure S68.** Full  $^1H$  NMR spectrum (700 MHz,  $CD_3Cl$ ) of  $8^{2+}$ . Solvent impurities are indicated.

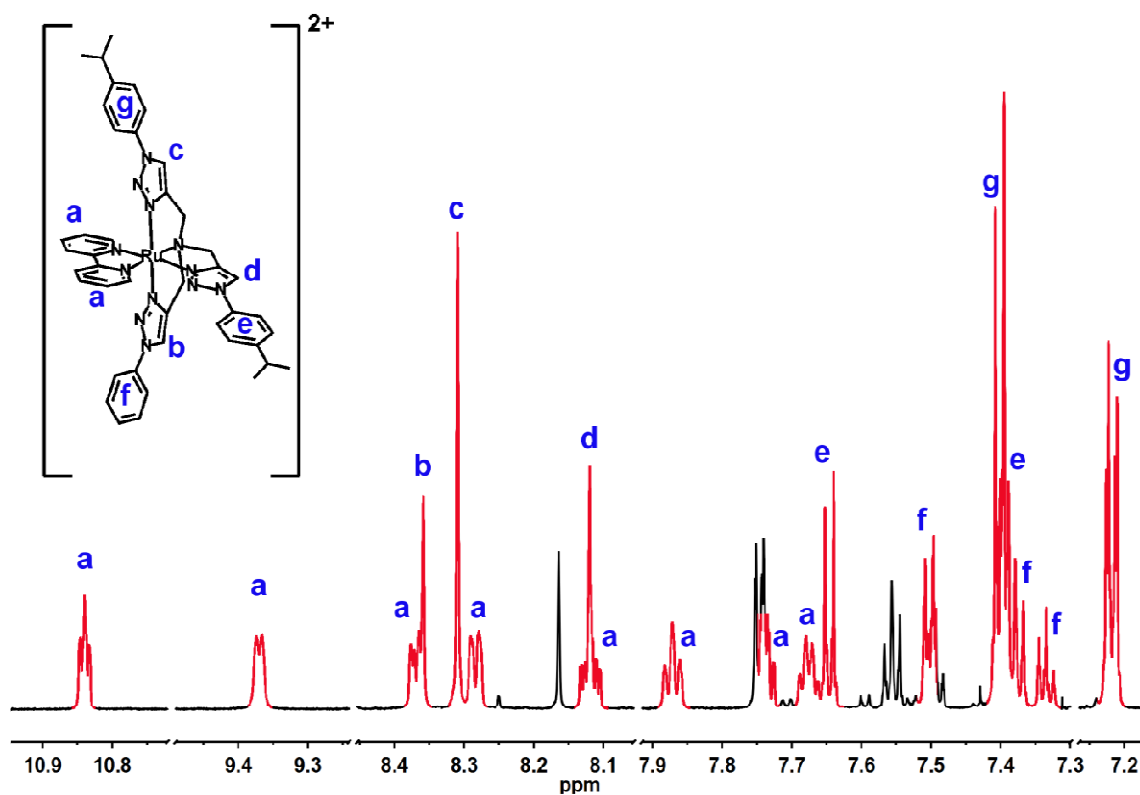

**Figure S69.**  $^1\text{H}$  NMR resonances (700 MHz,  $\text{CDCl}_3$ ) of  $8\text{a}^{2+}$  (aromatic region).

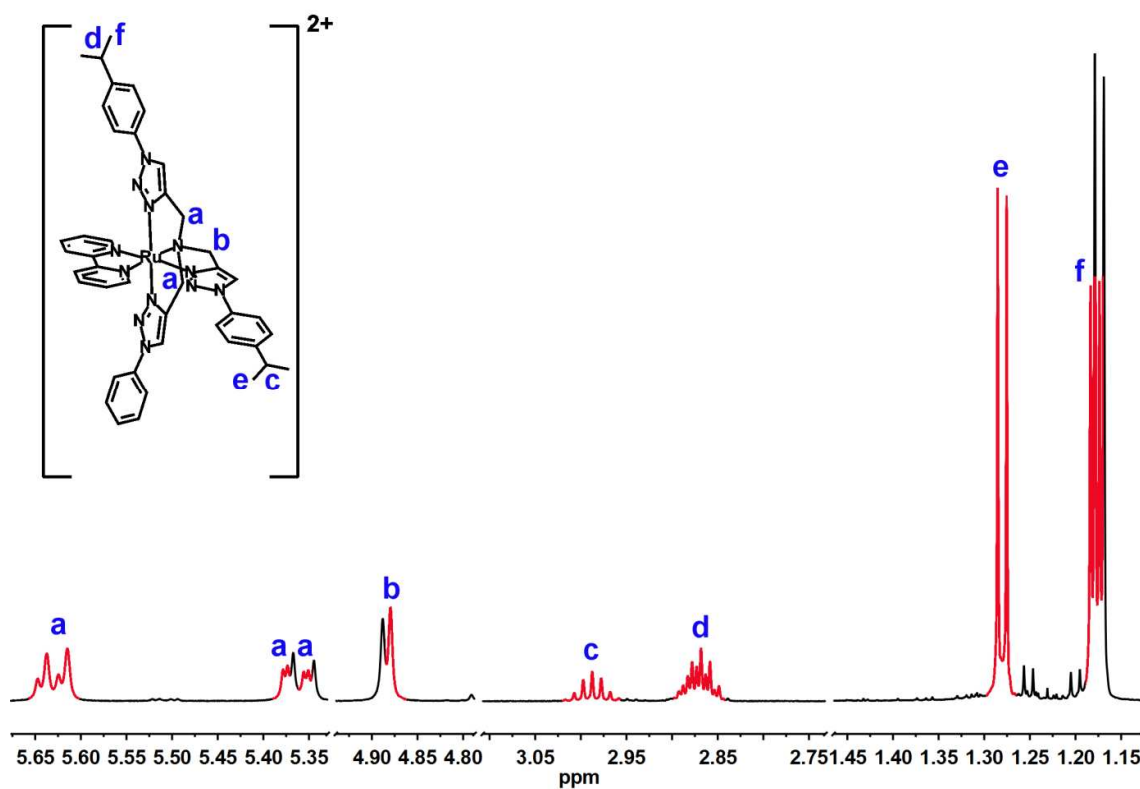

**Figure S70.**  $^1\text{H}$  NMR resonances (700 MHz,  $\text{CDCl}_3$ ) of  $8\text{a}^{2+}$  (aliphatic region).

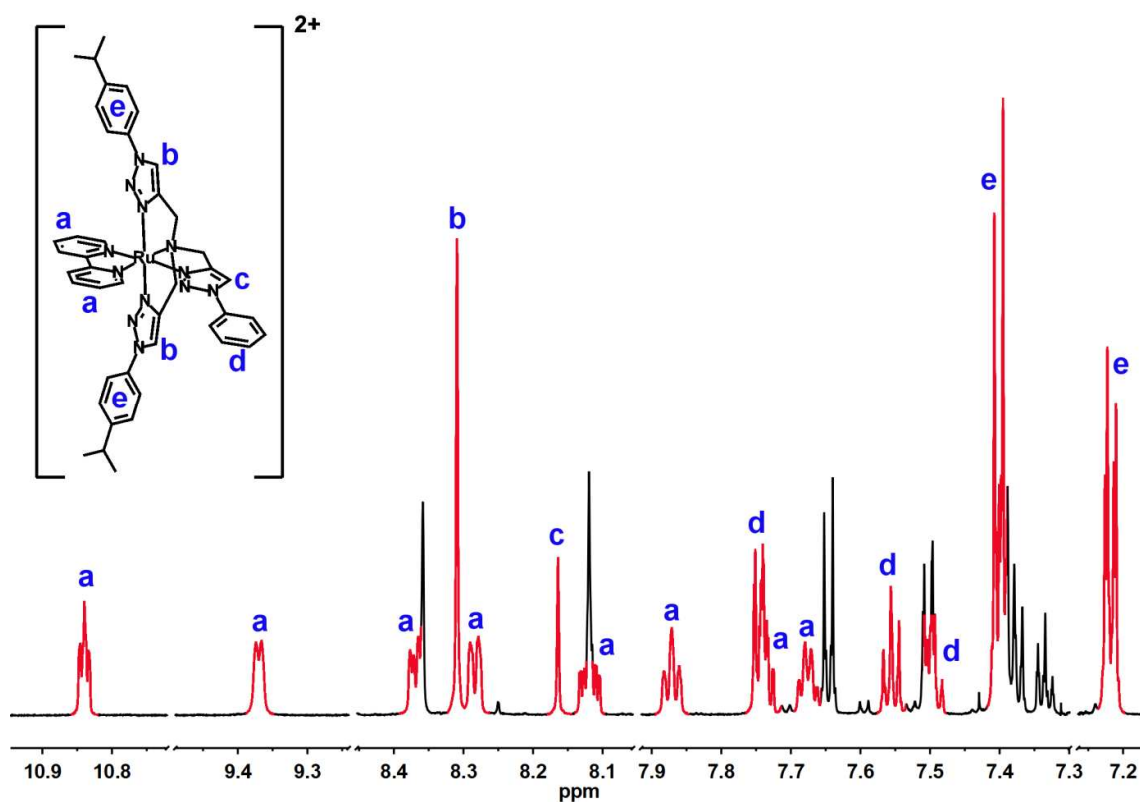

**Figure S71.**  $^1\text{H}$  NMR resonances (700 MHz,  $\text{CDCl}_3$ ) of  $8\text{b}^{2+}$  (aromatic region).

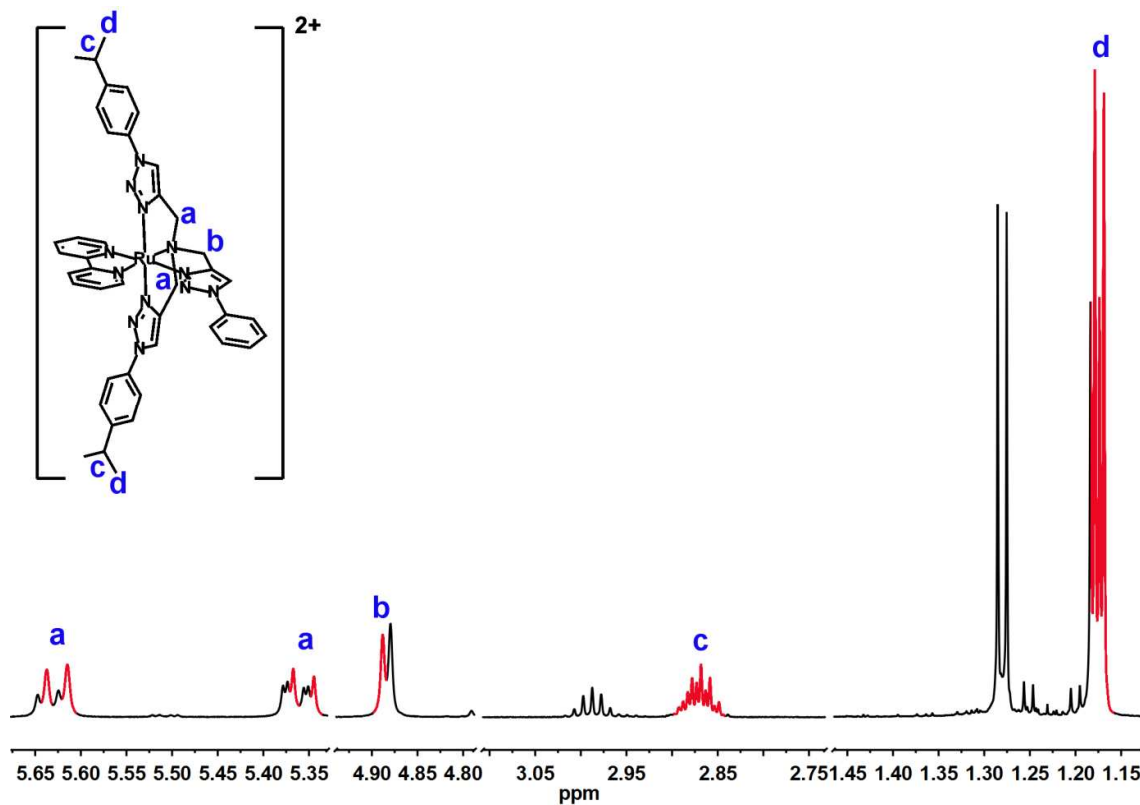

**Figure S72.**  $^1\text{H}$  NMR resonances (700 MHz,  $\text{CDCl}_3$ ) of  $8\text{b}^{2+}$  (aliphatic region).

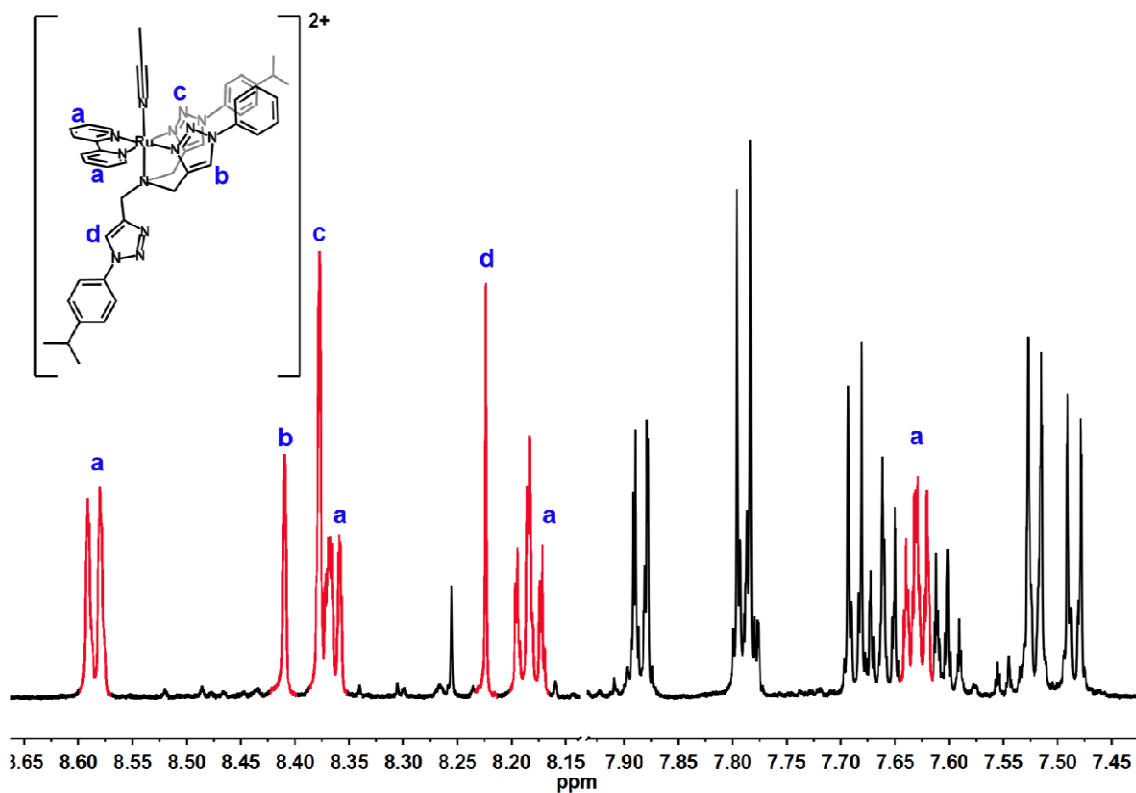

**Figure S73.**  $^1\text{H}$  NMR resonances (700 MHz,  $\text{CD}_3\text{CN}$ ) of  $[\mathbf{8a}(\text{CD}_3\text{CN})]^{2+}$  (aromatic region).

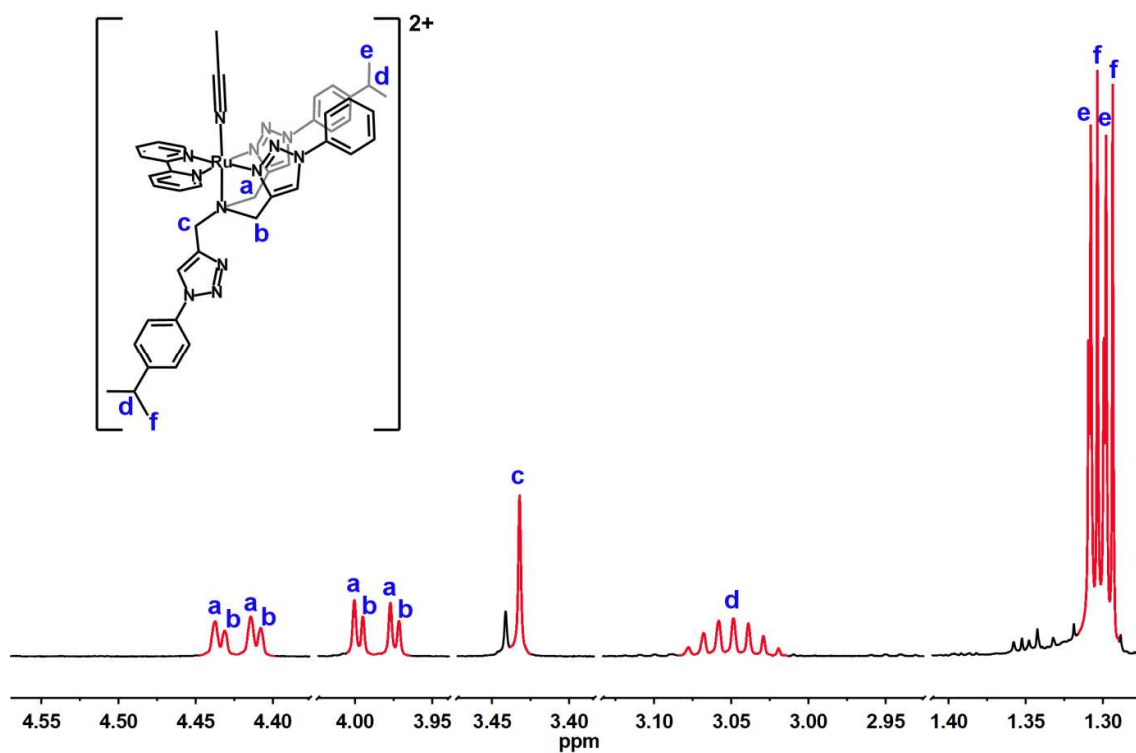

**Figure S74.**  $^1\text{H}$  NMR resonances (700 MHz,  $\text{CD}_3\text{CN}$ ) of  $[\mathbf{8a}(\text{CD}_3\text{CN})]^{2+}$  (aliphatic region).

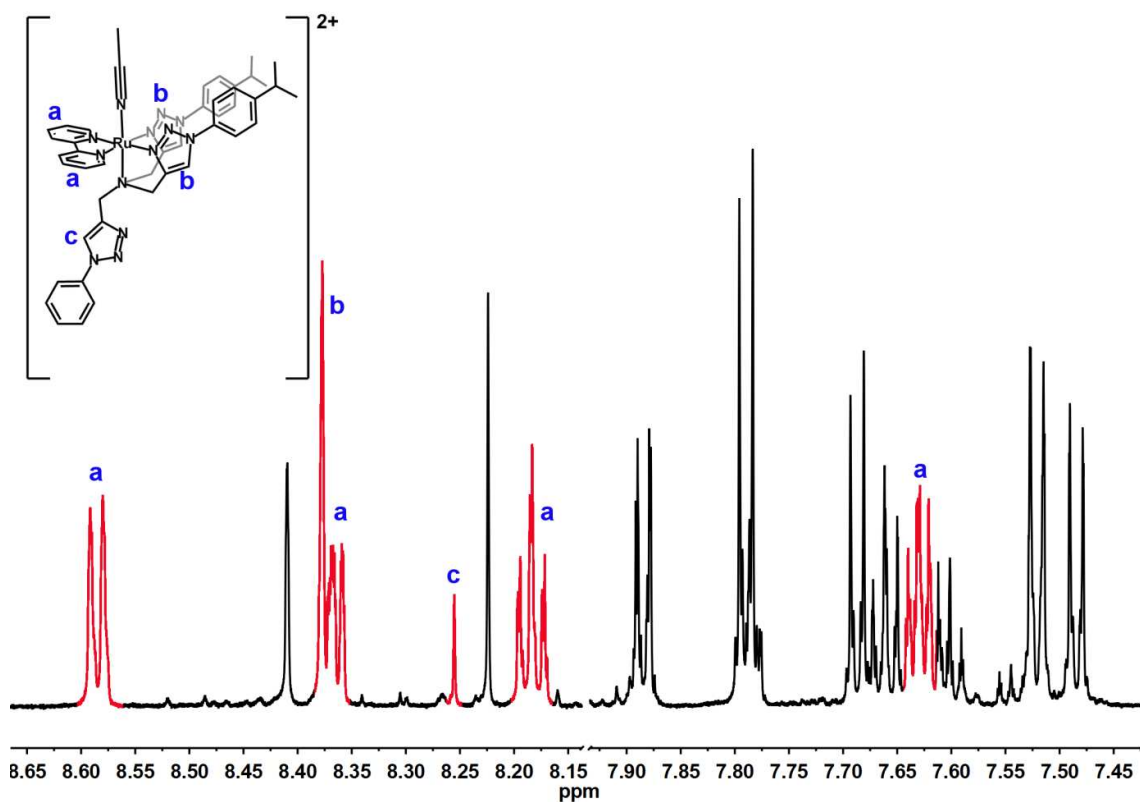

**Figure S75.**  $^1\text{H}$  NMR resonances (700 MHz,  $\text{CD}_3\text{CN}$ ) of  $[\mathbf{8b}(\text{CD}_3\text{CN})]^{2+}$  (aromatic region).

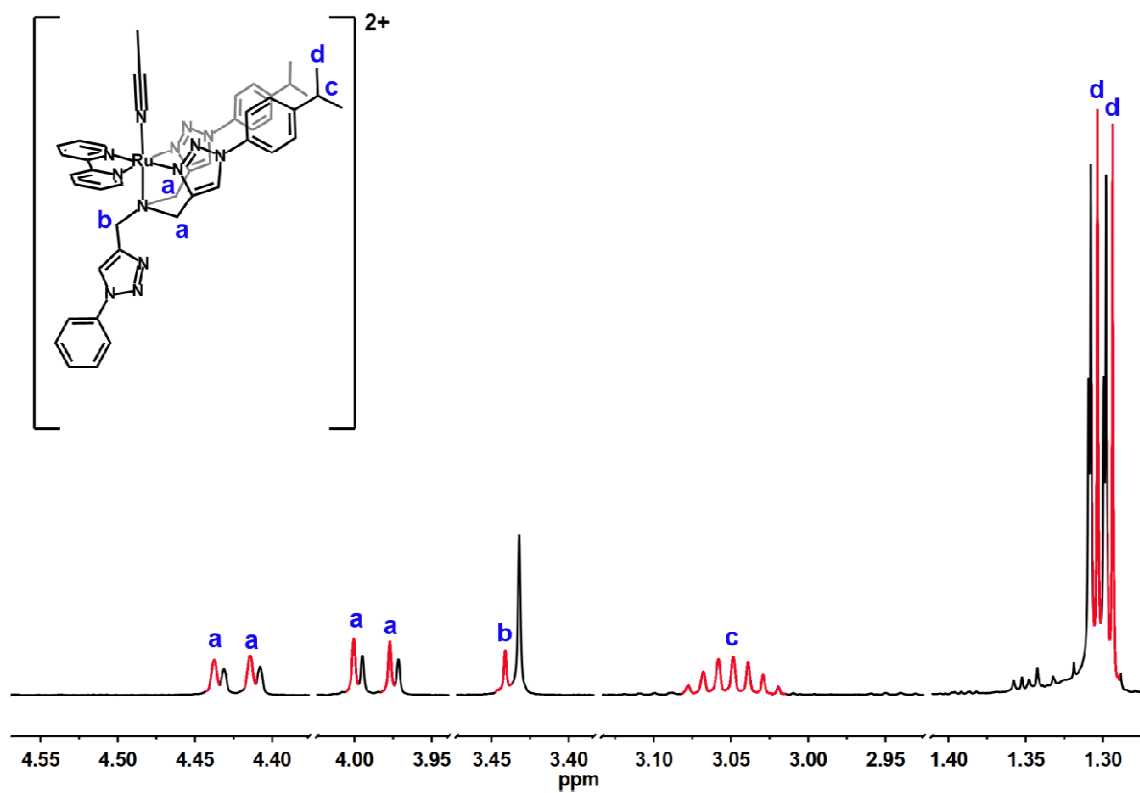

**Figure S76.**  $^1\text{H}$  NMR resonances (700 MHz,  $\text{CD}_3\text{CN}$ ) of  $[\mathbf{8b}(\text{CD}_3\text{CN})]^{2+}$  (aliphatic region).



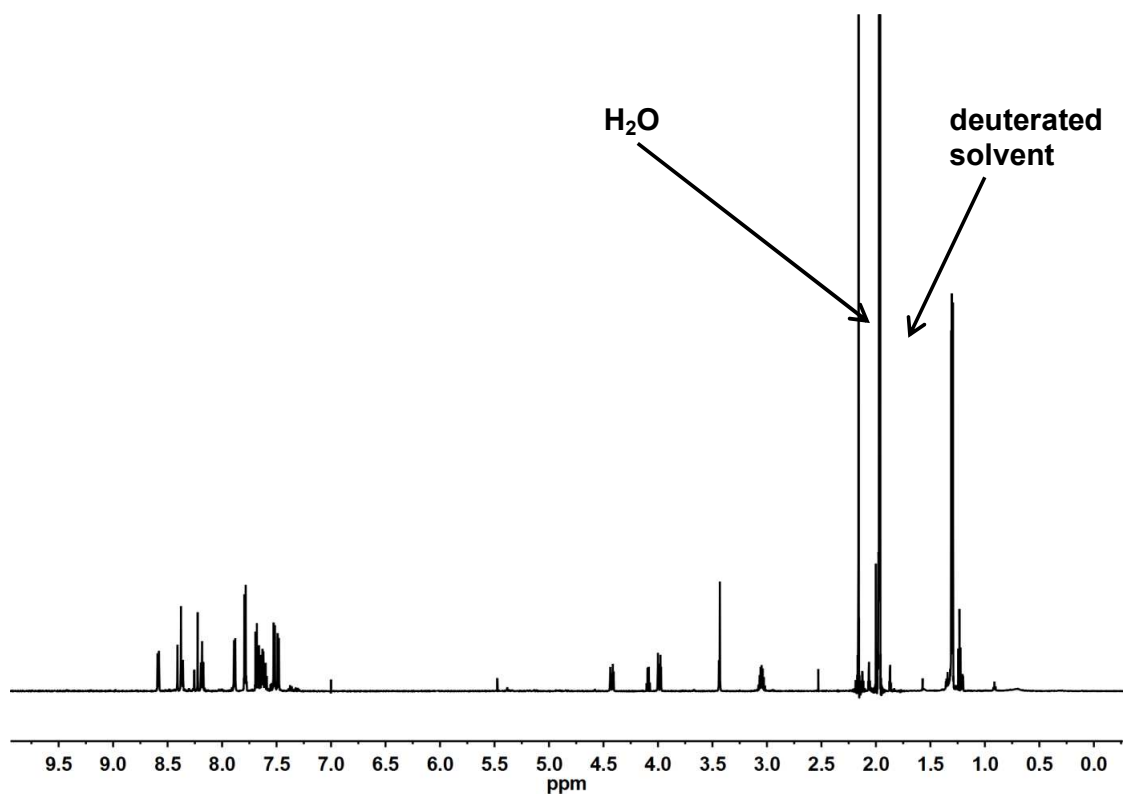

**Figure S77.** Full  $^1\text{H}$  NMR spectrum (700 MHz,  $\text{CD}_3\text{CN}$ ) of  $[\mathbf{8}(\text{CD}_3\text{CN})]^{2+}$ . Solvent impurities are indicated.

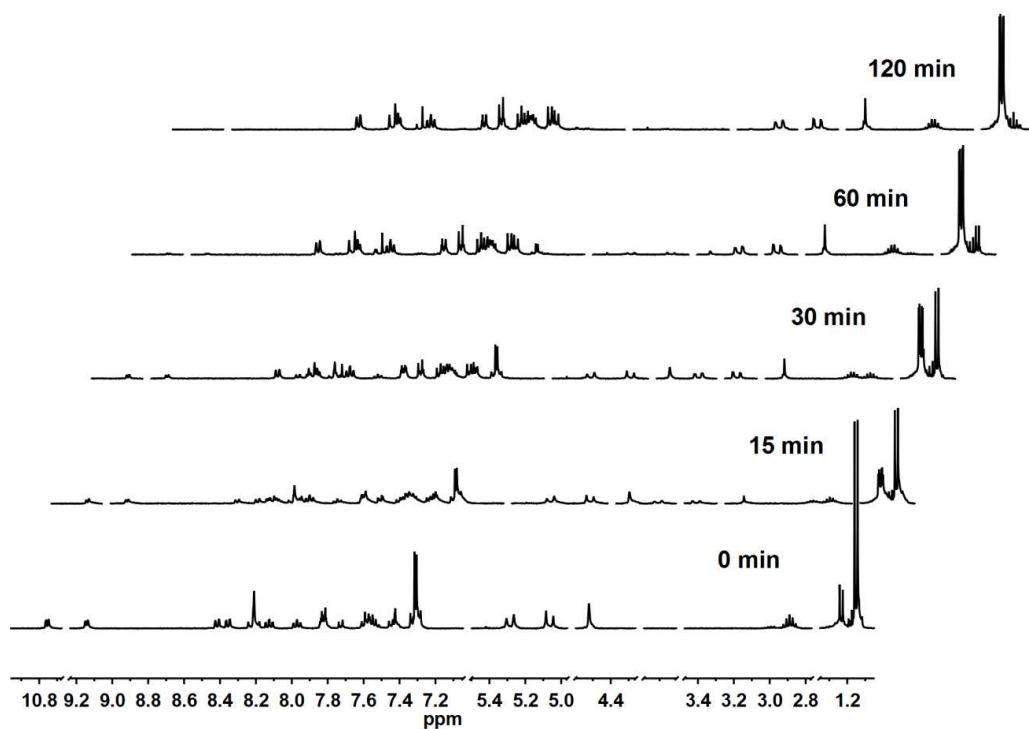

**Figure S78.** Changes in the  $^1\text{H}$  NMR spectrum (400 MHz,  $\text{CD}_3\text{CN}$ ) of  $\mathbf{8}^{2+}$  upon irradiation (369 nm).

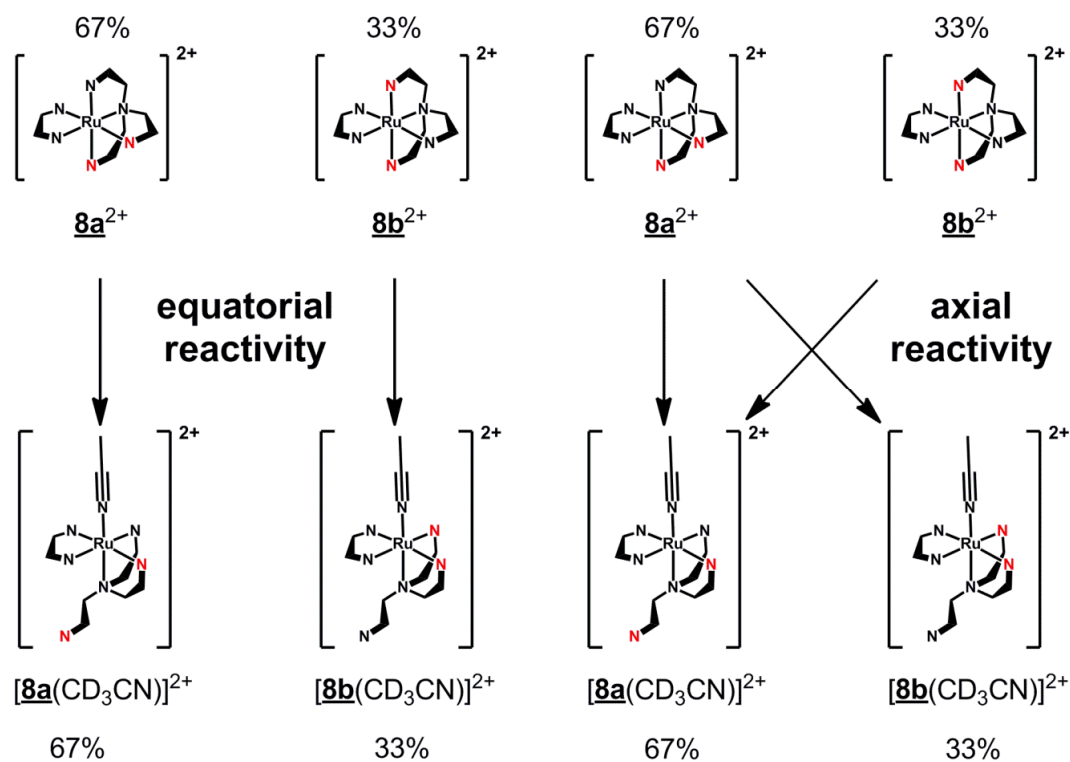

**Scheme S8.** Product ratios  $[\underline{8a}(\text{CD}_3\text{CN})]^{2+}/[\underline{8b}(\text{CD}_3\text{CN})]^{2+}$  expected when starting from a 2:1 mixture of  $\underline{8a}^{2+}/\underline{8b}^{2+}$ . Isopropyl arms are indicated by a red N.

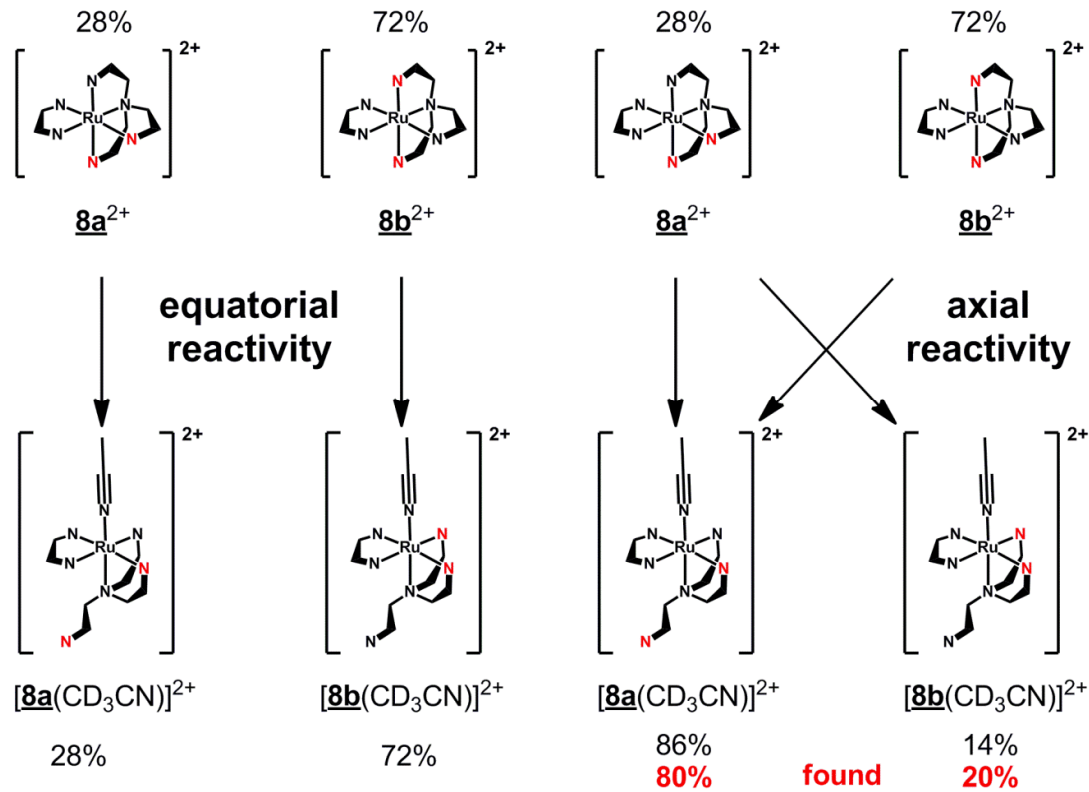

**Scheme S9.** Product ratios  $[\underline{8a}(\text{CD}_3\text{CN})]^{2+}/[\underline{8b}(\text{CD}_3\text{CN})]^{2+}$  expected when starting from a 3:7 mixture of  $\underline{8a}^{2+}/\underline{8b}^{2+}$ . Isopropyl arms are indicated by a red N.

## DFT Calculations

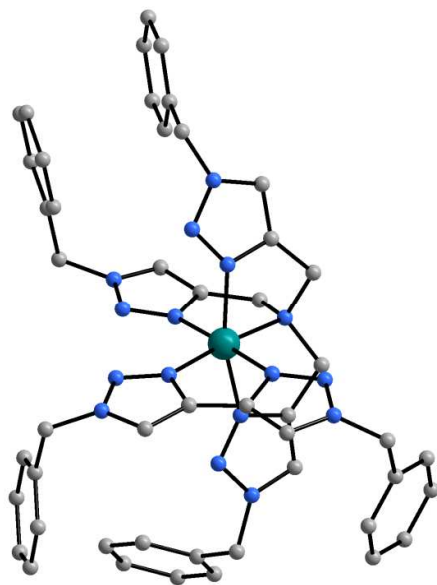

**Figure S79.** Optimized geometry of  $6^{2+}$  obtained by DFT calculations.

**Table S7: Geometry coordinates of  $6^{2+}$**

|    |                   |                  |                   |
|----|-------------------|------------------|-------------------|
| Ru | 8.88549224533536  | 3.76304462001656 | 11.89049059493820 |
| N  | 8.13282096930246  | 4.82521604840193 | 13.59471134455042 |
| N  | 10.66813421601212 | 4.35435815578616 | 12.71135912144356 |
| N  | 6.15847837199549  | 2.83500450302483 | 10.74483736303099 |
| N  | 6.89006196903332  | 3.54607585832941 | 11.57735923553111 |
| N  | 12.50271846525875 | 4.45504463304872 | 13.77649993575633 |
| N  | 4.89191333507100  | 3.23425441502582 | 10.95328844541550 |
| N  | 9.56687181105760  | 1.08344447259948 | 13.19970226146882 |
| N  | 11.87881404420374 | 3.83528473766439 | 12.75519830608614 |
| N  | 9.00359256922231  | 2.27400661466349 | 13.25759847599198 |
| C  | 13.82687704904390 | 4.01170896343884 | 14.20556256559619 |
| H  | 14.52169766810585 | 4.85947019753847 | 14.14632999102915 |
| H  | 14.14116289519438 | 3.26114873701793 | 13.46763899208164 |
| N  | 9.61943394370354  | 0.64991049115874 | 14.46904898749919 |
| C  | 7.97795357156708  | 3.89513057017620 | 14.78586178045721 |

|   |                   |                   |                   |
|---|-------------------|-------------------|-------------------|
| H | 8.31799596274354  | 4.39973919534232  | 15.69943839003215 |
| H | 6.90578648957633  | 3.69055003484719  | 14.90769201606245 |
| C | 10.49853505226247 | 5.28492757165505  | 13.71518141625532 |
| C | 3.41823728678877  | 1.26073534948756  | 10.88298016846280 |
| C | 13.79865196824407 | 3.43270147020383  | 15.60384143997960 |
| C | 4.23732026738410  | 0.13311337395895  | 10.72913120988234 |
| H | 5.14330521089436  | 0.19686753714600  | 10.12377064221531 |
| C | 8.69814678327469  | 2.61365685284165  | 14.55031238022394 |
| C | 13.91997168415043 | 0.37454904991130  | 13.97147437352588 |
| H | 14.48211091396414 | 0.83299745833964  | 13.15652307377667 |
| C | 13.85719626322656 | -0.61605637429811 | 16.17518065255004 |
| H | 14.36261877398661 | -0.91790422379109 | 17.09293523442929 |
| C | 12.47758570608354 | -0.80401574234763 | 16.04821480848271 |
| H | 11.91129346874821 | -1.25585750542169 | 16.86509093350992 |
| C | 1.92254932579044  | -0.03019965025803 | 12.29176140344929 |
| H | 1.01739592355456  | -0.09128487604615 | 12.89739567890420 |
| C | 4.80793670048097  | 4.18512499887224  | 11.92418790062874 |
| H | 3.86834480407700  | 4.62551407073033  | 12.23094317985474 |
| C | 10.31906318154152 | -0.60583708430926 | 14.75920404969607 |
| H | 10.07241212845366 | -1.28969628723677 | 13.93680950734572 |
| H | 9.89546099947910  | -1.01211549142065 | 15.68449456461716 |
| C | 9.14949031937905  | 5.90009743892054  | 13.86840605410412 |
| H | 9.01134693976688  | 6.34523449834370  | 14.86359702589649 |
| H | 8.99780762780096  | 6.68055670986136  | 13.11040317071761 |
| C | 11.81365485678173 | -0.40124543602559 | 14.88561182390428 |
| C | 13.81968200950214 | 2.32388876907697  | 18.18019440884116 |
| H | 13.82629962355702 | 1.89200448044545  | 19.18166274138745 |
| C | 3.79972416320155  | 2.56929368904261  | 10.23166664669746 |
| H | 4.15039852795239  | 2.42167551867710  | 9.20303748013575  |
| H | 2.95595395037717  | 3.26872129184863  | 10.21469672999546 |
| C | 9.10900511046879  | 1.56200553991212  | 15.34341971440522 |
| H | 9.06345574680784  | 1.38781730182207  | 16.41162034949415 |

|   |                   |                   |                   |
|---|-------------------|-------------------|-------------------|
| C | 2.74290361872162  | -1.15128072716933 | 12.13895550638402 |
| H | 2.48028652047735  | -2.09147144772733 | 12.62580574982159 |
| C | 11.68711789321520 | 5.34609033728113  | 14.40426805132718 |
| H | 12.00228477680478 | 5.91711576051513  | 15.26895614644620 |
| C | 6.79356869878144  | 5.38899832135292  | 13.21297787765164 |
| H | 6.97846948133583  | 6.31045347732020  | 12.64435395938579 |
| H | 6.19622186856557  | 5.64041294354498  | 14.09993053948178 |
| C | 12.66293961234038 | 2.26506462654904  | 17.39862007549405 |
| H | 11.76629418978162 | 1.78095314245388  | 17.78679801187518 |
| C | 12.65373110689667 | 2.81184624248338  | 16.11588036963240 |
| H | 11.74876740152379 | 2.74611733358185  | 15.51080825727740 |
| C | 6.10878180788213  | 4.40204142422312  | 12.32133544226007 |
| C | 3.89997643430163  | -1.06699341055029 | 11.35629540564222 |
| H | 4.53839775640549  | -1.94248310831410 | 11.23305186227099 |
| C | 2.26123029877473  | 1.17324449125788  | 11.66580826285354 |
| H | 1.61931373546668  | 2.04882977995692  | 11.78334864484029 |
| C | 14.57990988368377 | -0.02396550664509 | 15.13882356886965 |
| H | 15.65354941848427 | 0.13598949349167  | 15.24174562400096 |
| C | 12.54357188134406 | 0.18939745309176  | 13.84349880641534 |
| H | 12.02753203281752 | 0.51902265238101  | 12.94031154261462 |
| C | 14.95566319830160 | 3.49221879765329  | 16.38914616810100 |
| H | 15.85090657745672 | 3.97917440901473  | 15.99717277210384 |
| C | 14.96838720213618 | 2.93419767061023  | 17.66983783067473 |
| H | 15.87596351570084 | 2.98569881546875  | 18.27292373955272 |
| H | 8.22610660781365  | 5.96430792209827  | 7.30167967146986  |
| C | 8.35306647074435  | 5.85192129462285  | 8.37117236527594  |
| N | 7.99564634075571  | 6.81981608507436  | 9.25724215565381  |
| C | 7.11889630435683  | 7.97791493864036  | 9.02225834034110  |
| H | 7.51426073817968  | 8.82238224953774  | 9.59781501845655  |
| C | 5.71391373658831  | 7.61472219764215  | 9.45265305642747  |
| C | 5.21409400143530  | 8.06104368609911  | 10.68176403707704 |
| C | 3.94911993460090  | 7.65664349945529  | 11.11693770587788 |

|   |                   |                   |                   |
|---|-------------------|-------------------|-------------------|
| H | 3.56656657390220  | 8.00979504907988  | 12.07537400305866 |
| C | 3.17860882183317  | 6.79860356402929  | 10.32680587535911 |
| H | 2.19026854076738  | 6.48420178518280  | 10.66546111255045 |
| C | 3.67555162283839  | 6.34643881101789  | 9.09999712193811  |
| H | 3.07621367265653  | 5.68110054083545  | 8.47719890833430  |
| H | 5.81932188682548  | 8.72534602946170  | 11.30125316604742 |
| C | 4.93832706679786  | 6.75347280618838  | 8.66507228664848  |
| H | 5.32275431819223  | 6.39686354464766  | 7.70721789673721  |
| H | 7.18317604902654  | 8.21302303703243  | 7.95381654135750  |
| N | 8.21494707700297  | 6.44321428354688  | 10.53007448274427 |
| N | 8.72241237283351  | 5.23098393796067  | 10.46760078238905 |
| C | 8.83399444173391  | 4.81833627807978  | 9.15208449616438  |
| C | 9.27348625034779  | 3.46060331633095  | 8.99927553904707  |
| N | 9.44954369529759  | 2.78311371365881  | 10.19641188504880 |
| N | 9.80164604948288  | 1.53717826292296  | 9.97238145799750  |
| N | 9.84558081191507  | 1.40375876230864  | 8.63185534560671  |
| C | 9.99991564832862  | 0.05749979053014  | 8.06262211453545  |
| H | 10.80871732223193 | -0.43299193560380 | 8.61707158290728  |
| H | 10.31160520322756 | 0.18440172145724  | 7.01988658926854  |
| C | 8.70127191118209  | -0.70948215004312 | 8.17112463301587  |
| C | 8.34928120813445  | -1.32451851572388 | 9.38024175759752  |
| H | 9.03061588186329  | -1.26969523548883 | 10.23046592270850 |
| C | 7.12685375181981  | -1.98694605016912 | 9.50129154837767  |
| H | 6.86435755469257  | -2.46884097003730 | 10.44415369133097 |
| C | 6.24359209003056  | -2.03424337853489 | 8.41751136925856  |
| C | 6.58922673775394  | -1.42006015399922 | 7.21053580629343  |
| H | 5.90488996369849  | -1.45616381087701 | 6.36183846515854  |
| H | 5.28704088426118  | -2.54989160097185 | 8.51277843330199  |
| C | 7.81569799608673  | -0.76052540765405 | 7.08815904519322  |
| H | 8.08615693402622  | -0.28246453980960 | 6.14428379759148  |
| C | 9.52097997520390  | 2.55496830366020  | 7.98759173323147  |
| H | 9.48769374592304  | 2.63418281796229  | 6.90802947330354  |

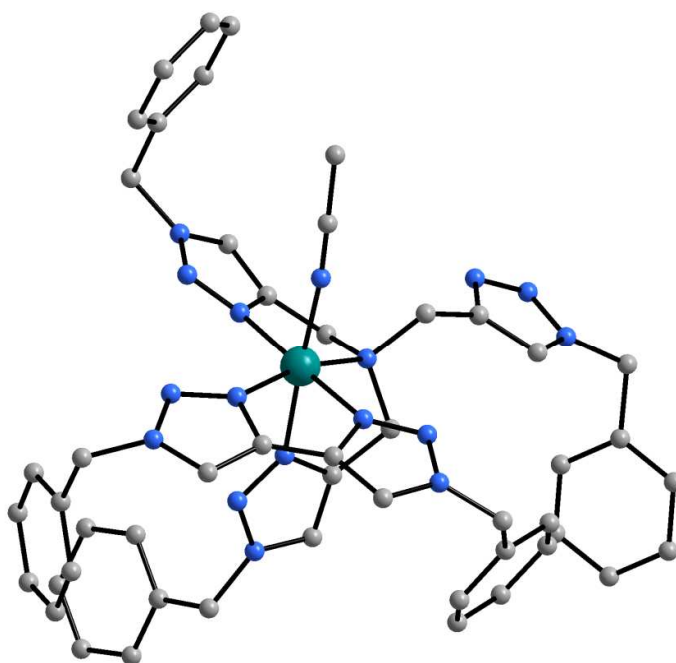

**Figure S80.** Optimized geometry of  $[6a(CH_3CN)]^{2+}$  obtained by DFT calculations.

**Table S8: Geometry coordinates of  $[6a(CH_3CN)]^{2+}$**

|    |                   |                   |                   |
|----|-------------------|-------------------|-------------------|
| Ru | 9.75680875906767  | 3.42861651883564  | 11.84270665279991 |
| N  | 9.16951908178085  | 4.60658047805656  | 13.59120977567310 |
| N  | 9.79358521065461  | 6.13543300275632  | 16.45431921434512 |
| N  | 6.91581033938252  | 3.03026160277110  | 10.76747792504622 |
| N  | 7.76126202526076  | 3.64753504186328  | 11.56602821922630 |
| N  | 9.27552317722924  | 8.20963469932123  | 16.21497102313105 |
| N  | 5.73575903550539  | 3.64451226320904  | 10.96100324553317 |
| N  | 10.08923143367423 | 0.71559743630556  | 13.20708928137366 |
| N  | 9.39451369662219  | 7.20128773710012  | 17.11331653905996 |
| N  | 9.58733219133308  | 1.93380385420801  | 13.21710583328366 |
| C  | 8.78039922419456  | 9.52293152403212  | 16.62353894034126 |
| H  | 9.52106199859363  | 10.28151850158122 | 16.34057090433388 |
| H  | 8.72705569533656  | 9.49136149844385  | 17.72027183048604 |
| N  | 10.07110492031883 | 0.31131953789765  | 14.48729447266886 |

|   |                   |                   |                   |
|---|-------------------|-------------------|-------------------|
| C | 8.66801734340316  | 3.67115973883615  | 14.67620425415075 |
| H | 8.88038775377696  | 4.09008519037269  | 15.66873648083889 |
| H | 7.57555499591844  | 3.60592619603855  | 14.57626972500556 |
| C | 9.92422255813933  | 6.44942772674995  | 15.12552159931464 |
| C | 3.81064775324807  | 2.09205328063089  | 11.11012899543623 |
| C | 7.43236537878764  | 9.83231971166197  | 16.01131233292812 |
| C | 4.47449469268519  | 1.26663256708012  | 12.02419037876864 |
| H | 5.54656624192772  | 1.38155301610950  | 12.18713013533640 |
| C | 9.26313987333177  | 2.32408826019801  | 14.49143039069778 |
| C | 14.36339624228786 | -0.92287766824567 | 13.66057960519166 |
| H | 14.93357608799520 | -1.21606812210700 | 12.77813155317417 |
| C | 14.27517664561958 | 0.04289039062327  | 15.87957889111275 |
| H | 14.77677020735920 | 0.50154244301669  | 16.73262972617318 |
| C | 12.89599395692943 | -0.17416844073894 | 15.91778826860357 |
| H | 12.32484602709273 | 0.11531079085348  | 16.80237750337580 |
| C | 1.74370935817980  | 0.90523895811201  | 11.56169250948188 |
| H | 0.67709741446213  | 0.76897269387560  | 11.37803058221230 |
| C | 5.82270618058575  | 4.64008836782074  | 11.88869588846681 |
| H | 4.96785616030207  | 5.23369763985317  | 12.18625791626594 |
| C | 10.74167139368314 | -0.94612933407652 | 14.84735310777887 |
| H | 10.41915002245743 | -1.70592501934405 | 14.12643770868731 |
| H | 10.37547198291426 | -1.22487532931637 | 15.84212183016952 |
| C | 10.31306993550232 | 5.45178379770505  | 14.08936286021489 |
| H | 10.73142832134789 | 5.96033853368416  | 13.21367462601441 |
| H | 11.06670051644503 | 4.75862814104588  | 14.48059318684392 |
| C | 12.24245714749601 | -0.76454588652051 | 14.82797381924549 |
| C | 4.92180727405907  | 10.44267170673462 | 14.91745415684703 |
| H | 3.94777449905040  | 10.67796324727304 | 14.48693113532058 |
| C | 4.55175513456772  | 3.12227622484685  | 10.28698388821426 |
| H | 4.91388249428334  | 2.67505788650568  | 9.34946973310668  |
| H | 3.90414994159233  | 3.97032445511318  | 10.03447809686729 |
| C | 9.58363264956412  | 1.27154873999838  | 15.32094760661629 |



|   |                   |                   |                   |
|---|-------------------|-------------------|-------------------|
| H | 9.50344650420721  | 1.13241134310062  | 16.39208965980276 |
| C | 2.41069816259449  | 0.08099892674187  | 12.47338109073655 |
| H | 1.86709444340409  | -0.70296648704240 | 13.00221454660187 |
| C | 9.59006309481407  | 7.78402311664386  | 14.96901261773104 |
| H | 9.55956097187338  | 8.43416051208402  | 14.10279466318436 |
| C | 8.02073742755825  | 5.47617192244552  | 13.14978658137660 |
| H | 8.44196803180165  | 6.31541054045646  | 12.57832696169503 |
| H | 7.47574362360614  | 5.88387291493195  | 14.01228810685024 |
| C | 5.18058988511880  | 9.15839182953079  | 15.40848331034599 |
| H | 4.40759057040297  | 8.39001813166097  | 15.36600338853596 |
| C | 6.42881235262195  | 8.85496210094282  | 15.95390343056198 |
| H | 6.62255079756889  | 7.85140330004399  | 16.33752990605971 |
| C | 7.14723761171298  | 4.65171802481509  | 12.26909930720984 |
| C | 3.77591934160819  | 0.26884205553530  | 12.70695013355721 |
| H | 4.30335624112374  | -0.37113335570550 | 13.41552761574361 |
| C | 2.44015760780349  | 1.91135485450414  | 10.88795309518179 |
| H | 1.91710227518365  | 2.55620167449803  | 10.17880748866575 |
| C | 15.01146670907148 | -0.33306704951621 | 14.75079172812107 |
| H | 16.08911834657594 | -0.16649002518898 | 14.72133395846104 |
| C | 12.98261565672419 | -1.13425550722568 | 13.69835796553992 |
| H | 12.47468642816234 | -1.58655665585240 | 12.84501351166567 |
| C | 7.17193726346978  | 11.11363342950731 | 15.51214539204203 |
| H | 7.95508430312958  | 11.87367502147624 | 15.54050313949453 |
| C | 5.91931254873098  | 11.41958033797446 | 14.97080570772800 |
| H | 5.72848890487571  | 12.41949865214850 | 14.57919452901515 |
| H | 9.55632362709899  | 6.06994143100493  | 7.43954684799376  |
| C | 9.70154821394226  | 5.83233026657838  | 8.48599597556006  |
| N | 9.78471084624344  | 6.78905754850128  | 9.44944931197016  |
| C | 9.42227733728274  | 8.21506765582405  | 9.36975069847730  |
| H | 10.26169754462237 | 8.80945977781471  | 9.74884307216629  |
| C | 8.17108906831927  | 8.42052080236411  | 10.19496985867492 |
| C | 8.23539619972663  | 9.07511587838016  | 11.43035358722107 |

|   |                  |                   |                   |
|---|------------------|-------------------|-------------------|
| C | 7.10624347025137 | 9.14259916315070  | 12.25158571954756 |
| H | 7.15882412703625 | 9.65214288124917  | 13.21375164600724 |
| C | 5.90777870456630 | 8.55310494367713  | 11.84149637697290 |
| H | 5.03084423965418 | 8.60116678642885  | 12.48707050510154 |
| C | 5.83491766286428 | 7.91065188433804  | 10.60122029865938 |
| H | 4.89768085830497 | 7.46051711260810  | 10.27179852430820 |
| H | 9.17793774933628 | 9.52242246635963  | 11.75208192471058 |
| C | 6.96229345727259 | 7.84446374846199  | 9.78138741310515  |
| H | 6.90592144444038 | 7.32876448034243  | 8.82039177958149  |
| H | 9.27518596490346 | 8.44300904558090  | 8.30791085693258  |
| N | 9.93314015503598 | 6.25732000597510  | 10.67565192984068 |
| N | 9.94613176234205 | 4.95677097145660  | 10.50479448718801 |
| C | 9.81826319229034 | 4.63436838524552  | 9.16843420830488  |
| C | 9.73840885770525 | 3.22052046791834  | 8.92343738471134  |
| N | 9.84879314937116 | 2.43508341864308  | 10.06118455025988 |
| N | 9.64638397488299 | 1.17031132526570  | 9.77150843702245  |
| N | 9.40131465825441 | 1.13261360191303  | 8.44819486114961  |
| C | 8.86893901053756 | -0.10792811816176 | 7.86161707048648  |
| H | 9.47909718321129 | -0.93500395333154 | 8.24195339053301  |
| H | 9.00967098623067 | -0.03117534404776 | 6.77747339708025  |
| C | 7.41276985375428 | -0.26568374231183 | 8.23800300043226  |
| C | 7.05994357456318 | -0.96969295684684 | 9.39638673844526  |
| H | 7.83840108359165 | -1.44228117182902 | 9.99747031161078  |
| C | 5.72362918046998 | -1.05328089100734 | 9.79006654747538  |
| H | 5.45737463874109 | -1.59760832755847 | 10.69639213001215 |
| C | 4.72890940281305 | -0.42929584937984 | 9.03188235180795  |
| C | 5.07503207271945 | 0.27361007341159  | 7.87399930117320  |
| H | 4.30215100656552 | 0.75774537392971  | 7.27513667747879  |
| H | 3.68681083645062 | -0.48431429563036 | 9.34846371067479  |
| C | 6.41345851339965 | 0.35438622172266  | 7.47831862913822  |
| H | 6.68077026958705 | 0.90510980003462  | 6.57393120704594  |
| C | 9.43945222145899 | 2.36708913945076  | 7.88156230871511  |

|   |                   |                  |                   |
|---|-------------------|------------------|-------------------|
| H | 9.24428250729590  | 2.53608377643741 | 6.82995437256937  |
| N | 11.70244938452652 | 3.29620638096591 | 12.23020005880907 |
| C | 12.80884685843322 | 3.10218833611992 | 12.52982250070444 |
| C | 14.17812034839605 | 2.84598864110681 | 12.91322513083096 |
| H | 14.81431659007855 | 2.78281278888422 | 12.01965165483438 |
| H | 14.23591109338275 | 1.89121134269462 | 13.45716701967385 |
| H | 14.55037504035193 | 3.65060551698155 | 13.56229204932957 |

## Literature

- (1) (a) Demko, Z. B.; Sharpless, K. B.; *Angew. Chem. Int. Ed.* **2002**, *41*, 2110; (b) Cwiklicki, A.; Rehse, K. *Arch. Pharm. Pharm. Med. Chem.* **2004**, 337, 156.
- (2) Hohloch, S.; Su, C.-Y.; Sarkar, B. *Eur. J. Inorg. Chem.*, **2011**, 3067.
- (3) Kojima, T.; Sakamoto, T.; Matsuda, Y. *Inorg. Chem.* **2004**, *43*, 2243.
- (4) Kojima, T.; Nakayama, K.; Sakaguchi, M.; Ogura, T.; Ohkubo, K.; Fukuzumi, S. *J. Am. Chem. Soc.* **2011**, *133*, 17901.
